# Supplementary material for: Antibiotic management of urinary tract infection in elderly patients in primary care and its association with bloodstream infections and all cause mortality: population based cohort study
Source: PubMed Central journal article supplement (PMC6391656; doi:10.1136/bmj.l525), 2019-02-27
Supplement: gham045885.wt1.pdf [file gham045885.wt1.pdf]

**Table S1: Read codes used to identify patients with UTI, complications of UTI and BSI in CPRD**

| <b>Read codes for identifying patients with a UTI at the cohort selection stage</b> |                                                               |
|-------------------------------------------------------------------------------------|---------------------------------------------------------------|
| 1AG..00                                                                             | Recurrent urinary tract infections                            |
| 1J4..00                                                                             | Suspected UTI                                                 |
| K15..00                                                                             | Cystitis                                                      |
| K150.00                                                                             | Acute cystitis                                                |
| K15z.00                                                                             | Cystitis NOS                                                  |
| K190.00                                                                             | Urinary tract infection, site not specified                   |
| K190.11                                                                             | Recurrent urinary tract infection                             |
| K190100                                                                             | Pyuria, site not specified                                    |
| K190200                                                                             | Post-operative urinary tract infection                        |
| K190300                                                                             | Recurrent urinary tract infection                             |
| K190311                                                                             | Recurrent UTI                                                 |
| K190400                                                                             | Chronic urinary tract infection                               |
| K190500                                                                             | Urinary tract infection                                       |
| K190z00                                                                             | Urinary tract infection, site not specified NOS               |
| SP07700                                                                             | Infect+inflam react due pros dev, implt+graft in urinary syst |
| SP07Q00                                                                             | Catheter-associated urinary tract infection                   |
| SP07Q11                                                                             | CAUTI - catheter-associated urinary tract infection           |
| K15y.00                                                                             | Other specified cystitis                                      |
| K152z00                                                                             | Other chronic cystitis NOS                                    |
| K152.00                                                                             | Other chronic cystitis                                        |
| K152y00                                                                             | Chronic cystitis unspecified                                  |
| K155.00                                                                             | Recurrent cystitis                                            |
| K15yz00                                                                             | Other cystitis NOS                                            |
| 1AZ6000                                                                             | Mild lower urinary tract symptoms                             |
| 7N51.00                                                                             | [SO]Lower urinary tract                                       |
| 1AZ6100                                                                             | Moderate lower urinary tract symptoms                         |
| 1AZ6.00                                                                             | Lower urinary tract symptoms                                  |
| Kyu5100                                                                             | [X]Other cystitis                                             |
| 14D4.00                                                                             | H/O: recurrent cystitis                                       |
| <b>Read codes for identifying upper UTIs or complications of UTIs in CPRD data</b>  |                                                               |
| K100.00                                                                             | Chronic pyelonephritis                                        |
| K100000                                                                             | Chronic pyelonephritis without medullary necrosis             |
| K100100                                                                             | Chronic pyelonephritis with medullary necrosis                |
| K100400                                                                             | Nonobstructive reflux-associated chronic pyelonephritis       |
| K100500                                                                             | Chronic obstructive pyelonephritis                            |
| K100600                                                                             | Calculous pyelonephritis                                      |
| K100z00                                                                             | Chronic pyelonephritis NOS                                    |
| K101.00                                                                             | Acute pyelonephritis                                          |
| K101000                                                                             | Acute pyelonephritis without medullary necrosis               |
| K101z00                                                                             | Acute pyelonephritis NOS                                      |
| K104.00                                                                             | Xanthogranulomatous pyelonephritis                            |

|                                                                             |                                                         |
|-----------------------------------------------------------------------------|---------------------------------------------------------|
| K10y.00                                                                     | Pyelonephritis and pyonephrosis unspecified             |
| K10y000                                                                     | Pyelonephritis unspecified                              |
| K10y300                                                                     | Pyelonephritis in diseases EC                           |
| K10yz00                                                                     | Unspecified pyelonephritis NOS                          |
| K100200                                                                     | Chronic pyelitis                                        |
| K10y400                                                                     | Pyelitis in diseases EC                                 |
| K101200                                                                     | Acute pyelitis                                          |
| K10y100                                                                     | Pyelitis unspecified                                    |
| K102000                                                                     | Renal abscess                                           |
| K102.00                                                                     | Renal and perinephric abscess                           |
| K102100                                                                     | Perinephric abscess                                     |
| K102z00                                                                     | Renal and perinephric abscess NOS                       |
| K10..00                                                                     | Infections of kidney                                    |
| K10z.00                                                                     | Infection of kidney NOS                                 |
| K10..11                                                                     | Renal infections                                        |
| K10..00                                                                     | Infections of kidney                                    |
| K10z.00                                                                     | Infection of kidney NOS                                 |
| K21..11                                                                     | Prostatitis and other inflammatory diseases of prostate |
| K210.00                                                                     | Acute prostatitis                                       |
| K211.00                                                                     | Chronic prostatitis                                     |
| K214.00                                                                     | Prostatitis in diseases EC                              |
| K214z00                                                                     | Prostatitis in diseases EC NOS                          |
| K21z.00                                                                     | Prostatitis NOS                                         |
| K213.00                                                                     | Prostatoctitis                                          |
| K212.00                                                                     | Abscess of prostate                                     |
| K10y200                                                                     | Pyonephrosis unspecified                                |
| K105.00                                                                     | Chronic infective interstitial nephritis                |
| A160200                                                                     | Tuberculous pyelonephritis                              |
| A160100                                                                     | Tuberculous pyelitis                                    |
| <b>Read codes for identifying bloodstream infection/sepsis in CPRD data</b> |                                                         |
| A38z.11                                                                     | Sepsis                                                  |
| A38..00                                                                     | Septicaemia                                             |
| A3C..00                                                                     | Sepsis                                                  |
| K190600                                                                     | Urosepsis                                               |
| A38z.00                                                                     | Septicaemia NOS                                         |
| A381.00                                                                     | Staphylococcal septicaemia                              |
| R106.00                                                                     | [D]Unspecified bacteraemia                              |
| A380.00                                                                     | Streptococcal septicaemia                               |
| A382.00                                                                     | Pneumococcal septicaemia                                |
| A384200                                                                     | Escherichia coli septicaemia                            |
| A384211                                                                     | E.coli septicaemia                                      |
| A384.00                                                                     | Septicaemia due to other gram negative organisms        |
| A3Cz.00                                                                     | Sepsis NOS                                              |
| A3Cy.00                                                                     | Other specified sepsis                                  |

|         |                                                      |
|---------|------------------------------------------------------|
| A381000 | Septicaemia due to Staphylococcus aureus             |
| A38y.00 | Other specified septicaemias                         |
| A380100 | Septicaemia due to streptococcus, group B            |
| A384300 | Pseudomonas septicaemia                              |
| A384000 | Gram negative septicaemia NOS                        |
| A380300 | Septicaemia due to streptococcus pneumoniae          |
| A384100 | Haemophilus influenzae septicaemia                   |
| A380400 | Septicaemia due to enterococcus                      |
| A380000 | Septicaemia due to streptococcus, group A            |
| Ayu3J00 | [X]Septicaemia, unspecified                          |
| AB2y300 | Candidal septicaemia                                 |
| A270100 | Listeria septicaemia                                 |
| A383.00 | Septicaemia due to anaerobes                         |
| A3C3.00 | Sepsis due to Gram negative bacteria                 |
| A381100 | Septicaemia due to coagulase-negative staphylococcus |
| A3C0100 | Sepsis due to Streptococcus group B                  |
| A380500 | Vancomycin resistant enterococcal septicaemia        |
| A3C1.00 | Sepsis due to Staphylococcus                         |
| A384400 | Serratia septicaemia                                 |
| A3C2.11 | Sepsis due to anaerobes                              |
| AB2y500 | Candidal sepsis                                      |
| A3C1000 | Sepsis due to Staphylococcus aureus                  |
| A3C0300 | Sepsis due to Streptococcus pneumoniae               |
| A3C0000 | Sepsis due to Streptococcus group A                  |
| A3C0.00 | Sepsis due to Streptococcus                          |
| A270611 | Listerial sepsis                                     |
| A384z00 | Other gram negative septicaemia NOS                  |
| A3C0z00 | Streptococcal sepsis, unspecified                    |
| A3C0y00 | Other streptococcal sepsis                           |
| Ayu3F00 | [X]Streptococcal septicaemia, unspecified            |
| A396.00 | Sepsis due to Actinomyces                            |
| A3C2.00 | Sepsis due to anaerobic bacteria                     |
| Ayu3E00 | [X]Other streptococcal septicaemia                   |
| A271100 | Erysipelothrix septicaemia                           |
| Ayu3G00 | [X]Septicaemia due to other gram-negative organisms  |
| A3C3.11 | Sepsis due to Gram negative organisms                |
| AB2y511 | Sepsis due to Candida                                |
| A3C3y00 | Sepsis due to other Gram negative organisms          |
| A270600 | Sepsis due to Listeria monocytogenes                 |
| Ayu3H00 | [X]Other specified septicaemia                       |

**Table S2: ICD-10 codes used to identify patients with a complication following an episode of UTI and with a BSI in HES**

| <b>ICD-10 codes for identifying upper UTI/advanced UTI in HES data<br/>(pyelonephritis, pyelitis, perinephric abscess, renal abscesses, and prostatitis)</b> |                                                                                               |
|--------------------------------------------------------------------------------------------------------------------------------------------------------------|-----------------------------------------------------------------------------------------------|
| N10                                                                                                                                                          | Acute tubulo-interstitial nephritis                                                           |
| N11                                                                                                                                                          | Chronic tubulo-interstitial nephritis                                                         |
| N11.0                                                                                                                                                        | Nonobstructive reflux-associated chronic pyelonephritis                                       |
| N11.1                                                                                                                                                        | Chronic obstructive pyelonephritis                                                            |
| N11.8                                                                                                                                                        | Other chronic tubulo-interstitial nephritis                                                   |
| N11.9                                                                                                                                                        | Chronic tubulo-interstitial nephritis, unspecified                                            |
| N12                                                                                                                                                          | Tubulo-interstitial nephritis, not specified as acute or chronic                              |
| N13                                                                                                                                                          | Obstructive and reflux uropathy                                                               |
| N13.2                                                                                                                                                        | Hydronephrosis with renal and ureteral calculous obstruction                                  |
| N20                                                                                                                                                          | Calculus of kidney and ureter                                                                 |
| N20.9                                                                                                                                                        | Urinary calculus, unspecified                                                                 |
| N28                                                                                                                                                          | Other disorders of kidney and ureter, not elsewhere classified                                |
| N28.8                                                                                                                                                        | Other specified disorders of kidney and ureter                                                |
| N16.0*                                                                                                                                                       | Renal tubulo-interstitial disorders in infectious and parasitic diseases classified elsewhere |
| N15                                                                                                                                                          | Other renal tubulo-interstitial diseases                                                      |
| N15.1                                                                                                                                                        | Renal and perinephric abscess                                                                 |
| N41                                                                                                                                                          | Inflammatory diseases of prostate                                                             |
| N41.0                                                                                                                                                        | Acute prostatitis                                                                             |
| N41.1                                                                                                                                                        | Chronic prostatitis                                                                           |
| N41.3                                                                                                                                                        | Prostatocystitis                                                                              |
| N41.8                                                                                                                                                        | Other inflammatory diseases of prostate                                                       |
| N41.9                                                                                                                                                        | Inflammatory disease of prostate, unspecified                                                 |
| N28.84                                                                                                                                                       | Pyelitis cystica                                                                              |
| N28.85                                                                                                                                                       | Pyeloureteritis cystica                                                                       |
| N28.86                                                                                                                                                       | Ureteritis cystica                                                                            |
| N34                                                                                                                                                          | Urethral Abscess                                                                              |
| N139                                                                                                                                                         | Obstructive and reflux uropathy, unspecified                                                  |
| <b>ICD-10 codes for identifying bloodstream infection/sepsis in HES data</b>                                                                                 |                                                                                               |
| A41.5                                                                                                                                                        | Sepsis due to other Gram-negative organisms                                                   |
| A41.51                                                                                                                                                       | Sepsis due to Escherichia coli [E. coli]                                                      |
| A41.52                                                                                                                                                       | Sepsis due to Pseudomonas                                                                     |
| A41.53                                                                                                                                                       | Sepsis due to Serratia                                                                        |
| A41.59                                                                                                                                                       | Other Gram-negative sepsis                                                                    |
| A41.8                                                                                                                                                        | Other specified sepsis                                                                        |
| A41.81                                                                                                                                                       | Sepsis due to Enterococcus                                                                    |
| A41.9                                                                                                                                                        | Sepsis, unspecified                                                                           |
| R57.2                                                                                                                                                        | Septic shock                                                                                  |
| R65.1                                                                                                                                                        | Systemic Inflammatory Response Syndrome of infectious origin with organ failure               |
| R65.0                                                                                                                                                        | Systemic Inflammatory Response Syndrome of infectious origin without organ failure            |
| A40                                                                                                                                                          | Streptococcal sepsis                                                                          |
| A41                                                                                                                                                          | Other septicaemia                                                                             |
| R78.81                                                                                                                                                       | Bacteremia                                                                                    |
| R65.20                                                                                                                                                       | Severe sepsis without septic shock                                                            |
| R65.21                                                                                                                                                       | Severe sepsis with septic shock                                                               |

**Table S3: Read codes used to construct the Charlson Comorbidity Index (CCI) in CPRD**

| Classification | Read_code | Description                                           |
|----------------|-----------|-------------------------------------------------------|
| cancer         | 100..00   | Cancer confirmed                                      |
| cancer         | 4C53.00   | Bone marrow: myeloma cells                            |
| cancer         | 4C54.00   | Bone marrow: tumour cells                             |
| cancer         | 4D56.00   | Pleural fluid: malignant cells                        |
| cancer         | 4E33.00   | Sputum: malignant cells                               |
| cancer         | 4F32.00   | Ascitic fluid: malignant cells                        |
| cancer         | 4K24.00   | Cerv.smear: severe dyskaryosis                        |
| cancer         | 4K24.11   | CIN III - severe dyskaryosis                          |
| cancer         | 4K2L.00   | Cervical smear - high grade dyskaryosis (severe)      |
| cancer         | 4K2M.00   | invasive squamous carcinoma                           |
| cancer         | 4M...00   | Tumour staging                                        |
| cancer         | 4M0..00   | Gleason grading of prostate cancer                    |
| cancer         | 4M00.00   | Gleason prostate grade 2-4 (low)                      |
| cancer         | 4M01.00   | Gleason prostate grade 5-7 (medium)                   |
| cancer         | 4M02.00   | Gleason prostate grade 8-10 (high)                    |
| cancer         | 4M1..00   | Dukes staging system                                  |
| cancer         | 4M10.00   | Dukes stage A                                         |
| cancer         | 4M11.00   | Dukes stage B                                         |
| cancer         | 4M12.00   | Dukes stage C1                                        |
| cancer         | 4M13.00   | Dukes stage C2                                        |
| cancer         | 4M14.00   | Dukes stage D                                         |
| cancer         | 4M2..00   | Lymphoma staging system                               |
| cancer         | 4M20.00   | Lymphoma stage I                                      |
| cancer         | 4M21.00   | Lymphoma stage II                                     |
| cancer         | 4M22.00   | Lymphoma stage III                                    |
| cancer         | 4M23.00   | Lymphoma stage IV                                     |
| cancer         | 4M3..00   | Breslow depth staging for melanoma                    |
| cancer         | 4M4..00   | FIGO staging of gynaecological malignancy             |
| cancer         | 4M5..00   | TNM tumour staging                                    |
| cancer         | 4M6..00   | Recurrence of tumour                                  |
| cancer         | 4M7..00   | Clark staging levels                                  |
| cancer         | 4M70.00   | Clark melanoma level 1                                |
| cancer         | 4M71.00   | Clark melanoma level 2                                |
| cancer         | 4M72.00   | Clark melanoma level 3                                |
| cancer         | 4M73.00   | Clark melanoma level 4                                |
| cancer         | 4M74.00   | Clark melanoma level 5                                |
| cancer         | 68W2400   | Bowel scope (flexible sigmoidoscopy) screen: cancer   |
| cancer         | 9Ow1.00   | Bowel cancer detected by national screening programme |
| cancer         | A788W00   | HIV dis resulting in unspecified malignant neoplasm   |

|        |         |                                                       |
|--------|---------|-------------------------------------------------------|
| cancer | A789600 | HIV dis resulting in Burkitt's lymphoma               |
| cancer | A789700 | HIV dis resulting oth types of non-Hodgkin's lymphoma |
| cancer | A789800 | HIV dis resulting in multiple malignant neoplasms     |
| cancer | A789X00 | HIV reslt/oth mal neopl/lymph,hematopoetc+reltd tissu |
| cancer | AyuC600 | [X]HIV dis resulting in other non-Hodgkin's lymphoma  |
| cancer | B...11  | Cancers                                               |
| cancer | B0...00 | Malignant neoplasm of lip, oral cavity and pharynx    |
| cancer | B0...11 | Carcinoma of lip, oral cavity and pharynx             |
| cancer | B00..00 | Malignant neoplasm of lip                             |
| cancer | B00..11 | Carcinoma of lip                                      |
| cancer | B000.00 | Malignant neoplasm of upper lip, vermilion border     |
| cancer | B000000 | Malignant neoplasm of upper lip, external             |
| cancer | B000100 | Malignant neoplasm of upper lip, lipstick area        |
| cancer | B000z00 | Malignant neoplasm of upper lip, vermilion border NOS |
| cancer | B001.00 | Malignant neoplasm of lower lip, vermilion border     |
| cancer | B001000 | Malignant neoplasm of lower lip, external             |
| cancer | B001100 | Malignant neoplasm of lower lip, lipstick area        |
| cancer | B001z00 | Malignant neoplasm of lower lip, vermilion border NOS |
| cancer | B002.00 | Malignant neoplasm of upper lip, inner aspect         |
| cancer | B002100 | Malignant neoplasm of upper lip, frenulum             |
| cancer | B002200 | Malignant neoplasm of upper lip, mucosa               |
| cancer | B002300 | Malignant neoplasm of upper lip, oral aspect          |
| cancer | B002z00 | Malignant neoplasm of upper lip, inner aspect NOS     |
| cancer | B003.00 | Malignant neoplasm of lower lip, inner aspect         |
| cancer | B003000 | Malignant neoplasm of lower lip, buccal aspect        |
| cancer | B003100 | Malignant neoplasm of lower lip, frenulum             |
| cancer | B003200 | Malignant neoplasm of lower lip, mucosa               |
| cancer | B003300 | Malignant neoplasm of lower lip, oral aspect          |
| cancer | B003z00 | Malignant neoplasm of lower lip, inner aspect NOS     |
| cancer | B004.00 | Malignant neoplasm of lip unspecified, inner aspect   |
| cancer | B004000 | Malignant neoplasm of lip unspecified, buccal aspect  |
| cancer | B004200 | Malignant neoplasm of lip unspecified, mucosa         |
| cancer | B004300 | Malignant neoplasm of lip, oral aspect                |
| cancer | B005.00 | Malignant neoplasm of commissure of lip               |
| cancer | B006.00 | Malignant neoplasm of overlapping lesion of lip       |
| cancer | B007.00 | Malignant neoplasm of lip, unspecified                |
| cancer | B00z000 | Malignant neoplasm of lip, unspecified, external      |
| cancer | B00z100 | Malignant neoplasm of lip, unspecified, lipstick area |
| cancer | B00zz00 | Malignant neoplasm of lip, vermilion border NOS       |
| cancer | B01..00 | Malignant neoplasm of tongue                          |
| cancer | B010.00 | Malignant neoplasm of base of tongue                  |
| cancer | B010.11 | Malignant neoplasm of posterior third of tongue       |
| cancer | B010000 | Malignant neoplasm of base of tongue dorsal surface   |
| cancer | B010z00 | Malignant neoplasm of fixed part of tongue NOS        |

|        |         |                                                          |
|--------|---------|----------------------------------------------------------|
| cancer | B011.00 | Malignant neoplasm of dorsal surface of tongue           |
| cancer | B011100 | Malignant neoplasm of midline of tongue                  |
| cancer | B011z00 | Malignant neoplasm of dorsum of tongue NOS               |
| cancer | B012.00 | Malignant neoplasm of tongue, tip and lateral border     |
| cancer | B013.00 | Malignant neoplasm of ventral surface of tongue          |
| cancer | B013000 | Malignant neoplasm of anterior 2/3 of tongue ventral     |
| cancer | B013100 | Malignant neoplasm of frenulum linguae                   |
| cancer | B013z00 | Malignant neoplasm of ventral tongue surface NOS         |
| cancer | B014.00 | Malignant neoplasm of anterior 2/3 of tongue unspecified |
| cancer | B015.00 | Malignant neoplasm of tongue, junctional zone            |
| cancer | B016.00 | Malignant neoplasm of lingual tonsil                     |
| cancer | B017.00 | Malignant overlapping lesion of tongue                   |
| cancer | B01y.00 | Malignant neoplasm of other sites of tongue              |
| cancer | B01z.00 | Malignant neoplasm of tongue NOS                         |
| cancer | B02..00 | Malignant neoplasm of major salivary glands              |
| cancer | B020.00 | Malignant neoplasm of parotid gland                      |
| cancer | B021.00 | Malignant neoplasm of submandibular gland                |
| cancer | B022.00 | Malignant neoplasm of sublingual gland                   |
| cancer | B02y.00 | Malignant neoplasm of other major salivary glands        |
| cancer | B02z.00 | Malignant neoplasm of major salivary gland NOS           |
| cancer | B03..00 | Malignant neoplasm of gum                                |
| cancer | B030.00 | Malignant neoplasm of upper gum                          |
| cancer | B031.00 | Malignant neoplasm of lower gum                          |
| cancer | B03y.00 | Malignant neoplasm of other sites of gum                 |
| cancer | B03z.00 | Malignant neoplasm of gum NOS                            |
| cancer | B04..00 | Malignant neoplasm of floor of mouth                     |
| cancer | B040.00 | Malignant neoplasm of anterior portion of floor of mouth |
| cancer | B041.00 | Malignant neoplasm of lateral portion of floor of mouth  |
| cancer | B042.00 | Malignant neoplasm, overlapping lesion of floor of mouth |
| cancer | B04y.00 | Malignant neoplasm of other sites of floor of mouth      |
| cancer | B04z.00 | Malignant neoplasm of floor of mouth NOS                 |
| cancer | B05..00 | Malignant neoplasm of other/unspecified parts of mouth   |
| cancer | B050.00 | Malignant neoplasm of cheek mucosa                       |
| cancer | B050.11 | Malignant neoplasm of buccal mucosa                      |
| cancer | B051.00 | Malignant neoplasm of vestibule of mouth                 |
| cancer | B051000 | Malignant neoplasm of upper buccal sulcus                |
| cancer | B051100 | Malignant neoplasm of lower buccal sulcus                |
| cancer | B052.00 | Malignant neoplasm of hard palate                        |
| cancer | B053.00 | Malignant neoplasm of soft palate                        |
| cancer | B054.00 | Malignant neoplasm of uvula                              |
| cancer | B055.00 | Malignant neoplasm of palate unspecified                 |
| cancer | B055000 | Malignant neoplasm of junction of hard and soft palate   |
| cancer | B055100 | Malignant neoplasm of roof of mouth                      |
| cancer | B055z00 | Malignant neoplasm of palate NOS                         |

|        |         |                                                          |
|--------|---------|----------------------------------------------------------|
| cancer | B056.00 | Malignant neoplasm of retromolar area                    |
| cancer | B05y.00 | Malignant neoplasm of other specified mouth parts        |
| cancer | B05z.00 | Malignant neoplasm of mouth NOS                          |
| cancer | B05z000 | Kaposi's sarcoma of palate                               |
| cancer | B06..00 | Malignant neoplasm of oropharynx                         |
| cancer | B060.00 | Malignant neoplasm of tonsil                             |
| cancer | B060000 | Malignant neoplasm of faucial tonsil                     |
| cancer | B060100 | Malignant neoplasm of palatine tonsil                    |
| cancer | B060200 | Malignant neoplasm of overlapping lesion of tonsil       |
| cancer | B060z00 | Malignant neoplasm tonsil NOS                            |
| cancer | B061.00 | Malignant neoplasm of tonsillar fossa                    |
| cancer | B062.00 | Malignant neoplasm of tonsillar pillar                   |
| cancer | B062000 | Malignant neoplasm of faucial pillar                     |
| cancer | B062100 | Malignant neoplasm of glossopalatine fold                |
| cancer | B062200 | Malignant neoplasm of palatoglossal arch                 |
| cancer | B062300 | Malignant neoplasm of palatopharyngeal arch              |
| cancer | B062z00 | Malignant neoplasm of tonsillar fossa NOS                |
| cancer | B063.00 | Malignant neoplasm of vallecula                          |
| cancer | B064.00 | Malignant neoplasm of anterior epiglottis                |
| cancer | B064000 | Malignant neoplasm of epiglottis, free border            |
| cancer | B064100 | Malignant neoplasm of glossoepiglottic fold              |
| cancer | B064z00 | Malignant neoplasm of anterior epiglottis NOS            |
| cancer | B065.00 | Malignant neoplasm of junctional region of epiglottis    |
| cancer | B066.00 | Malignant neoplasm of lateral wall of oropharynx         |
| cancer | B067.00 | Malignant neoplasm of posterior wall of oropharynx       |
| cancer | B06y.00 | Malignant neoplasm of oropharynx, other specified sites  |
| cancer | B06yz00 | Malignant neoplasm of other specified site of oropharynx |
| cancer | B06z.00 | Malignant neoplasm of oropharynx NOS                     |
| cancer | B07..00 | Malignant neoplasm of nasopharynx                        |
| cancer | B070.00 | Malignant neoplasm of roof of nasopharynx                |
| cancer | B071.00 | Malignant neoplasm of posterior wall of nasopharynx      |
| cancer | B071000 | Malignant neoplasm of adenoid                            |
| cancer | B071100 | Malignant neoplasm of pharyngeal tonsil                  |
| cancer | B071z00 | Malignant neoplasm of posterior wall of nasopharynx      |
| cancer | B072.00 | Malignant neoplasm of lateral wall of nasopharynx        |
| cancer | B072000 | Malignant neoplasm of pharyngeal recess                  |
| cancer | B072z00 | Malignant neoplasm of lateral wall of nasopharynx NOS    |
| cancer | B073.00 | Malignant neoplasm of anterior wall of nasopharynx       |
| cancer | B073100 | Malignant neoplasm of nasopharyngeal soft palate         |
| cancer | B073200 | Malignant neoplasm poste margin nasal septum/ choanae    |
| cancer | B073z00 | Malignant neoplasm of anterior wall of nasopharynx NOS   |
| cancer | B074.00 | Malignant neoplasm, overlapping lesion of nasopharynx    |
| cancer | B07y.00 | Malignant neoplasm of other specified site nasopharynx   |
| cancer | B07z.00 | Malignant neoplasm of nasopharynx NOS                    |



|        |         |                                                              |
|--------|---------|--------------------------------------------------------------|
| cancer | B08..00 | Malignant neoplasm of hypopharynx                            |
| cancer | B080.00 | Malignant neoplasm of postcricoid region                     |
| cancer | B081.00 | Malignant neoplasm of pyriform sinus                         |
| cancer | B082.00 | Malignant neoplasm aryepiglottic fold, hypopharyngeal        |
| cancer | B083.00 | Malignant neoplasm of posterior pharynx                      |
| cancer | B08y.00 | Malignant neoplasm of other specified hypopharyngeal         |
| cancer | B08z.00 | Malignant neoplasm of hypopharynx NOS                        |
| cancer | B0z..00 | Malig neop other/ill-defined sites lip, oral cavity, pharynx |
| cancer | B0z0.00 | Malignant neoplasm of pharynx unspecified                    |
| cancer | B0z1.00 | Malignant neoplasm of Waldeyer's ring                        |
| cancer | B0z2.00 | Malignant neoplasm of laryngopharynx                         |
| cancer | B0zy.00 | Malignant neoplasm of other sites lip, oral cavity, pharynx  |
| cancer | B0zz.00 | Malignant neoplasm of lip, oral cavity and pharynx NOS       |
| cancer | B1...00 | Malignant neoplasm of digestive organs and peritoneum        |
| cancer | B1...11 | Carcinoma of digestive organs and peritoneum                 |
| cancer | B10..00 | Malignant neoplasm of oesophagus                             |
| cancer | B100.00 | Malignant neoplasm of cervical oesophagus                    |
| cancer | B101.00 | Malignant neoplasm of thoracic oesophagus                    |
| cancer | B102.00 | Malignant neoplasm of abdominal oesophagus                   |
| cancer | B103.00 | Malignant neoplasm of upper third of oesophagus              |
| cancer | B104.00 | Malignant neoplasm of middle third of oesophagus             |
| cancer | B105.00 | Malignant neoplasm of lower third of oesophagus              |
| cancer | B106.00 | Malignant neoplasm, overlapping lesion of oesophagus         |
| cancer | B107.00 | Siewert type I adenocarcinoma                                |
| cancer | B10y.00 | Malignant neoplasm of other specified part oesophagus        |
| cancer | B10z.00 | Malignant neoplasm of oesophagus NOS                         |
| cancer | B10z.11 | Oesophageal cancer                                           |
| cancer | B11..00 | Malignant neoplasm of stomach                                |
| cancer | B110.00 | Malignant neoplasm of cardia of stomach                      |
| cancer | B110000 | Malignant neoplasm of cardiac orifice of stomach             |
| cancer | B110100 | Malignant neoplasm of cardiooesophageal junct stomach        |
| cancer | B110111 | Malignant neoplasm of gastro-oesophageal junction            |
| cancer | B110z00 | Malignant neoplasm of cardia of stomach NOS                  |
| cancer | B111.00 | Malignant neoplasm of pylorus of stomach                     |
| cancer | B111000 | Malignant neoplasm of prepylorus of stomach                  |
| cancer | B111100 | Malignant neoplasm of pyloric canal of stomach               |
| cancer | B111z00 | Malignant neoplasm of pylorus of stomach NOS                 |
| cancer | B112.00 | Malignant neoplasm of pyloric antrum of stomach              |
| cancer | B113.00 | Malignant neoplasm of fundus of stomach                      |
| cancer | B114.00 | Malignant neoplasm of body of stomach                        |
| cancer | B115.00 | Malignant neoplasm of lesser curve stomach unspecified       |
| cancer | B116.00 | Malignant neoplasm of greater curve stomach unspecified      |
| cancer | B117.00 | Malignant neoplasm, overlapping lesion of stomach            |
| cancer | B118.00 | Siewert type II adenocarcinoma                               |

|        |         |                                                            |
|--------|---------|------------------------------------------------------------|
| cancer | B119.00 | Siewert type III adenocarcinoma                            |
| cancer | B11y.00 | Malignant neoplasm of other specified site of stomach      |
| cancer | B11y000 | Malignant neoplasm of anterior wall of stomach NEC         |
| cancer | B11y100 | Malignant neoplasm of posterior wall of stomach NEC        |
| cancer | B11yz00 | Malignant neoplasm of other specified site of stomach      |
| cancer | B11z.00 | Malignant neoplasm of stomach NOS                          |
| cancer | B12..00 | Malignant neoplasm of small intestine and duodenum         |
| cancer | B120.00 | Malignant neoplasm of duodenum                             |
| cancer | B121.00 | Malignant neoplasm of jejunum                              |
| cancer | B122.00 | Malignant neoplasm of ileum                                |
| cancer | B123.00 | Malignant neoplasm of Meckel's diverticulum                |
| cancer | B124.00 | Malignant neoplasm, overlapping lesion of small intestine  |
| cancer | B12y.00 | Malignant neoplasm of other specified site small intestine |
| cancer | B12z.00 | Malignant neoplasm of small intestine NOS                  |
| cancer | B13..00 | Malignant neoplasm of colon                                |
| cancer | B130.00 | Malignant neoplasm of hepatic flexure of colon             |
| cancer | B131.00 | Malignant neoplasm of transverse colon                     |
| cancer | B132.00 | Malignant neoplasm of descending colon                     |
| cancer | B133.00 | Malignant neoplasm of sigmoid colon                        |
| cancer | B134.00 | Malignant neoplasm of caecum                               |
| cancer | B134.11 | Carcinoma of caecum                                        |
| cancer | B135.00 | Malignant neoplasm of appendix                             |
| cancer | B136.00 | Malignant neoplasm of ascending colon                      |
| cancer | B137.00 | Malignant neoplasm of splenic flexure of colon             |
| cancer | B138.00 | Malignant neoplasm, overlapping lesion of colon            |
| cancer | B139.00 | Hereditary nonpolyposis colon cancer                       |
| cancer | B13y.00 | Malignant neoplasm of other specified sites of colon       |
| cancer | B13z.00 | Malignant neoplasm of colon NOS                            |
| cancer | B13z.11 | Colonic cancer                                             |
| cancer | B14..00 | Malignant neoplasm rectum/rectosigmoid junction/ anus      |
| cancer | B140.00 | Malignant neoplasm of rectosigmoid junction                |
| cancer | B141.00 | Malignant neoplasm of rectum                               |
| cancer | B141.11 | Carcinoma of rectum                                        |
| cancer | B141.12 | Rectal carcinoma                                           |
| cancer | B142.00 | Malignant neoplasm of anal canal                           |
| cancer | B142.11 | Anal carcinoma                                             |
| cancer | B142000 | Malignant neoplasm of cloacogenic zone                     |
| cancer | B143.00 | Malignant neoplasm of anus unspecified                     |
| cancer | B14y.00 | Malig neop other site rectum/rectosigmoid junction/ anus   |
| cancer | B15..00 | Malignant neoplasm of liver and intrahepatic bile ducts    |
| cancer | B150.00 | Primary malignant neoplasm of liver                        |
| cancer | B150000 | Primary carcinoma of liver                                 |
| cancer | B150100 | Hepatoblastoma of liver                                    |
| cancer | B150200 | Primary angiosarcoma of liver                              |

|        |         |                                                          |
|--------|---------|----------------------------------------------------------|
| cancer | B150300 | Hepatocellular carcinoma                                 |
| cancer | B150z00 | Primary malignant neoplasm of liver NOS                  |
| cancer | B151.00 | Malignant neoplasm of intrahepatic bile ducts            |
| cancer | B151000 | Malignant neoplasm of interlobular bile ducts            |
| cancer | B151200 | Malignant neoplasm of intrahepatic biliary passages      |
| cancer | B151400 | Malignant neoplasm of intrahepatic gall duct             |
| cancer | B151z00 | Malignant neoplasm of intrahepatic bile ducts NOS        |
| cancer | B152.00 | Malignant neoplasm of liver unspecified                  |
| cancer | B15z.00 | Malignant neoplasm of liver and intrahepatic bile ducts  |
| cancer | B16..00 | Malignant neoplasm gallbladder/extrahepatic bile ducts   |
| cancer | B160.00 | Malignant neoplasm of gallbladder                        |
| cancer | B160.11 | Carcinoma gallbladder                                    |
| cancer | B161.00 | Malignant neoplasm of extrahepatic bile ducts            |
| cancer | B161000 | Malignant neoplasm of cystic duct                        |
| cancer | B161100 | Malignant neoplasm of hepatic duct                       |
| cancer | B161200 | Malignant neoplasm of common bile duct                   |
| cancer | B161211 | Carcinoma common bile duct                               |
| cancer | B161300 | Malignant neoplasm of sphincter of Oddi                  |
| cancer | B161z00 | Malignant neoplasm of extrahepatic bile ducts NOS        |
| cancer | B162.00 | Malignant neoplasm of ampulla of Vater                   |
| cancer | B163.00 | Malignant neoplasm, overlapping lesion of biliary tract  |
| cancer | B16y.00 | Malignant neopl other gallbladder/extrahepatic bile duct |
| cancer | B16z.00 | Malignant neoplasm gallbladder/extrahepatic bile ducts   |
| cancer | B17..00 | Malignant neoplasm of pancreas                           |
| cancer | B170.00 | Malignant neoplasm of head of pancreas                   |
| cancer | B171.00 | Malignant neoplasm of body of pancreas                   |
| cancer | B172.00 | Malignant neoplasm of tail of pancreas                   |
| cancer | B173.00 | Malignant neoplasm of pancreatic duct                    |
| cancer | B174.00 | Malignant neoplasm of Islets of Langerhans               |
| cancer | B175.00 | Malignant neoplasm, overlapping lesion of pancreas       |
| cancer | B17y.00 | Malignant neoplasm of other specified sites of pancreas  |
| cancer | B17y000 | Malignant neoplasm of ectopic pancreatic tissue          |
| cancer | B17yz00 | Malignant neoplasm of specified site of pancreas NOS     |
| cancer | B17z.00 | Malignant neoplasm of pancreas NOS                       |
| cancer | B18..00 | Malignant neoplasm of retroperitoneum and peritoneum     |
| cancer | B180.00 | Malignant neoplasm of retroperitoneum                    |
| cancer | B180100 | Malignant neoplasm of perinephric tissue                 |
| cancer | B180200 | Malignant neoplasm of retrocaecal tissue                 |
| cancer | B180z00 | Malignant neoplasm of retroperitoneum NOS                |
| cancer | B181.00 | Mesothelioma of peritoneum                               |
| cancer | B182.00 | Overlapping malign lesion retroperitoneum/ peritoneum    |
| cancer | B18y.00 | Malignant neoplasm of specified parts of peritoneum      |
| cancer | B18y100 | Malignant neoplasm of mesocaecum                         |
| cancer | B18y200 | Malignant neoplasm of mesorectum                         |

|        |         |                                                            |
|--------|---------|------------------------------------------------------------|
| cancer | B18y300 | Malignant neoplasm of omentum                              |
| cancer | B18y400 | Malignant neoplasm of parietal peritoneum                  |
| cancer | B18y500 | Malignant neoplasm of pelvic peritoneum                    |
| cancer | B18y600 | Malignant neoplasm of the pouch of Douglas                 |
| cancer | B18y700 | Malignant neoplasm of mesentery                            |
| cancer | B18yz00 | Malignant neoplasm of specified parts of peritoneum NOS    |
| cancer | B18z.00 | Malignant neoplasm of retroperitoneum and peritoneum       |
| cancer | B1z..00 | Malig neop oth/illdefined sites digestive tract/peritoneum |
| cancer | B1z0.00 | Malignant neoplasm of intestinal tract, part unspecified   |
| cancer | B1z0.11 | Cancer of bowel                                            |
| cancer | B1z1.00 | Malignant neoplasm of spleen NEC                           |
| cancer | B1z1000 | Angiosarcoma of spleen                                     |
| cancer | B1z1100 | Fibrosarcoma of spleen                                     |
| cancer | B1z1z00 | Malignant neoplasm of spleen NOS                           |
| cancer | B1z2.00 | Malignant neoplasm, overlapping lesion of digestive syst   |
| cancer | B1zy.00 | Malignant neoplasm other spec digest tract/ peritoneum     |
| cancer | B1zz.00 | Malignant neoplasm of digestive tract and peritoneum       |
| cancer | B2...00 | Malig neop of respiratory tract and intrathoracic organs   |
| cancer | B2...11 | Carcinoma of respiratory tract and intrathoracic organs    |
| cancer | B20..00 | Malig neop nasal cavities, middle ear/accessory sinuses    |
| cancer | B200.00 | Malignant neoplasm of nasal cavities                       |
| cancer | B200000 | Malignant neoplasm of cartilage of nose                    |
| cancer | B200100 | Malignant neoplasm of nasal conchae                        |
| cancer | B200200 | Malignant neoplasm of septum of nose                       |
| cancer | B200300 | Malignant neoplasm of vestibule of nose                    |
| cancer | B200z00 | Malignant neoplasm of nasal cavities NOS                   |
| cancer | B201.00 | Malig neop auditory tube, middle ear and mastoid air cells |
| cancer | B201000 | Malignant neoplasm of auditory (Eustachian) tube           |
| cancer | B201100 | Malignant neoplasm of tympanic cavity                      |
| cancer | B201200 | Malignant neoplasm of tympanic antrum                      |
| cancer | B201300 | Malignant neoplasm of mastoid air cells                    |
| cancer | B201z00 | Malig neop auditory tube, middle ear, mastoid air cells    |
| cancer | B202.00 | Malignant neoplasm of maxillary sinus                      |
| cancer | B203.00 | Malignant neoplasm of ethmoid sinus                        |
| cancer | B204.00 | Malignant neoplasm of frontal sinus                        |
| cancer | B205.00 | Malignant neoplasm of sphenoidal sinus                     |
| cancer | B206.00 | Malignant neopl, overlapping lesion of accessory sinuses   |
| cancer | B20y.00 | Malig neop other site nasal cavity, middle ear and sinuses |
| cancer | B20z.00 | Malignant neoplasm of accessory sinus NOS                  |
| cancer | B21..00 | Malignant neoplasm of larynx                               |
| cancer | B210.00 | Malignant neoplasm of glottis                              |
| cancer | B211.00 | Malignant neoplasm of supraglottis                         |
| cancer | B212.00 | Malignant neoplasm of subglottis                           |
| cancer | B213.00 | Malignant neoplasm of laryngeal cartilage                  |

|        |         |                                                        |
|--------|---------|--------------------------------------------------------|
| cancer | B213000 | Malignant neoplasm of arytenoid cartilage              |
| cancer | B213100 | Malignant neoplasm of cricoid cartilage                |
| cancer | B213200 | Malignant neoplasm of cuneiform cartilage              |
| cancer | B213300 | Malignant neoplasm of thyroid cartilage                |
| cancer | B213z00 | Malignant neoplasm of laryngeal cartilage NOS          |
| cancer | B214.00 | Malignant neoplasm, overlapping lesion of larynx       |
| cancer | B215.00 | Malignant neoplasm of epiglottis NOS                   |
| cancer | B21y.00 | Malignant neoplasm of larynx, other specified site     |
| cancer | B21z.00 | Malignant neoplasm of larynx NOS                       |
| cancer | B22..00 | Malignant neoplasm of trachea, bronchus and lung       |
| cancer | B220.00 | Malignant neoplasm of trachea                          |
| cancer | B220100 | Malignant neoplasm of mucosa of trachea                |
| cancer | B220z00 | Malignant neoplasm of trachea NOS                      |
| cancer | B221.00 | Malignant neoplasm of main bronchus                    |
| cancer | B221000 | Malignant neoplasm of carina of bronchus               |
| cancer | B221100 | Malignant neoplasm of hilus of lung                    |
| cancer | B221z00 | Malignant neoplasm of main bronchus NOS                |
| cancer | B222.00 | Malignant neoplasm of upper lobe, bronchus or lung     |
| cancer | B222.11 | Pancoast's synde                                       |
| cancer | B222000 | Malignant neoplasm of upper lobe bronchus              |
| cancer | B222100 | Malignant neoplasm of upper lobe of lung               |
| cancer | B222z00 | Malignant neoplasm of upper lobe, bronchus or lung NOS |
| cancer | B223.00 | Malignant neoplasm of middle lobe, bronchus or lung    |
| cancer | B223000 | Malignant neoplasm of middle lobe bronchus             |
| cancer | B223100 | Malignant neoplasm of middle lobe of lung              |
| cancer | B223z00 | Malignant neoplasm of middle lobe, bronchus or lung    |
| cancer | B224.00 | Malignant neoplasm of lower lobe, bronchus or lung     |
| cancer | B224000 | Malignant neoplasm of lower lobe bronchus              |
| cancer | B224100 | Malignant neoplasm of lower lobe of lung               |
| cancer | B224z00 | Malignant neoplasm of lower lobe, bronchus or lung NOS |
| cancer | B225.00 | Malignant neopl of overlapping lesion of bronchus/lung |
| cancer | B226.00 | Mesothelioma                                           |
| cancer | B22y.00 | Malignant neoplasm of other sites of bronchus or lung  |
| cancer | B22z.00 | Malignant neoplasm of bronchus or lung NOS             |
| cancer | B22z.11 | Lung cancer                                            |
| cancer | B23..00 | Malignant neoplasm of pleura                           |
| cancer | B230.00 | Malignant neoplasm of parietal pleura                  |
| cancer | B231.00 | Malignant neoplasm of visceral pleura                  |
| cancer | B232.00 | Mesothelioma of pleura                                 |
| cancer | B23y.00 | Malignant neoplasm of other specified pleura           |
| cancer | B23z.00 | Malignant neoplasm of pleura NOS                       |
| cancer | B24..00 | Malignant neoplasm of thymus, heart and mediastinum    |
| cancer | B240.00 | Malignant neoplasm of thymus                           |
| cancer | B241.00 | Malignant neoplasm of heart                            |

|        |         |                                                           |
|--------|---------|-----------------------------------------------------------|
| cancer | B241000 | Malignant neoplasm of endocardium                         |
| cancer | B241200 | Malignant neoplasm of myocardium                          |
| cancer | B241300 | Malignant neoplasm of pericardium                         |
| cancer | B241400 | Mesothelioma of pericardium                               |
| cancer | B241z00 | Malignant neoplasm of heart NOS                           |
| cancer | B242.00 | Malignant neoplasm of anterior mediastinum                |
| cancer | B243.00 | Malignant neoplasm of posterior mediastinum               |
| cancer | B24X.00 | Malignant neoplasm of mediastinum, part unspecified       |
| cancer | B24y.00 | Malig neop of other site of heart, thymus/mediastinum     |
| cancer | B24z.00 | Malignant neoplasm of heart, thymus and mediastinum       |
| cancer | B25..00 | Malig neo, overlapp lesion of heart, mediastinum/ pleura  |
| cancer | B26..00 | Malignant neoplasm, overlap lesion of resp/intrathor orgs |
| cancer | B2z..00 | Malig neop /illdefined sites resp/intrathoracic organs    |
| cancer | B2z0.00 | Malig neop of upper respiratory tract, part unspecified   |
| cancer | B2zy.00 | Malignant neoplasm of other site of respiratory tract     |
| cancer | B2zz.00 | Malignant neoplasm of respiratory tract NOS               |
| cancer | B3...00 | Malig neop of bone, connective tissue, skin and breast    |
| cancer | B3...11 | Carcinoma of bone, connective tissue, skin and breast     |
| cancer | B3...12 | Sarcoma of bone and connective tissue                     |
| cancer | B30..00 | Malignant neoplasm of bone and articular cartilage        |
| cancer | B300.00 | Malignant neoplasm of bones of skull and face             |
| cancer | B300000 | Malignant neoplasm of ethmoid bone                        |
| cancer | B300100 | Malignant neoplasm of frontal bone                        |
| cancer | B300200 | Malignant neoplasm of malar bone                          |
| cancer | B300300 | Malignant neoplasm of nasal bone                          |
| cancer | B300400 | Malignant neoplasm of occipital bone                      |
| cancer | B300500 | Malignant neoplasm of orbital bone                        |
| cancer | B300600 | Malignant neoplasm of parietal bone                       |
| cancer | B300700 | Malignant neoplasm of sphenoid bone                       |
| cancer | B300800 | Malignant neoplasm of temporal bone                       |
| cancer | B300900 | Malignant neoplasm of zygomatic bone                      |
| cancer | B300A00 | Malignant neoplasm of maxilla                             |
| cancer | B300B00 | Malignant neoplasm of turbinate                           |
| cancer | B300C00 | Malignant neoplasm of vomer                               |
| cancer | B300z00 | Malignant neoplasm of bones of skull and face NOS         |
| cancer | B301.00 | Malignant neoplasm of mandible                            |
| cancer | B302.00 | Malignant neoplasm of vertebral column                    |
| cancer | B302000 | Malignant neoplasm of cervical vertebra                   |
| cancer | B302100 | Malignant neoplasm of thoracic vertebra                   |
| cancer | B302200 | Malignant neoplasm of lumbar vertebra                     |
| cancer | B302z00 | Malignant neoplasm of vertebral column NOS                |
| cancer | B303.00 | Malignant neoplasm of ribs, sternum and clavicle          |
| cancer | B303000 | Malignant neoplasm of rib                                 |
| cancer | B303100 | Malignant neoplasm of sternum                             |

|        |         |                                                        |
|--------|---------|--------------------------------------------------------|
| cancer | B303200 | Malignant neoplasm of clavicle                         |
| cancer | B303300 | Malignant neoplasm of costal cartilage                 |
| cancer | B303400 | Malignant neoplasm of costo-vertebral joint            |
| cancer | B303500 | Malignant neoplasm of xiphoid process                  |
| cancer | B303z00 | Malignant neoplasm of rib, sternum and clavicle NOS    |
| cancer | B304.00 | Malignant neoplasm of scapula and long bones upper arm |
| cancer | B304000 | Malignant neoplasm of scapula                          |
| cancer | B304100 | Malignant neoplasm of acromion                         |
| cancer | B304200 | Malignant neoplasm of humerus                          |
| cancer | B304300 | Malignant neoplasm of radius                           |
| cancer | B304400 | Malignant neoplasm of ulna                             |
| cancer | B304z00 | Malig neop of scapula and long bones of upper arm NOS  |
| cancer | B305.00 | Malignant neoplasm of hand bones                       |
| cancer | B305.11 | Malignant neoplasm of carpal bones                     |
| cancer | B305.12 | Malignant neoplasm of metacarpal bones                 |
| cancer | B305000 | Malignant neoplasm of carpal bone - scaphoid           |
| cancer | B305100 | Malignant neoplasm of carpal bone - lunate             |
| cancer | B305A00 | Malignant neoplasm of third metacarpal bone            |
| cancer | B305C00 | Malignant neoplasm of fifth metacarpal bone            |
| cancer | B305D00 | Malignant neoplasm of phalanges of hand                |
| cancer | B305z00 | Malignant neoplasm of hand bones NOS                   |
| cancer | B306.00 | Malignant neoplasm of pelvic bones, sacrum and coccyx  |
| cancer | B306000 | Malignant neoplasm of ilium                            |
| cancer | B306100 | Malignant neoplasm of ischium                          |
| cancer | B306200 | Malignant neoplasm of pubis                            |
| cancer | B306300 | Malignant neoplasm of sacral vertebra                  |
| cancer | B306400 | Malignant neoplasm of coccygeal vertebra               |
| cancer | B306500 | Malignant sacral teratoma                              |
| cancer | B306z00 | Malignant neoplasm of pelvis, sacrum or coccyx NOS     |
| cancer | B307.00 | Malignant neoplasm of long bones of leg                |
| cancer | B307000 | Malignant neoplasm of femur                            |
| cancer | B307100 | Malignant neoplasm of fibula                           |
| cancer | B307200 | Malignant neoplasm of tibia                            |
| cancer | B307z00 | Malignant neoplasm of long bones of leg NOS            |
| cancer | B308.00 | Malignant neoplasm of short bones of leg               |
| cancer | B308100 | Malignant neoplasm of talus                            |
| cancer | B308200 | Malignant neoplasm of calcaneum                        |
| cancer | B308300 | Malignant neoplasm of medial cuneiform                 |
| cancer | B308800 | Malignant neoplasm of first metatarsal bone            |
| cancer | B308B00 | Malignant neoplasm of fourth metatarsal bone           |
| cancer | B308D00 | Malignant neoplasm of phalanges of foot                |
| cancer | B308z00 | Malignant neoplasm of short bones of leg NOS           |
| cancer | B30W.00 | Malignant neopl/overlap lesion/bone+articulr cartilage |
| cancer | B30X.00 | Malignant neopl/bones+articular cartilage/limb,unspfd  |

|        |         |                                                            |
|--------|---------|------------------------------------------------------------|
| cancer | B30z.00 | Malignant neoplasm of bone and articular cartilage NOS     |
| cancer | B30z000 | Osteosarcoma                                               |
| cancer | B31..00 | Malignant neoplasm of connective and other soft tissue     |
| cancer | B310.00 | Malig neop of connective and soft tissue head, face/ neck  |
| cancer | B310000 | Malignant neoplasm of soft tissue of head                  |
| cancer | B310100 | Malignant neoplasm of soft tissue of face                  |
| cancer | B310200 | Malignant neoplasm of soft tissue of neck                  |
| cancer | B310300 | Malignant neoplasm of cartilage of ear                     |
| cancer | B310400 | Malignant neoplasm of tarsus of eyelid                     |
| cancer | B310500 | Malignant neoplasm soft tissues of cervical spine          |
| cancer | B310z00 | Malig neop connective and soft tissue head, face, neck     |
| cancer | B311.00 | Malig neop connective soft tissue upper limb/shoulder      |
| cancer | B311000 | Malignant neoplasm of connective soft tissue of shoulder   |
| cancer | B311100 | Malignant neoplasm of connective soft tissue, upper arm    |
| cancer | B311200 | Malignant neoplasm of connective soft tissue of fore-arm   |
| cancer | B311300 | Malignant neoplasm of connective and soft tissue of hand   |
| cancer | B311400 | Malignant neoplasm of connective soft tissue of finger     |
| cancer | B311500 | Malignant neoplasm of connective soft tissue of thumb      |
| cancer | B311z00 | Malig neop connective soft tissue upper limb/shoulder      |
| cancer | B312.00 | Malig neop of connective and soft tissue of hip and leg    |
| cancer | B312000 | Malignant neoplasm of connective and soft tissue of hip    |
| cancer | B312100 | Malig neop of connective and soft tissue thigh upper leg   |
| cancer | B312200 | Malig neop connective and soft tissue of popliteal space   |
| cancer | B312300 | Malig neop of connective and soft tissue of lower leg      |
| cancer | B312400 | Malignant neoplasm of connective and soft tissue of foot   |
| cancer | B312500 | Malignant neoplasm of connective and soft tissue of toe    |
| cancer | B312z00 | Malig neop connective and soft tissue hip and leg NOS      |
| cancer | B313.00 | Malignant neoplasm of connective and soft tissue of thorax |
| cancer | B313000 | Malignant neoplasm of connective and soft tissue of axilla |
| cancer | B313100 | Malignant neoplasm of diaphragm                            |
| cancer | B313200 | Malignant neoplasm of great vessels                        |
| cancer | B313300 | Malig neoplasm of connective soft tissues of thor spine    |
| cancer | B313z00 | Malig neop of connective and soft tissue of thorax NOS     |
| cancer | B314.00 | Malignant neoplasm of connective soft tissue of abdomen    |
| cancer | B314000 | Malig neop of connective soft tissue of abdominal wall     |
| cancer | B314100 | Malig neoplasm of connective soft tissues of lumb spine    |
| cancer | B314z00 | Malig neop of connective and soft tissue of abdomen NOS    |
| cancer | B315.00 | Malignant neoplasm of connective soft tissue of pelvis     |
| cancer | B315000 | Malignant neoplasm of connective soft tissue of buttock    |
| cancer | B315100 | Malig neop of connective soft tissue of inguinal region    |
| cancer | B315200 | Malignant neoplasm of connective soft tissue of perineum   |
| cancer | B315z00 | Malig neop of connective and soft tissue of pelvis NOS     |
| cancer | B316.00 | Malig neop of connective and soft tissue trunk unspified   |
| cancer | B31y.00 | Malig neop connective and soft tissue other specified site |



|        |         |                                                        |
|--------|---------|--------------------------------------------------------|
| cancer | B31z.00 | Malignant neoplasm of connective and soft tissue, site |
| cancer | B31z000 | Kaposi's sarcoma of soft tissue                        |
| cancer | B32..00 | Malignant melanoma of skin                             |
| cancer | B320.00 | Malignant melanoma of lip                              |
| cancer | B321.00 | Malignant melanoma of eyelid including canthus         |
| cancer | B322.00 | Malignant melanoma of ear and external auricular canal |
| cancer | B322000 | Malignant melanoma of auricle (ear)                    |
| cancer | B322100 | Malignant melanoma of external auditory meatus         |
| cancer | B322z00 | Malignant melanoma of ear and external auricular canal |
| cancer | B323.00 | Malignant melanoma of other unspecified parts of face  |
| cancer | B323000 | Malignant melanoma of external surface of cheek        |
| cancer | B323100 | Malignant melanoma of chin                             |
| cancer | B323200 | Malignant melanoma of eyebrow                          |
| cancer | B323300 | Malignant melanoma of forehead                         |
| cancer | B323400 | Malignant melanoma of external surface of nose         |
| cancer | B323500 | Malignant melanoma of temple                           |
| cancer | B323z00 | Malignant melanoma of face NOS                         |
| cancer | B324.00 | Malignant melanoma of scalp and neck                   |
| cancer | B324000 | Malignant melanoma of scalp                            |
| cancer | B324100 | Malignant melanoma of neck                             |
| cancer | B324z00 | Malignant melanoma of scalp and neck NOS               |
| cancer | B325.00 | Malignant melanoma of trunk (excluding scrotum)        |
| cancer | B325000 | Malignant melanoma of axilla                           |
| cancer | B325100 | Malignant melanoma of breast                           |
| cancer | B325200 | Malignant melanoma of buttock                          |
| cancer | B325300 | Malignant melanoma of groin                            |
| cancer | B325400 | Malignant melanoma of perianal skin                    |
| cancer | B325500 | Malignant melanoma of perineum                         |
| cancer | B325600 | Malignant melanoma of umbilicus                        |
| cancer | B325700 | Malignant melanoma of back                             |
| cancer | B325800 | Malignant melanoma of chest wall                       |
| cancer | B325z00 | Malignant melanoma of trunk, excluding scrotum, NOS    |
| cancer | B326.00 | Malignant melanoma of upper limb and shoulder          |
| cancer | B326000 | Malignant melanoma of shoulder                         |
| cancer | B326100 | Malignant melanoma of upper arm                        |
| cancer | B326200 | Malignant melanoma of fore-arm                         |
| cancer | B326300 | Malignant melanoma of hand                             |
| cancer | B326400 | Malignant melanoma of finger                           |
| cancer | B326500 | Malignant melanoma of thumb                            |
| cancer | B326z00 | Malignant melanoma of upper limb or shoulder NOS       |
| cancer | B327.00 | Malignant melanoma of lower limb and hip               |
| cancer | B327000 | Malignant melanoma of hip                              |
| cancer | B327100 | Malignant melanoma of thigh                            |
| cancer | B327200 | Malignant melanoma of knee                             |

|        |         |                                                           |
|--------|---------|-----------------------------------------------------------|
| cancer | B327300 | Malignant melanoma of popliteal fossa area                |
| cancer | B327400 | Malignant melanoma of lower leg                           |
| cancer | B327500 | Malignant melanoma of ankle                               |
| cancer | B327600 | Malignant melanoma of heel                                |
| cancer | B327700 | Malignant melanoma of foot                                |
| cancer | B327800 | Malignant melanoma of toe                                 |
| cancer | B327900 | Malignant melanoma of great toe                           |
| cancer | B327z00 | Malignant melanoma of lower limb or hip NOS               |
| cancer | B32y.00 | Malignant melanoma of other specified skin site           |
| cancer | B32y000 | Overlapping malignant melanoma of skin                    |
| cancer | B32z.00 | Malignant melanoma of skin NOS                            |
| cancer | B339.00 | Dermatofibrosarcoma protuberans                           |
| cancer | B34..00 | Malignant neoplasm of female breast                       |
| cancer | B34..11 | Ca female breast                                          |
| cancer | B340.00 | Malignant neoplasm of nipple and areola of female breast  |
| cancer | B340000 | Malignant neoplasm of nipple of female breast             |
| cancer | B340100 | Malignant neoplasm of areola of female breast             |
| cancer | B340z00 | Malignant neoplasm of nipple or areola of female breast   |
| cancer | B341.00 | Malignant neoplasm of central part of female breast       |
| cancer | B342.00 | Malignant neoplasm upperinner quadrant female breast      |
| cancer | B343.00 | Malignant neoplasm lower-inner quadrant female breast     |
| cancer | B344.00 | Malignant neopl of upperouter quadrant female breast      |
| cancer | B345.00 | Malignant neopl of lower-outer quadrant female breast     |
| cancer | B346.00 | Malignant neoplasm of axillary tail of female breast      |
| cancer | B347.00 | Malignant neoplasm, overlapping lesion of breast          |
| cancer | B34y.00 | Malignant neoplasm of other site of female breast         |
| cancer | B34y000 | Malignant neoplasm of ectopic site of female breast       |
| cancer | B34yz00 | Malignant neoplasm of other site of female breast NOS     |
| cancer | B34z.00 | Malignant neoplasm of female breast NOS                   |
| cancer | B35..00 | Malignant neoplasm of male breast                         |
| cancer | B350.00 | Malignant neoplasm of nipple and areola of male breast    |
| cancer | B350000 | Malignant neoplasm of nipple of male breast               |
| cancer | B350100 | Malignant neoplasm of areola of male breast               |
| cancer | B35z.00 | Malignant neoplasm of other site of male breast           |
| cancer | B35z000 | Malignant neoplasm of ectopic site of male breast         |
| cancer | B35zz00 | Malignant neoplasm of male breast NOS                     |
| cancer | B36..00 | Local recurrence of malignant tumour of breast            |
| cancer | B3y..00 | Malig neop of bone, connective tissue, skin and breast OS |
| cancer | B3z..00 | Malig neop of bone, connective tissue, skin and breast    |
| cancer | B4...00 | Malignant neoplasm of genitourinary organ                 |
| cancer | B4...11 | Carcinoma of genitourinary organ                          |
| cancer | B40..00 | Malignant neoplasm of uterus, part unspecified            |
| cancer | B41..00 | Malignant neoplasm of cervix uteri                        |
| cancer | B41..11 | Cervical carcinoma (uterus)                               |

|        |         |                                                           |
|--------|---------|-----------------------------------------------------------|
| cancer | B410.00 | Malignant neoplasm of endocervix                          |
| cancer | B410000 | Malignant neoplasm of endocervical canal                  |
| cancer | B410100 | Malignant neoplasm of endocervical gland                  |
| cancer | B410z00 | Malignant neoplasm of endocervix NOS                      |
| cancer | B411.00 | Malignant neoplasm of exocervix                           |
| cancer | B412.00 | Malignant neoplasm, overlapping lesion of cervix uteri    |
| cancer | B41y.00 | Malignant neoplasm of other site of cervix                |
| cancer | B41y000 | Malignant neoplasm of cervical stump                      |
| cancer | B41y100 | Malignant neoplasm of squamocolumnar junction cervix      |
| cancer | B41yz00 | Malignant neoplasm of other site of cervix NOS            |
| cancer | B41z.00 | Malignant neoplasm of cervix uteri NOS                    |
| cancer | B42..00 | Malignant neoplasm of placenta                            |
| cancer | B420.00 | Choriocarcinoma                                           |
| cancer | B43..00 | Malignant neoplasm of body of uterus                      |
| cancer | B430.00 | Malignant neoplasm of corpus uteri, excluding isthmus     |
| cancer | B430000 | Malignant neoplasm of cornu of corpus uteri               |
| cancer | B430100 | Malignant neoplasm of fundus of corpus uteri              |
| cancer | B430200 | Malignant neoplasm of endometrium of corpus uteri         |
| cancer | B430211 | Malignant neoplasm of endometrium                         |
| cancer | B430300 | Malignant neoplasm of myometrium of corpus uteri          |
| cancer | B430z00 | Malignant neoplasm of corpus uteri NOS                    |
| cancer | B431.00 | Malignant neoplasm of isthmus of uterine body             |
| cancer | B431000 | Malignant neoplasm of lower uterine segment               |
| cancer | B431z00 | Malignant neoplasm of isthmus of uterine body NOS         |
| cancer | B432.00 | Malignant neoplasm of overlapping lesion of corpus uteri  |
| cancer | B43y.00 | Malignant neoplasm of other site of uterine body          |
| cancer | B43z.00 | Malignant neoplasm of body of uterus NOS                  |
| cancer | B44..00 | Malignant neoplasm of ovary and other uterine adnexa      |
| cancer | B440.00 | Malignant neoplasm of ovary                               |
| cancer | B440.11 | Cancer of ovary                                           |
| cancer | B441.00 | Malignant neoplasm of fallopian tube                      |
| cancer | B442.00 | Malignant neoplasm of broad ligament                      |
| cancer | B443.00 | Malignant neoplasm of parametrium                         |
| cancer | B44y.00 | Malignant neoplasm of other site of uterine adnexa        |
| cancer | B44z.00 | Malignant neoplasm of uterine adnexa NOS                  |
| cancer | B45..00 | Malig neop of other unspecified female genital organs     |
| cancer | B450.00 | Malignant neoplasm of vagina                              |
| cancer | B450100 | Malignant neoplasm of vaginal vault                       |
| cancer | B450z00 | Malignant neoplasm of vagina NOS                          |
| cancer | B451.00 | Malignant neoplasm of labia majora                        |
| cancer | B451000 | Malignant neoplasm greater vestibular (Bartholin's) gland |
| cancer | B451z00 | Malignant neoplasm of labia majora NOS                    |
| cancer | B452.00 | Malignant neoplasm of labia minora                        |
| cancer | B453.00 | Malignant neoplasm of clitoris                            |

|        |         |                                                          |
|--------|---------|----------------------------------------------------------|
| cancer | B454.00 | Malignant neoplasm of vulva unspecified                  |
| cancer | B454.11 | Primary vulval cancer                                    |
| cancer | B45X.00 | Malignant neopl/overlapping lesion/feml genital organs   |
| cancer | B45y.00 | Malignant neoplasm other specified female genital organ  |
| cancer | B45y000 | Malignant neoplasm of overlapping lesion of vulva        |
| cancer | B45z.00 | Malignant neoplasm of female genital organ NOS           |
| cancer | B46..00 | Malignant neoplasm of prostate                           |
| cancer | B47..00 | Malignant neoplasm of testis                             |
| cancer | B470.00 | Malignant neoplasm of undescended testis                 |
| cancer | B470200 | Seminoma of undescended testis                           |
| cancer | B470300 | Teratoma of undescended testis                           |
| cancer | B470z00 | Malignant neoplasm of undescended testis NOS             |
| cancer | B471.00 | Malignant neoplasm of descended testis                   |
| cancer | B471000 | Seminoma of descended testis                             |
| cancer | B471100 | Teratoma of descended testis                             |
| cancer | B471z00 | Malignant neoplasm of descended testis NOS               |
| cancer | B47z.00 | Malignant neoplasm of testis NOS                         |
| cancer | B47z.11 | Seminoma of testis                                       |
| cancer | B47z.12 | Teratoma of testis                                       |
| cancer | B48..00 | Malignant neoplasm of penis other male genital organs    |
| cancer | B480.00 | Malignant neoplasm of prepuce (foreskin)                 |
| cancer | B481.00 | Malignant neoplasm of glans penis                        |
| cancer | B482.00 | Malignant neoplasm of body of penis                      |
| cancer | B483.00 | Malignant neoplasm of penis, part unspecified            |
| cancer | B484.00 | Malignant neoplasm of epididymis                         |
| cancer | B485.00 | Malignant neoplasm of spermatic cord                     |
| cancer | B486.00 | Malignant neoplasm of scrotum                            |
| cancer | B487.00 | Malignant neoplasm, overlapping lesion of penis          |
| cancer | B48y.00 | Malignant neoplasm of other male genital organ           |
| cancer | B48y000 | Malignant neoplasm of seminal vesicle                    |
| cancer | B48y100 | Malignant neoplasm of tunica vaginalis                   |
| cancer | B48y200 | Malignant neoplasm, overlapping lesion male genital orgs |
| cancer | B48yz00 | Malignant neoplasm of other male genital organ NOS       |
| cancer | B48z.00 | Malignant neoplasm of penis other male genital organ     |
| cancer | B49..00 | Malignant neoplasm of urinary bladder                    |
| cancer | B490.00 | Malignant neoplasm of trigone of urinary bladder         |
| cancer | B491.00 | Malignant neoplasm of dome of urinary bladder            |
| cancer | B492.00 | Malignant neoplasm of lateral wall of urinary bladder    |
| cancer | B493.00 | Malignant neoplasm of anterior wall of urinary bladder   |
| cancer | B494.00 | Malignant neoplasm of posterior wall of urinary bladder  |
| cancer | B495.00 | Malignant neoplasm of bladder neck                       |
| cancer | B496.00 | Malignant neoplasm of ureteric orifice                   |
| cancer | B497.00 | Malignant neoplasm of urachus                            |
| cancer | B498.00 | Local recurrence of malignant tumour of urinary bladder  |

|        |         |                                                             |
|--------|---------|-------------------------------------------------------------|
| cancer | B49y.00 | Malignant neoplasm of other site of urinary bladder         |
| cancer | B49y000 | Malignant neoplasm, overlapping lesion of bladder           |
| cancer | B49z.00 | Malignant neoplasm of urinary bladder NOS                   |
| cancer | B4A..00 | Malig neop of kidney other unspecified urinary organs       |
| cancer | B4A..11 | Renal malignant neoplasm                                    |
| cancer | B4A0.00 | Malignant neoplasm of kidney parenchyma                     |
| cancer | B4A0000 | Hypernephroma                                               |
| cancer | B4A1.00 | Malignant neoplasm of renal pelvis                          |
| cancer | B4A1000 | Malignant neoplasm of renal calyces                         |
| cancer | B4A1100 | Malignant neoplasm of ureteropelvic junction                |
| cancer | B4A1z00 | Malignant neoplasm of renal pelvis NOS                      |
| cancer | B4A2.00 | Malignant neoplasm of ureter                                |
| cancer | B4A3.00 | Malignant neoplasm of urethra                               |
| cancer | B4A4.00 | Malignant neoplasm of paraurethral glands                   |
| cancer | B4Ay.00 | Malignant neoplasm of other urinary organs                  |
| cancer | B4Ay000 | Malignant neoplasm overlapping lesion of urinary organs     |
| cancer | B4Az.00 | Malignant neoplasm of kidney or urinary organs NOS          |
| cancer | B4y..00 | Malignant neoplasm of genitourinary organ OS                |
| cancer | B4z..00 | Malignant neoplasm of genitourinary organ NOS               |
| cancer | B5...00 | Malignant neoplasm of other and unspecified sites           |
| cancer | B5...11 | Carcinoma of other and unspecified sites                    |
| cancer | B50..00 | Malignant neoplasm of eye                                   |
| cancer | B500.00 | Malig neop eyeball exc conjunctiva, cornea, retina, choroid |
| cancer | B500000 | Malignant neoplasm of ciliary body                          |
| cancer | B500100 | Malignant neoplasm of iris                                  |
| cancer | B500200 | Malignant neoplasm of crystalline lens                      |
| cancer | B500z00 | Malignant neoplasm of eyeball NOS                           |
| cancer | B501.00 | Malignant neoplasm of orbit                                 |
| cancer | B501000 | Malignant neoplasm of connective tissue of orbit            |
| cancer | B501z00 | Malignant neoplasm of orbit NOS                             |
| cancer | B502.00 | Malignant neoplasm of lacrimal gland                        |
| cancer | B503.00 | Malignant neoplasm of conjunctiva                           |
| cancer | B504.00 | Malignant neoplasm of cornea                                |
| cancer | B505.00 | Malignant neoplasm of retina                                |
| cancer | B506.00 | Malignant neoplasm of choroid                               |
| cancer | B507.00 | Malignant neoplasm of lacrimal duct                         |
| cancer | B507000 | Malignant neoplasm of lacrimal sac                          |
| cancer | B507100 | Malignant neoplasm of nasolacrimal duct                     |
| cancer | B508.00 | Malignant neoplasm, overlapping lesion of eye adnexa        |
| cancer | B509.00 | Malignant melanoma of eye                                   |
| cancer | B50y.00 | Malignant neoplasm of other specified site of eye           |
| cancer | B50z.00 | Malignant neoplasm of eye NOS                               |
| cancer | B51..00 | Malignant neoplasm of brain                                 |
| cancer | B51..11 | Cerebral tumour - malignant                                 |

|        |         |                                                           |
|--------|---------|-----------------------------------------------------------|
| cancer | B510.00 | Malignant neoplasm cerebrum (excl lobes, ventricles)      |
| cancer | B510000 | Malignant neoplasm of basal ganglia                       |
| cancer | B510100 | Malignant neoplasm of cerebral cortex                     |
| cancer | B510300 | Malignant neoplasm of globus pallidus                     |
| cancer | B510400 | Malignant neoplasm of hypothalamus                        |
| cancer | B510500 | Malignant neoplasm of thalamus                            |
| cancer | B510z00 | Malignant neoplasm of cerebrum NOS                        |
| cancer | B511.00 | Malignant neoplasm of frontal lobe                        |
| cancer | B512.00 | Malignant neoplasm of temporal lobe                       |
| cancer | B512000 | Malignant neoplasm of hippocampus                         |
| cancer | B512z00 | Malignant neoplasm of temporal lobe NOS                   |
| cancer | B513.00 | Malignant neoplasm of parietal lobe                       |
| cancer | B514.00 | Malignant neoplasm of occipital lobe                      |
| cancer | B515.00 | Malignant neoplasm of cerebral ventricles                 |
| cancer | B515000 | Malignant neoplasm of choroid plexus                      |
| cancer | B516.00 | Malignant neoplasm of cerebellum                          |
| cancer | B517.00 | Malignant neoplasm of brain stem                          |
| cancer | B517000 | Malignant neoplasm of cerebral peduncle                   |
| cancer | B517100 | Malignant neoplasm of medulla oblongata                   |
| cancer | B517200 | Malignant neoplasm of midbrain                            |
| cancer | B517300 | Malignant neoplasm of pons                                |
| cancer | B517z00 | Malignant neoplasm of brain stem NOS                      |
| cancer | B51y.00 | Malignant neoplasm of other parts of brain                |
| cancer | B51y000 | Malignant neoplasm of corpus callosum                     |
| cancer | B51y200 | Malignant neoplasm, overlapping lesion of brain           |
| cancer | B51yz00 | Malignant neoplasm of other part of brain NOS             |
| cancer | B51z.00 | Malignant neoplasm of brain NOS                           |
| cancer | B52..00 | Malig neop of other unspecified parts of nervous system   |
| cancer | B520.00 | Malignant neoplasm of cranial nerves                      |
| cancer | B520000 | Malignant neoplasm of olfactory bulb                      |
| cancer | B520100 | Malignant neoplasm of optic nerve                         |
| cancer | B520200 | Malignant neoplasm of acoustic nerve                      |
| cancer | B520z00 | Malignant neoplasm of cranial nerves NOS                  |
| cancer | B521.00 | Malignant neoplasm of cerebral meninges                   |
| cancer | B521z00 | Malignant neoplasm of cerebral meninges NOS               |
| cancer | B522.00 | Malignant neoplasm of spinal cord                         |
| cancer | B523.00 | Malignant neoplasm of spinal meninges                     |
| cancer | B523z00 | Malignant neoplasm of spinal meninges NOS                 |
| cancer | B524.00 | Malig neopl peripheral nerves autonomic nervous system    |
| cancer | B524000 | Malignant neoplasm peripheral nerves of head, face neck   |
| cancer | B524100 | Malign neoplasm peripheral nerve, upp limb,incl should    |
| cancer | B524200 | Malign neoplasm of peripheral nerve of low limb, incl hip |
| cancer | B524300 | Malignant neoplasm of peripheral nerve of thorax          |
| cancer | B524400 | Malignant neoplasm of peripheral nerve of abdomen         |

|        |         |                                                           |
|--------|---------|-----------------------------------------------------------|
| cancer | B524500 | Malignant neoplasm of peripheral nerve of pelvis          |
| cancer | B524600 | Malignant neoplasm,overlap lesion periph nerve/auton ns   |
| cancer | B524W00 | Mal neoplasm/periph nerves+autonomic nervous system       |
| cancer | B525.00 | Malignant neoplasm of cauda equina                        |
| cancer | B52W.00 | Malig neopl, overlap lesion brain & other part of CNS     |
| cancer | B52X.00 | Malignant neoplasm of meninges, unspecified               |
| cancer | B52y.00 | Malignant neoplasm of other specified part of nervous sys |
| cancer | B52z.00 | Malignant neoplasm of nervous system NOS                  |
| cancer | B53..00 | Malignant neoplasm of thyroid gland                       |
| cancer | B54..00 | Malig neop of other endocrine glands/related structures   |
| cancer | B540.00 | Malignant neoplasm of adrenal gland                       |
| cancer | B540.11 | Phaeochromocytoma                                         |
| cancer | B540000 | Malignant neoplasm of adrenal cortex                      |
| cancer | B540100 | Malignant neoplasm of adrenal medulla                     |
| cancer | B540z00 | Malignant neoplasm of adrenal gland NOS                   |
| cancer | B541.00 | Malignant neoplasm of parathyroid gland                   |
| cancer | B542.00 | Malignant neopl pituitary gland/craniopharyngeal duct     |
| cancer | B542000 | Malignant neoplasm of pituitary gland                     |
| cancer | B542100 | Malignant neoplasm of craniopharyngeal duct               |
| cancer | B542z00 | Malig neop pituitary gland or craniopharyngeal duct NOS   |
| cancer | B543.00 | Malignant neoplasm of pineal gland                        |
| cancer | B544.00 | Malignant neoplasm of carotid body                        |
| cancer | B545.00 | Malignant neoplasm of aortic body and other paraganglia   |
| cancer | B545000 | Malignant neoplasm of glomus jugulare                     |
| cancer | B545100 | Malignant neoplasm of aortic body                         |
| cancer | B545200 | Malignant neoplasm of coccygeal body                      |
| cancer | B545z00 | Malignant neoplasm of aortic body or paraganglia NOS      |
| cancer | B546.00 | Neuroblastoma                                             |
| cancer | B54X.00 | Malignant neoplasm-pluriglandular involvement,unspecified |
| cancer | B54y.00 | Malignant neoplasm of other specified endocrine gland     |
| cancer | B54z.00 | Malig neop of endocrine gland or related structure NOS    |
| cancer | B55..00 | Malignant neoplasm of other and ill-defined sites         |
| cancer | B550.00 | Malignant neoplasm of head, neck and face                 |
| cancer | B550000 | Malignant neoplasm of head NOS                            |
| cancer | B550100 | Malignant neoplasm of cheek NOS                           |
| cancer | B550200 | Malignant neoplasm of nose NOS                            |
| cancer | B550300 | Malignant neoplasm of jaw NOS                             |
| cancer | B550400 | Malignant neoplasm of neck NOS                            |
| cancer | B550500 | Malignant neoplasm of supraclavicular fossa NOS           |
| cancer | B550z00 | Malignant neoplasm of head, neck and face NOS             |
| cancer | B551.00 | Malignant neoplasm of thorax                              |
| cancer | B551000 | Malignant neoplasm of axilla NOS                          |
| cancer | B551100 | Malignant neoplasm of chest wall NOS                      |
| cancer | B551200 | Malignant neoplasm of intrathoracic site NOS              |

|        |         |                                                         |
|--------|---------|---------------------------------------------------------|
| cancer | B551z00 | Malignant neoplasm of thorax NOS                        |
| cancer | B552.00 | Malignant neoplasm of abdomen                           |
| cancer | B553.00 | Malignant neoplasm of pelvis                            |
| cancer | B553000 | Malignant neoplasm of inguinal region NOS               |
| cancer | B553100 | Malignant neoplasm of presacral region                  |
| cancer | B553200 | Malignant neoplasm of sacrococcygeal region             |
| cancer | B553z00 | Malignant neoplasm of pelvis NOS                        |
| cancer | B554.00 | Malignant neoplasm of upper limb NOS                    |
| cancer | B555.00 | Malignant neoplasm of lower limb NOS                    |
| cancer | B55y.00 | Malignant neoplasm of other specified sites             |
| cancer | B55y000 | Malignant neoplasm of back NOS                          |
| cancer | B55y100 | Malignant neoplasm of trunk NOS                         |
| cancer | B55y200 | Malignant neoplasm of flank NOS                         |
| cancer | B55yz00 | Malignant neoplasm of specified site NOS                |
| cancer | B55z.00 | Malignant neoplasm of other and ill defined site NOS    |
| cancer | B59..00 | Malignant neoplasm of unspecified site                  |
| cancer | B590.00 | Disseminated malignancy NOS                             |
| cancer | B590.11 | Carcinomatosis                                          |
| cancer | B591.00 | Other malignant neoplasm NOS                            |
| cancer | B592.00 | Malignant neopl of independent (primary) multiple sites |
| cancer | B592X00 | Kaposi's sarcoma of multiple organs                     |
| cancer | B593.00 | Primary malignant neoplasm of unknown site              |
| cancer | B595.00 | Malignant tumour of unknown origin                      |
| cancer | B59z.00 | Malignant neoplasm of unspecified site NOS              |
| cancer | B59zX00 | Kaposi's sarcoma, unspecified                           |
| cancer | B5y..00 | Malignant neoplasm of other and unspecified site OS     |
| cancer | B5z..00 | Malignant neoplasm of other and unspecified site NOS    |
| cancer | B6...00 | Malignant neoplasm of lymphatic/haemopoietic tissue     |
| cancer | B6...11 | Malignant neoplasm of histiocytic tissue                |
| cancer | B60..00 | Lymphosarcoma and reticulosarcoma                       |
| cancer | B600.00 | Reticulosarcoma                                         |
| cancer | B600000 | Reticulosarcoma of unspecified site                     |
| cancer | B600100 | Reticulosarcoma of lymph nodes of head, face and neck   |
| cancer | B600300 | Reticulosarcoma of intra-abdominal lymph nodes          |
| cancer | B600700 | Reticulosarcoma of spleen                               |
| cancer | B600z00 | Reticulosarcoma NOS                                     |
| cancer | B601.00 | Lymphosarcoma                                           |
| cancer | B601000 | Lymphosarcoma of unspecified site                       |
| cancer | B601100 | Lymphosarcoma of lymph nodes of head, face and neck     |
| cancer | B601200 | Lymphosarcoma of intrathoracic lymph nodes              |
| cancer | B601300 | Lymphosarcoma of intra-abdominal lymph nodes            |
| cancer | B601500 | Lymphosarcoma of lymph nodes inguinal region and leg    |
| cancer | B601700 | Lymphosarcoma of spleen                                 |
| cancer | B601800 | Lymphosarcoma of lymph nodes of multiple sites          |



|        |         |                                                            |
|--------|---------|------------------------------------------------------------|
| cancer | B601z00 | Lymphosarcoma NOS                                          |
| cancer | B602.00 | Burkitt's lymphoma                                         |
| cancer | B602100 | Burkitt's lymphoma lymph nodes of head, face and neck      |
| cancer | B602200 | Burkitt's lymphoma of intrathoracic lymph nodes            |
| cancer | B602300 | Burkitt's lymphoma of intra-abdominal lymph nodes          |
| cancer | B602500 | Burkitt's lymphoma lymph nodes of inguinal region/leg      |
| cancer | B602z00 | Burkitt's lymphoma NOS                                     |
| cancer | B60y.00 | Other specified reticulosarcoma or lymphosarcoma           |
| cancer | B60z.00 | Reticulosarcoma or lymphosarcoma NOS                       |
| cancer | B61..00 | Hodgkin's dis                                              |
| cancer | B61..11 | Hodgkin lymphoma                                           |
| cancer | B610.00 | Hodgkin's paragranuloma                                    |
| cancer | B610100 | Hodgkin's paragranuloma lymph nodes head, face, neck       |
| cancer | B610300 | Hodgkin's paragranuloma of intra-abdominal lymph nodes     |
| cancer | B611.00 | Hodgkin's granuloma                                        |
| cancer | B611100 | Hodgkin's granuloma of lymph nodes head, face and neck     |
| cancer | B612.00 | Hodgkin's sarcoma                                          |
| cancer | B612400 | Hodgkin's sarcoma of lymph nodes axilla and upper limb     |
| cancer | B613.00 | Hodgkin's dis, lymphocytic-histiocytic predominance        |
| cancer | B613000 | Hodgkin's, lymphocytichistiocytic pred unspec site         |
| cancer | B613100 | Hodgkin's, lymphocytichistiocytic pred of head, face, neck |
| cancer | B613200 | Hodgkin's, lymphocytichistiocytic pred intrathora nodes    |
| cancer | B613300 | Hodgkin's, lymphocytichistiocytic pred intraabdo node      |
| cancer | B613500 | Hodgkin's, lymphocytic-histiocytic pred inguinal and leg   |
| cancer | B613600 | Hodgkin's, lymphocytic-histiocytic pred intrapelvic nodes  |
| cancer | B613700 | Hodgkin's, lymphocytic-histiocytic predominance spleen     |
| cancer | B613800 | Hodgkin's, lymphocytic-histiocytic pred of multiple sites  |
| cancer | B613z00 | Hodgkin's, lymphocytic-histiocytic predominance NOS        |
| cancer | B614.00 | Hodgkin's dis, nodular sclerosis                           |
| cancer | B614000 | Hodgkin's dis, nodular sclerosis of unspecified site       |
| cancer | B614100 | Hodgkin's nodular sclerosis of head, face and neck         |
| cancer | B614200 | Hodgkin's nodular sclerosis of intrathoracic lymph nodes   |
| cancer | B614300 | Hodgkin's nodular sclerosis intraabdominal lymph nodes     |
| cancer | B614400 | Hodgkin's nodular sclerosis lymph nodes of axilla and arm  |
| cancer | B614700 | Hodgkin's dis, nodular sclerosis of spleen                 |
| cancer | B614800 | Hodgkin's nodular sclerosis lymph nodes of multiple sites  |
| cancer | B614z00 | Hodgkin's dis, nodular sclerosis NOS                       |
| cancer | B615.00 | Hodgkin's dis, mixed cellularity                           |
| cancer | B615000 | Hodgkin's dis, mixed cellularity of unspecified site       |
| cancer | B615100 | Hodgkin's mixed cellularity lymph nodes head, face, neck   |
| cancer | B615200 | Hodgkin's mixed cellularity of intrathoracic lymph nodes   |
| cancer | B615500 | Hodgkin's mixed cellularity of lymph nodes inguinal/ leg   |
| cancer | B615z00 | Hodgkin's dis, mixed cellularity NOS                       |
| cancer | B616.00 | Hodgkin's dis, lymphocytic depletion                       |

|        |         |                                                         |
|--------|---------|---------------------------------------------------------|
| cancer | B616000 | Hodgkin's lymphocytic depletion of unspecified site     |
| cancer | B616400 | Hodgkin's lymphocytic depletion lymph nodes axilla/ arm |
| cancer | B616700 | Hodgkin's dis, lymphocytic depletion of spleen          |
| cancer | B616800 | Hodgkin's lymphocytic depletion lymph nodes mult sites  |
| cancer | B616z00 | Hodgkin's dis, lymphocytic depletion NOS                |
| cancer | B617.00 | Nodular lymphocyte predominant Hodgkin lymphoma         |
| cancer | B618.00 | Nodular sclerosis classical Hodgkin lymphoma            |
| cancer | B619.00 | Mixed cellularity classical Hodgkin lymphoma            |
| cancer | B61B.00 | Lymphocyte-rich classical Hodgkin lymphoma              |
| cancer | B61C.00 | Other classical Hodgkin lymphoma                        |
| cancer | B61z.00 | Hodgkin's dis NOS                                       |
| cancer | B61z.11 | Hodgkin lymphoma NOS                                    |
| cancer | B61z000 | Hodgkin's dis NOS, unspecified site                     |
| cancer | B61z100 | Hodgkin's dis NOS of lymph nodes of head, face, neck    |
| cancer | B61z200 | Hodgkin's dis NOS of intrathoracic lymph nodes          |
| cancer | B61z300 | Hodgkin's dis NOS of intra-abdominal lymph nodes        |
| cancer | B61z400 | Hodgkin's dis NOS of lymph nodes of axilla and arm      |
| cancer | B61z500 | Hodgkin's dis NOS of lymph nodes inguinal region, leg   |
| cancer | B61z700 | Hodgkin's dis NOS of spleen                             |
| cancer | B61z800 | Hodgkin's dis NOS of lymph nodes of multiple sites      |
| cancer | B61zz00 | Hodgkin's dis NOS                                       |
| cancer | B62..00 | Other malig neoplasm of lymphoid and histiocytic tissue |
| cancer | B620.00 | Nodular lymphoma (Brill - Symmers dis)                  |
| cancer | B620000 | Nodular lymphoma of unspecified site                    |
| cancer | B620100 | Nodular lymphoma of lymph nodes of head, face, neck     |
| cancer | B620200 | Nodular lymphoma of intrathoracic lymph nodes           |
| cancer | B620300 | Nodular lymphoma of intra-abdominal lymph nodes         |
| cancer | B620500 | Nodular lymphoma of lymph nodes of inguinal region, leg |
| cancer | B620800 | Nodular lymphoma of lymph nodes of multiple sites       |
| cancer | B620z00 | Nodular lymphoma NOS                                    |
| cancer | B621.00 | Mycosis fungoides                                       |
| cancer | B621000 | Mycosis fungoides of unspecified site                   |
| cancer | B621300 | Mycosis fungoides of intra-abdominal lymph nodes        |
| cancer | B621400 | Mycosis fungoides of lymph nodes of axilla, upper limb  |
| cancer | B621500 | Mycosis fungoides of lymph nodes of inguinal region leg |
| cancer | B621800 | Mycosis fungoides of lymph nodes of multiple sites      |
| cancer | B621z00 | Mycosis fungoides NOS                                   |
| cancer | B622.00 | Sezary's dis                                            |
| cancer | B622z00 | Sezary's dis NOS                                        |
| cancer | B623.00 | Malignant histiocytosis                                 |
| cancer | B623000 | Malignant histiocytosis of unspecified site             |
| cancer | B623100 | Malignant histiocytosis of lymph nodes head, face neck  |
| cancer | B623300 | Malignant histiocytosis of intra-abdominal lymph nodes  |
| cancer | B623z00 | Malignant histiocytosis NOS                             |

|        |         |                                                          |
|--------|---------|----------------------------------------------------------|
| cancer | B624.00 | Leukaemic reticuloendotheliosis                          |
| cancer | B624.11 | Leukaemic reticuloendotheliosis                          |
| cancer | B624.12 | Hairy cell leukaemia                                     |
| cancer | B624000 | Leukaemic reticuloendotheliosis of unspecified sites     |
| cancer | B624300 | Leukaemic reticuloend of intra-abdominal lymph nodes     |
| cancer | B624z00 | Leukaemic reticuloendotheliosis NOS                      |
| cancer | B625.00 | Letterer-Siwe dis                                        |
| cancer | B625.11 | Histiocytosis X (acute, progressive)                     |
| cancer | B625000 | Letterer-Siwe dis of unspecified sites                   |
| cancer | B625200 | Letterer-Siwe dis of intrathoracic lymph nodes           |
| cancer | B625800 | Letterer-Siwe dis of lymph nodes of multiple sites       |
| cancer | B625z00 | Letterer-Siwe dis NOS                                    |
| cancer | B626.00 | Malignant mast cell tumours                              |
| cancer | B626000 | Mast cell malignancy of unspecified site                 |
| cancer | B626500 | Mast cell malignancy of lymph nodes inguinal region leg  |
| cancer | B626800 | Mast cell malignancy of lymph nodes of multiple sites    |
| cancer | B626z00 | Malignant mast cell tumour NOS                           |
| cancer | B627.00 | Non - Hodgkin's lymphoma                                 |
| cancer | B627.11 | Non-Hodgkin lymphoma                                     |
| cancer | B627000 | Follicular non-Hodgkin's small cleaved cell lymphoma     |
| cancer | B627100 | Follicular non-Hodg mixed sml cleavd & lge cell lymphoma |
| cancer | B627200 | Follicular non-Hodgkin's large cell lymphoma             |
| cancer | B627300 | Diffuse non-Hodgkin's small cell (diffuse) lymphoma      |
| cancer | B627400 | Diffuse non-Hodgkin's small cleaved cell (diffuse) lymph |
| cancer | B627500 | Diffuse non-Hodgkin mixed sml & lge cell (diffuse) lymph |
| cancer | B627600 | Diffuse non-Hodgkin's immunoblastic (diffuse) lymphoma   |
| cancer | B627700 | Diffuse non-Hodgkin's lymphoblastic (diffuse) lymphoma   |
| cancer | B627800 | Diffuse non-Hodgkin's lymphoma undiff (diffuse)          |
| cancer | B627900 | Mucosa-associated lymphoma                               |
| cancer | B627911 | Maltoma                                                  |
| cancer | B627A00 | Diffuse non-Hodgkin's large cell lymphoma                |
| cancer | B627B00 | Other types of follicular non-Hodgkin's lymphoma         |
| cancer | B627C00 | Follicular non-Hodgkin's lymphoma                        |
| cancer | B627C11 | Follicular lymphoma NOS                                  |
| cancer | B627D00 | Diffuse non-Hodgkin's centroblastic lymphoma             |
| cancer | B627E00 | Diffuse large B-cell lymphoma                            |
| cancer | B627F00 | Extranod marg zone Bcell lymph mucosa-assoc lymph tiss   |
| cancer | B627G00 | Mediastinal (thymic) large B-cell lymphoma               |
| cancer | B627W00 | Unspecified B-cell non-Hodgkin's lymphoma                |
| cancer | B627X00 | Diffuse non-Hodgkin's lymphoma, unspecified              |
| cancer | B628.00 | Follicular lymphoma                                      |
| cancer | B628000 | Follicular lymphoma grade 1                              |
| cancer | B628100 | Follicular lymphoma grade 2                              |
| cancer | B628200 | Follicular lymphoma grade 3                              |

|        |         |                                                           |
|--------|---------|-----------------------------------------------------------|
| cancer | B628300 | Follicular lymphoma grade 3a                              |
| cancer | B628400 | Follicular lymphoma grade 3b                              |
| cancer | B628500 | Diffuse follicle centre lymphoma                          |
| cancer | B628600 | Cutaneous follicle centre lymphoma                        |
| cancer | B628700 | Other types of follicular lymphoma                        |
| cancer | B629.00 | Multifocal multisyste dissem Langerhans-cell histiocytosi |
| cancer | B62A.00 | Sarcoma of dendritic cells                                |
| cancer | B62C.00 | Unifocal Langerhans-cell histiocytosis                    |
| cancer | B62D.00 | Histiocytic sarcoma                                       |
| cancer | B62E.00 | T/NK-cell lymphoma                                        |
| cancer | B62E100 | Anaplastic large cell lymphoma, ALK-positive              |
| cancer | B62E200 | Anaplastic large cell lymphoma, ALK-negative              |
| cancer | B62E300 | Cutaneous T-cell lymphoma                                 |
| cancer | B62E500 | Hepatosplenic T-cell lymphoma                             |
| cancer | B62E600 | Enteropathy-associated T-cell lymphoma                    |
| cancer | B62E700 | Subcutaneous panniculitic T-cell lymphoma                 |
| cancer | B62E800 | Blastic NK-cell lymphoma                                  |
| cancer | B62E900 | Angioimmunoblastic T-cell lymphoma                        |
| cancer | B62EA00 | Primary cutaneous CD30-positive T-cell proliferations     |
| cancer | B62Ew00 | Other mature T/NK-cell lymphoma                           |
| cancer | B62F.00 | Nonfollicular lymphoma                                    |
| cancer | B62F.11 | Non-follicular lymphoma                                   |
| cancer | B62F000 | Small cell B-cell lymphoma                                |
| cancer | B62F100 | Mantle cell lymphoma                                      |
| cancer | B62F200 | Lymphoblastic (diffuse) lymphoma                          |
| cancer | B62x.00 | Malignant lymphoma otherwise specified                    |
| cancer | B62x000 | T-zone lymphoma                                           |
| cancer | B62x100 | Lymphoepithelioid lymphoma                                |
| cancer | B62x200 | Peripheral T-cell lymphoma                                |
| cancer | B62x400 | Malignant reticulosis                                     |
| cancer | B62x500 | Malignant immunoproliferative small intestinal dis        |
| cancer | B62x600 | True histiocytic lymphoma                                 |
| cancer | B62xX00 | Oth and unspecif peripheral cutaneous T-cell lymphomas    |
| cancer | B62y.00 | Malignant lymphoma NOS                                    |
| cancer | B62y000 | Malignant lymphoma NOS of unspecified site                |
| cancer | B62y100 | Malig lymphoma NOS of lymph nodes of head, face, neck     |
| cancer | B62y200 | Malignant lymphoma NOS of intrathoracic lymph nodes       |
| cancer | B62y300 | Malig lymphoma NOS of intra-abdominal lymph nodes         |
| cancer | B62y400 | Malignant lymphoma NOS of lymph nodes of axilla arm       |
| cancer | B62y500 | Malig lymphoma NOS of lymph node inguinal region leg      |
| cancer | B62y600 | Malignant lymphoma NOS of intrapelvic lymph nodes         |
| cancer | B62y700 | Malignant lymphoma NOS of spleen                          |
| cancer | B62y800 | Malignant lymphoma NOS of lymph nodes multiple sites      |
| cancer | B62yz00 | Malignant lymphoma NOS                                    |

|        |         |                                                          |
|--------|---------|----------------------------------------------------------|
| cancer | B62z.00 | Malignant neoplasms of lymphoid and histiocytic tissue   |
| cancer | B62z000 | Unspec malig neop lymphoid/histiocytic of unspec site    |
| cancer | B62z100 | Unspec malig neop lymphoid/hist lymph node head/neck     |
| cancer | B62z200 | Unspec malig neop lymphoid/histioc of intrathoracic node |
| cancer | B62z300 | Unspec malig neop lymphoid/histioc intraabdom nodes      |
| cancer | B62z400 | Unspec malig neop lymph/histioclymph node axilla/arm     |
| cancer | B62z500 | Unspec malig neop lymph/histiocytic nodes inguinal/leg   |
| cancer | B62z800 | Unspec malig neop lymphoid/histiocytic of multiple sites |
| cancer | B62zz00 | Lymphoid and histiocytic malignancy NOS                  |
| cancer | B62zz11 | Immunoproliferative neoplasm                             |
| cancer | B63..00 | Multiple myeloma and immunoproliferative neoplasms       |
| cancer | B630.00 | Multiple myeloma                                         |
| cancer | B630.11 | Kahler's dis                                             |
| cancer | B630.12 | Myelomatosis                                             |
| cancer | B630000 | Malig plasma cell neoplasm, extramedullary plasmacyto    |
| cancer | B630100 | Solitary myeloma                                         |
| cancer | B630200 | Plasmacytoma NOS                                         |
| cancer | B630300 | Lambda light chain myeloma                               |
| cancer | B630400 | Solitary plasmacytoma                                    |
| cancer | B631.00 | Plasma cell leukaemia                                    |
| cancer | B63y.00 | Other immunoproliferative neoplasms                      |
| cancer | B63z.00 | Immunoproliferative neoplasm or myeloma NOS              |
| cancer | B64..00 | Lymphoid leukaemia                                       |
| cancer | B64..11 | Lymphatic leukaemia                                      |
| cancer | B640.00 | Acute lymphoid leukaemia                                 |
| cancer | B640000 | B-cell acute lymphoblastic leukaemia                     |
| cancer | B641.00 | Chronic lymphoid leukaemia                               |
| cancer | B641.11 | Chronic lymphatic leukaemia                              |
| cancer | B641000 | B-cell chronic lymphocytic leukaemia                     |
| cancer | B641011 | Chronic lymphocytic leukaemia of B-cell type             |
| cancer | B641100 | Clinical stage A chronic lymphocytic leukaemia           |
| cancer | B641200 | Clinical stage B chronic lymphocytic leukaemia           |
| cancer | B641300 | Clinical stage C chronic lymphocytic leukaemia           |
| cancer | B642.00 | Subacute lymphoid leukaemia                              |
| cancer | B64y.00 | Other lymphoid leukaemia                                 |
| cancer | B64y100 | Prolymphocytic leukaemia                                 |
| cancer | B64y200 | Adult T-cell leukaemia                                   |
| cancer | B64y300 | B-cell prolymphocytic leukaemia                          |
| cancer | B64y400 | T-cell prolymphocytic leukaemia                          |
| cancer | B64y500 | Adult T-cell lymphoma/leukaemia (HTLV-1-associated)      |
| cancer | B64yz00 | Other lymphoid leukaemia NOS                             |
| cancer | B64z.00 | Lymphoid leukaemia NOS                                   |
| cancer | B65..00 | Myeloid leukaemia                                        |
| cancer | B650.00 | Acute myeloid leukaemia                                  |

|        |         |                                                      |
|--------|---------|------------------------------------------------------|
| cancer | B651.00 | Chronic myeloid leukaemia                            |
| cancer | B651.11 | Chronic granulocytic leukaemia                       |
| cancer | B651000 | Chronic eosinophilic leukaemia                       |
| cancer | B651100 | Chronic myeloid leukaemia, BCR/ABL positive          |
| cancer | B651200 | Chronic neutrophilic leukaemia                       |
| cancer | B651300 | Atypical chronic myeloid leukaemia, BCR/ABL negative |
| cancer | B651z00 | Chronic myeloid leukaemia NOS                        |
| cancer | B652.00 | Subacute myeloid leukaemia                           |
| cancer | B653.00 | Myeloid sarcoma                                      |
| cancer | B653000 | Chloroma                                             |
| cancer | B653100 | Granulocytic sarcoma                                 |
| cancer | B654.00 | Acute myeloblastic leukaemia                         |
| cancer | B65y100 | Acute promyelocytic leukaemia                        |
| cancer | B65yz00 | Other myeloid leukaemia NOS                          |
| cancer | B65z.00 | Myeloid leukaemia NOS                                |
| cancer | B66..00 | Monocytic leukaemia                                  |
| cancer | B66..11 | Histiocytic leukaemia                                |
| cancer | B66..12 | Monoblastic leukaemia                                |
| cancer | B660.00 | Acute monocytic leukaemia                            |
| cancer | B661.00 | Chronic monocytic leukaemia                          |
| cancer | B662.00 | Subacute monocytic leukaemia                         |
| cancer | B663.00 | Acute monoblastic leukaemia                          |
| cancer | B66y.00 | Other monocytic leukaemia                            |
| cancer | B66yz00 | Other monocytic leukaemia NOS                        |
| cancer | B66z.00 | Monocytic leukaemia NOS                              |
| cancer | B67..00 | Other specified leukaemia                            |
| cancer | B670.00 | Acute erythraemia and erythroleukaemia               |
| cancer | B670.11 | Di Guglielmo's dis                                   |
| cancer | B671.00 | Chronic erythraemia                                  |
| cancer | B671.11 | Heilmeyer - Schoner dis                              |
| cancer | B672.00 | Megakaryocytic leukaemia                             |
| cancer | B672.11 | Thrombocytic leukaemia                               |
| cancer | B673.00 | Mast cell leukaemia                                  |
| cancer | B674.00 | Acute panmyelosis                                    |
| cancer | B675.00 | Acute myelofibrosis                                  |
| cancer | B677.00 | Myelodysplastic and myeloproliferative dis           |
| cancer | B67y.00 | Other and unspecified leukaemia                      |
| cancer | B67y000 | Lymphosarcoma cell leukaemia                         |
| cancer | B67yz00 | Other and unspecified leukaemia NOS                  |
| cancer | B67z.00 | Other specified leukaemia NOS                        |
| cancer | B68..00 | Leukaemia of unspecified cell type                   |
| cancer | B680.00 | Acute leukaemia NOS                                  |
| cancer | B681.00 | Chronic leukaemia NOS                                |
| cancer | B682.00 | Subacute leukaemia NOS                               |

|        |         |                                                       |
|--------|---------|-------------------------------------------------------|
| cancer | B68y.00 | Other leukaemia of unspecified cell type              |
| cancer | B68z.00 | Leukaemia NOS                                         |
| cancer | B69..00 | Myelomonocytic leukaemia                              |
| cancer | B690.00 | Acute myelomonocytic leukaemia                        |
| cancer | B691.00 | Chronic myelomonocytic leukaemia                      |
| cancer | B692.00 | Subacute myelomonocytic leukaemia                     |
| cancer | B693.00 | Juvenile myelomonocytic leukaemia                     |
| cancer | B6y..00 | Malignant neoplasm lymphatic or haematopoietic tissue |
| cancer | B6y0.00 | Myeloproliferative disorder                           |
| cancer | B6y0.11 | Myeloproliferative dis                                |
| cancer | B6y1.00 | Myelosclerosis with myeloid metaplasia                |
| cancer | B6z..00 | Malignant neoplasm lymphatic or haematopoietic tissue |
| cancer | B6z0.00 | Kaposi's sarcoma of lymph nodes                       |
| cancer | B8...00 | Carcinoma in situ                                     |
| cancer | B80..00 | Carcinoma in situ of digestive organs                 |
| cancer | B80..11 | Ca-in-situ of G.I. tract                              |
| cancer | B800.00 | Carcinoma in situ of lip, oral cavity and pharynx     |
| cancer | B800.11 | Carcinoma in situ of oral cavity                      |
| cancer | B800.12 | Carcinoma in situ of pharynx                          |
| cancer | B800000 | Carcinoma in situ of lip                              |
| cancer | B800100 | Carcinoma in situ of tongue                           |
| cancer | B800200 | Carcinoma in situ of salivary glands                  |
| cancer | B800300 | Carcinoma in situ of gums                             |
| cancer | B800400 | Carcinoma in situ of floor of mouth                   |
| cancer | B800500 | Carcinoma in situ of cheek                            |
| cancer | B800600 | Carcinoma in situ of palate                           |
| cancer | B800700 | Carcinoma in situ of nasopharynx                      |
| cancer | B800800 | Carcinoma in situ of oropharynx                       |
| cancer | B800900 | Carcinoma in situ of hypopharynx                      |
| cancer | B800z00 | Carcinoma in situ of lip, oral cavity and pharynx NOS |
| cancer | B801.00 | Carcinoma in situ of oesophagus                       |
| cancer | B801000 | Carcinoma in situ of upper 1/3 oesophagus             |
| cancer | B801100 | Carcinoma in situ of middle 1/3 oesophagus            |
| cancer | B801200 | Carcinoma in situ of lower 1/3 oesophagus             |
| cancer | B801z00 | Carcinoma in situ of oesophagus NOS                   |
| cancer | B802.00 | Carcinoma in situ of stomach                          |
| cancer | B802000 | Carcinoma in situ of cardia of stomach                |
| cancer | B802100 | Carcinoma in situ of fundus of stomach                |
| cancer | B802200 | Carcinoma in situ of body of stomach                  |
| cancer | B802300 | Carcinoma in situ of pyloric antrum                   |
| cancer | B802400 | Carcinoma in situ of pyloric canal                    |
| cancer | B802z00 | Carcinoma in situ of stomach NOS                      |
| cancer | B803.00 | Carcinoma in situ of colon                            |
| cancer | B803000 | Carcinoma in situ of hepatic flexure of colon         |

|        |         |                                                            |
|--------|---------|------------------------------------------------------------|
| cancer | B803100 | Carcinoma in situ of transverse colon                      |
| cancer | B803200 | Carcinoma in situ of descending colon                      |
| cancer | B803300 | Carcinoma in situ of sigmoid colon                         |
| cancer | B803400 | Carcinoma in situ of caecum                                |
| cancer | B803500 | Carcinoma in situ of appendix                              |
| cancer | B803600 | Carcinoma in situ of ascending colon                       |
| cancer | B803700 | Carcinoma in situ of splenic flexure of colon              |
| cancer | B803800 | High grade dysplasia of colon                              |
| cancer | B803z00 | Carcinoma in situ of colon NOS                             |
| cancer | B804.00 | Carcinoma in situ of rectum and rectosigmoid junction      |
| cancer | B804000 | Carcinoma in situ of rectosigmoid junction                 |
| cancer | B804100 | Carcinoma in situ of rectum                                |
| cancer | B804z00 | Carcinoma in situ of rectum or rectosigmoid junction NOS   |
| cancer | B805.00 | Carcinoma in situ of anal canal                            |
| cancer | B805000 | Anal intraepithelial neoplasia grade III                   |
| cancer | B806.00 | Carcinoma in situ of anus NOS                              |
| cancer | B807.00 | Carcinoma in situ of other and unspecified small intestine |
| cancer | B807000 | Carcinoma in situ of duodenum                              |
| cancer | B807100 | Carcinoma in situ of jejunum                               |
| cancer | B807200 | Carcinoma in situ of ileum                                 |
| cancer | B807300 | Carcinoma in situ of Meckel's diverticulum                 |
| cancer | B807z00 | Carcinoma in situ other and unspecified small intestine    |
| cancer | B808.00 | Carcinoma in situ of liver and biliary system              |
| cancer | B808.11 | Carcinoma in situ of biliary system                        |
| cancer | B808000 | Carcinoma in situ of liver                                 |
| cancer | B808100 | Carcinoma in situ of intrahepatic bile ducts               |
| cancer | B808200 | Carcinoma in situ of hepatic duct                          |
| cancer | B808300 | Carcinoma in situ of gall bladder                          |
| cancer | B808400 | Carcinoma in situ of cystic duct                           |
| cancer | B808500 | Carcinoma in situ of common bile duct                      |
| cancer | B808600 | Carcinoma in situ of ampulla of Vater                      |
| cancer | B808z00 | Carcinoma in situ of liver or biliary system NOS           |
| cancer | B80z.00 | Carcinoma in situ of other and unspecified digest organs   |
| cancer | B80z000 | Carcinoma in situ of pancreas                              |
| cancer | B80z100 | Carcinoma in situ of spleen                                |
| cancer | B81..00 | Carcinoma in situ of respiratory system                    |
| cancer | B810.00 | Carcinoma in situ of larynx                                |
| cancer | B810000 | Carcinoma in situ of thyroid cartilage                     |
| cancer | B810100 | Carcinoma in situ of cricoid cartilage                     |
| cancer | B810200 | Carcinoma in situ of epiglottis                            |
| cancer | B810300 | Carcinoma in situ of arytenoid cartilage                   |
| cancer | B810600 | Carcinoma in situ of aryepiglottic fold                    |
| cancer | B810700 | Carcinoma in situ of vestibular fold                       |
| cancer | B810800 | Carcinoma in situ of vocal fold - glottis                  |



|        |         |                                                           |
|--------|---------|-----------------------------------------------------------|
| cancer | B810811 | Carcinoma in situ of glottis                              |
| cancer | B810z00 | Carcinoma in situ of larynx NOS                           |
| cancer | B811.00 | Carcinoma in situ of trachea                              |
| cancer | B812.00 | Carcinoma in situ of bronchus and lung                    |
| cancer | B812000 | Carcinoma in situ of carina of bronchus                   |
| cancer | B812100 | Carcinoma in situ of main bronchus                        |
| cancer | B812200 | Carcinoma in situ of upper lobe bronchus and lung         |
| cancer | B812300 | Carcinoma in situ of middle lobe bronchus and lung        |
| cancer | B812400 | Carcinoma in situ of lower lobe bronchus and lung         |
| cancer | B812z00 | Carcinoma in situ of bronchus or lung NOS                 |
| cancer | B81y.00 | Carcinoma in situ other specified part respiratory system |
| cancer | B81y.11 | Carcinoma in situ of nasal sinuses                        |
| cancer | B81y000 | Carcinoma in situ of pleura                               |
| cancer | B81y100 | Carcinoma in situ of nasal cavity                         |
| cancer | B81y400 | Carcinoma in situ of Eustachian tube                      |
| cancer | B81y500 | Carcinoma in situ of mastoid air cells                    |
| cancer | B81y600 | Carcinoma in situ of maxillary sinus                      |
| cancer | B81y700 | Carcinoma in situ of ethmoidal sinus                      |
| cancer | B81y900 | Carcinoma in situ of sphenoidal sinus                     |
| cancer | B81yz00 | Carcinoma in situ of specified parts respiratory system   |
| cancer | B81z.00 | Carcinoma in situ of respiratory organ NOS                |
| cancer | B828.00 | Melanoma in situ of skin                                  |
| cancer | B828000 | Melanoma in situ of lip                                   |
| cancer | B828100 | Melanoma in situ of eyelid, including canthus             |
| cancer | B828200 | Melanoma in situ of ear and external auricular canal      |
| cancer | B828300 | Melanoma in situ of scalp and neck                        |
| cancer | B828400 | Melanoma in situ of trunk                                 |
| cancer | B828500 | Melanoma in situ of upper limb, including shoulder        |
| cancer | B828600 | Melanoma in situ of lower limb, including hip             |
| cancer | B828700 | Melanoma in situ of scalp                                 |
| cancer | B828800 | Melanoma in situ of back of hand                          |
| cancer | B828900 | Melanoma in situ of back                                  |
| cancer | B828W00 | Melanoma in situ, unspecified                             |
| cancer | B828X00 | Melanoma in situ of other and unspecified parts of face   |
| cancer | B83..00 | Carcinoma in situ of breast and genitourinary system      |
| cancer | B830.00 | Carcinoma in situ of breast                               |
| cancer | B830000 | Lobular carcinoma in situ of breast                       |
| cancer | B830100 | Intraductal carcinoma in situ of breast                   |
| cancer | B831.00 | Carcinoma in situ of cervix uteri                         |
| cancer | B831.11 | CIN III - carcinoma in situ of cervix                     |
| cancer | B831.12 | Cervical intraepithelial neoplasia                        |
| cancer | B831.13 | Cervical intraepithelial neoplasia grade III              |
| cancer | B831000 | Carcinoma in situ of endocervix                           |
| cancer | B831100 | Carcinoma in situ of exocervix                            |

|        |         |                                                            |
|--------|---------|------------------------------------------------------------|
| cancer | B832.00 | Carcinoma in situ of other and unspecified parts of uterus |
| cancer | B832.11 | Carcinoma in situ of body of uterus                        |
| cancer | B832000 | Carcinoma in situ of endometrium                           |
| cancer | B833.00 | Carcinoma in situ other unspecified female genital organ   |
| cancer | B833000 | Carcinoma in situ of ovary                                 |
| cancer | B833100 | Carcinoma in situ of fallopian tube                        |
| cancer | B833200 | Carcinoma in situ of vagina                                |
| cancer | B833300 | Carcinoma in situ of vulva                                 |
| cancer | B833311 | Vulval intraepithelial neoplasia                           |
| cancer | B833400 | Vulval intraepithelial neoplasia grade 1                   |
| cancer | B833500 | Vulval intraepithelial neoplasia grade 2                   |
| cancer | B833600 | Vulval intraepithelial neoplasia grade 3                   |
| cancer | B833700 | Vaginal intraepithelial neoplasia grade 1                  |
| cancer | B833800 | Vaginal intraepithelial neoplasia grade 2                  |
| cancer | B833900 | Vaginal intraepithelial neoplasia grade 3                  |
| cancer | B833z00 | Carcinoma in situ of female genital organs NOS             |
| cancer | B834.00 | Carcinoma in situ of prostate                              |
| cancer | B834000 | High grade prostatic intraepithelial neoplasia             |
| cancer | B834100 | Prostatic intraepithelial neoplasia                        |
| cancer | B835.00 | Carcinoma in situ of penis                                 |
| cancer | B836.00 | Carcinoma in situ other unspecified male genital organs    |
| cancer | B836000 | Carcinoma in situ of testis                                |
| cancer | B836300 | Carcinoma in situ of scrotum                               |
| cancer | B837.00 | Carcinoma in situ of bladder                               |
| cancer | B83z.00 | Carcinoma in situ of urinary organs NOS                    |
| cancer | B8y..00 | Carcinoma in situ of other and unspecified sites           |
| cancer | B8y0.00 | Carcinoma in situ of eye                                   |
| cancer | B8yy.00 | Carcinoma in situ of other specified site                  |
| cancer | B8yy000 | Carcinoma in situ of thyroid gland                         |
| cancer | B8yy100 | Carcinoma in situ of adrenal gland                         |
| cancer | B8yy200 | Carcinoma in situ of parathyroid gland                     |
| cancer | B8yy300 | Carcinoma in situ of pituitary gland                       |
| cancer | B8yyz00 | Carcinoma in situ of other specified site NOS              |
| cancer | B8z..00 | Carcinoma in situ NOS                                      |
| cancer | B911000 | Malignant hydatidiform mole                                |
| cancer | B911012 | Invasive mole - placenta                                   |
| cancer | B911013 | Choriocarcinoma                                            |
| cancer | B934.00 | Polycythaemia vera                                         |
| cancer | B934.11 | Polycythaemia rubra vera                                   |
| cancer | B934.12 | Primary polycythaemia                                      |
| cancer | B937.00 | Neop uncertain behaviour lymphatic/haematopoietic tiss     |
| cancer | B937.11 | Neoplasm of uncertain behaviour of blood                   |
| cancer | B937.12 | Idiopathic thrombocythaemia                                |
| cancer | B937.14 | Myelodysplasia                                             |

|        |         |                                                         |
|--------|---------|---------------------------------------------------------|
| cancer | B937000 | Refractory anaemia without sideroblasts, so stated      |
| cancer | B937100 | Refractory anaemia with sideroblasts                    |
| cancer | B937200 | Refractory anaemia with excess of blasts                |
| cancer | B937300 | Refractory anaemia excess of blasts with transformation |
| cancer | B937400 | Essential (haemorrhagic) thrombocythaemia               |
| cancer | B937411 | Primary thrombocythaemia                                |
| cancer | B937500 | Idiopathic thrombocythaemia                             |
| cancer | B937600 | Refractory anaemia without ring sideroblasts            |
| cancer | B937700 | Refractory anaemia with ring sideroblasts               |
| cancer | B937800 | Refractory anaemia with multilineage dysplasia          |
| cancer | B937900 | 5Q minus synde                                          |
| cancer | B937911 | Myelodysplastic synd isolated del(5q) chromos abnorm    |
| cancer | B937W00 | Myelodysplastic synde, unspecified                      |
| cancer | B937W11 | Myelodysplasia                                          |
| cancer | B937X00 | Refractory anaemia, unspecified                         |
| cancer | BB02.00 | [M]Neoplasm, malignant                                  |
| cancer | BB03.12 | [M]Tumour embolus                                       |
| cancer | BB03.13 | [M]Tumour embolism                                      |
| cancer | BB04.00 | [M]Neopl, malig, uncertain whether primary/ metastatic  |
| cancer | BB07.00 | [M]Tumour cells, malignant                              |
| cancer | BB08.00 | [M]Malignant tumour, small cell type                    |
| cancer | BB09.00 | [M]Malignant tumour, giant cell type                    |
| cancer | BB0A.00 | [M]Malignant tumour, fusiform cell type                 |
| cancer | BB11.00 | [M]Carcinoma in situ NOS                                |
| cancer | BB11.11 | [M]Intraepithelial carcinoma NOS                        |
| cancer | BB12.00 | [M]Carcinoma NOS                                        |
| cancer | BB14.00 | [M]Carcinomatosis                                       |
| cancer | BB16.00 | [M]Epithelioma, malignant                               |
| cancer | BB17.00 | [M]Large cell carcinoma NOS                             |
| cancer | BB18.00 | [M]Carcinoma, undifferentiated type, NOS                |
| cancer | BB19.00 | [M]Carcinoma, anaplastic type, NOS                      |
| cancer | BB1A.00 | [M]Pleomorphic carcinoma                                |
| cancer | BB1B.00 | [M]Giant cell and spindle cell carcinoma                |
| cancer | BB1C.00 | [M]Giant cell carcinoma                                 |
| cancer | BB1D.00 | [M]Spindle cell carcinoma                               |
| cancer | BB1E.00 | [M]Pseudosarcomatous carcinoma                          |
| cancer | BB1F.00 | [M]Polygonal cell carcinoma                             |
| cancer | BB1G.00 | [M]Spheroidal cell carcinoma                            |
| cancer | BB1J.00 | [M]Small cell carcinoma NOS                             |
| cancer | BB1J.12 | [M]Round cell carcinoma                                 |
| cancer | BB1K.00 | [M]Oat cell carcinoma                                   |
| cancer | BB1L.00 | [M]Small cell carcinoma, fusiform cell type             |
| cancer | BB1M.00 | [M]Small cell carcinoma, intermediate cell              |
| cancer | BB1N.00 | [M]Small cell-large cell carcinoma                      |

|        |         |                                                                         |
|--------|---------|-------------------------------------------------------------------------|
| cancer | BB1P.00 | [M]Non-small cell carcinoma                                             |
| cancer | BB21.00 | [M]Papillary carcinoma in situ                                          |
| cancer | BB22.00 | [M]Papillary carcinoma NOS                                              |
| cancer | BB24.00 | [M]Verrucous carcinoma NOS                                              |
| cancer | BB24.11 | [M]Verrucous epidermoid carcinoma                                       |
| cancer | BB26.00 | [M]Papillary squamous cell carcinoma                                    |
| cancer | BB26.11 | [M]Papillary epidermoid carcinoma                                       |
| cancer | BB29.00 | [M]Squamous cell carcinoma in situ NOS                                  |
| cancer | BB29.13 | [M]Intraepithelial squamous cell carcinoma                              |
| cancer | BB2A.00 | [M]Squamous cell carcinoma NOS                                          |
| cancer | BB2B.00 | [M]Squamous cell carcinoma, metastatic NOS                              |
| cancer | BB2D.00 | [M]Squamous cell carcinoma, large cell, non-keratinising                |
| cancer | BB2E.00 | [M]Squamous cell carcinoma, small cell, non-keratinising                |
| cancer | BB2G.00 | [M]Adenoid squamous cell carcinoma                                      |
| cancer | BB2H.00 | [M]Squamous cell carcinoma in situ, questionable stromal invasion       |
| cancer | BB2J.00 | [M]Squamous cell carcinoma, microinvasive                               |
| cancer | BB2M.00 | [M]Lymphoepithelial carcinoma                                           |
| cancer | BB2N.00 | [M]Intraepithelial neoplasm, grade III, of cervix, vulva and vagina     |
| cancer | BB42.00 | [M]Transitional cell carcinoma in situ                                  |
| cancer | BB43.00 | [M]Transitional cell carcinoma NOS                                      |
| cancer | BB43.11 | [M]Urothelial carcinoma                                                 |
| cancer | BB46.00 | [M]Schneiderian carcinoma                                               |
| cancer | BB47.00 | [M]Transitional cell carcinoma, spindle cell type                       |
| cancer | BB48.00 | [M]Basaloid carcinoma                                                   |
| cancer | BB49.00 | [M]Cloacogenic carcinoma                                                |
| cancer | BB4A.00 | [M]Papillary transitional cell carcinoma                                |
| cancer | BB4B.00 | [M]Grade 1 (Stage pTa) papillary urothelial/transitional cell carcinoma |
| cancer | BB4C.00 | [M]Grade 2 (Stage pTa) papillary urothelial/transitional cell carcinoma |
| cancer | BB4D.00 | [M]Grade 3 (Stage pTa) papillary urothelial/transitional cell carcinoma |
| cancer | BB4z.00 | [M]Transitional cell papilloma or carcinoma NOS                         |
| cancer | BB5..00 | [M]Adenomas and adenocarcinomas                                         |
| cancer | BB5..11 | [M]Adenocarcinomas                                                      |
| cancer | BB51.00 | [M]Adenocarcinoma in situ                                               |
| cancer | BB51000 | [M]Adenocarcinoma in situ in villous adenoma                            |
| cancer | BB51100 | [M]Adenocarcinoma in situ in tubulovillous adenoma                      |
| cancer | BB52.00 | [M]Adenocarcinoma NOS                                                   |
| cancer | BB52000 | [M]Adenocarcinoma in tubulovillous adenoma                              |
| cancer | BB53.00 | [M]Adenocarcinoma, metastatic, NOS                                      |
| cancer | BB54.00 | [M]Scirrhous adenocarcinoma                                             |
| cancer | BB55.00 | [M]Linitis plastica                                                     |
| cancer | BB56.00 | [M]Superficial spreading adenocarcinoma                                 |
| cancer | BB57.00 | [M]Adenocarcinoma, intestinal type                                      |
| cancer | BB58.00 | [M]Carcinoma, diffuse type                                              |
| cancer | BB5a.00 | [M]Renal adenoma and carcinoma                                          |

|        |         |                                                        |
|--------|---------|--------------------------------------------------------|
| cancer | BB5a000 | [M]Renal cell carcinoma                                |
| cancer | BB5a011 | [M]Grawitz tumour                                      |
| cancer | BB5a012 | [M]Hypernephroma                                       |
| cancer | BB5b.00 | [M]Granular cell carcinoma                             |
| cancer | BB5B.00 | [M]Pancreatic adenomas and carcinomas                  |
| cancer | BB5B011 | [M]Nesidioblastoma                                     |
| cancer | BB5B100 | [M]Islet cell carcinoma                                |
| cancer | BB5B300 | [M]Insulinoma, malignant                               |
| cancer | BB5B500 | [M]Glucagonoma, malignant                              |
| cancer | BB5B600 | [M]Mixed islet cell and exocrine adenocarcinoma        |
| cancer | BB5c.00 | [M]Parathyroid adenomas and adenocarcinomas            |
| cancer | BB5C.00 | [M]Gastrinoma and carcinomas                           |
| cancer | BB5C000 | [M]Gastrinoma NOS                                      |
| cancer | BB5C100 | [M]Gastrinoma, malignant                               |
| cancer | BB5D.00 | [M]Hepatobiliary tract adenomas and carcinomas         |
| cancer | BB5D.11 | [M]Biliary tract adenomas and adenocarcinomas          |
| cancer | BB5D100 | [M]Cholangiocarcinoma                                  |
| cancer | BB5D111 | [M]Bile duct carcinoma                                 |
| cancer | BB5D300 | [M]Bile duct cystadenocarcinoma                        |
| cancer | BB5D500 | [M]Hepatocellular carcinoma NOS                        |
| cancer | BB5D512 | [M]Hepatoma, malignant                                 |
| cancer | BB5D513 | [M]Liver cell carcinoma                                |
| cancer | BB5D700 | [M]Combined hepatocell carcinoma/ cholangiocarcinoma   |
| cancer | BB5D800 | [M]Hepatocellular carcinoma, fibrolamellar             |
| cancer | BB5F.00 | [M]Trabecular adenocarcinoma                           |
| cancer | BB5f.00 | [M]Thyroid adenoma and adenocarcinoma                  |
| cancer | BB5f100 | [M]Follicular adenocarcinoma NOS                       |
| cancer | BB5f111 | [M]Follicular carcinoma                                |
| cancer | BB5f200 | [M]Follicular adenocarcinoma, well differentiated type |
| cancer | BB5f300 | [M]Follicular adenocarcinoma, trabecular type          |
| cancer | BB5f600 | [M]Papillary and follicular adenocarcinoma             |
| cancer | BB5f700 | [M]Nonencapsulated sclerosing carcinoma                |
| cancer | BB5h100 | [M]Adrenal cortical carcinoma                          |
| cancer | BB5J.00 | [M]Adenoid cystic carcinoma                            |
| cancer | BB5j.00 | [M]Endometrioid adenomas and carcinomas                |
| cancer | BB5J.11 | [M]Cylindroid adenocarcinoma                           |
| cancer | BB5j100 | [M]Endometrioid adenoma, borderline malignancy         |
| cancer | BB5j200 | [M]Endometrioid carcinoma                              |
| cancer | BB5j400 | [M]Endometrioid adenofibroma, borderline malignancy    |
| cancer | BB5j500 | [M]Endometrioid adenofibroma, malignant                |
| cancer | BB5K.00 | [M]Cribriform carcinoma                                |
| cancer | BB5L.00 | [M]Adenomatous and adenocarcinomatous polyps           |
| cancer | BB5L100 | [M]Adenocarcinoma in adenomatous polyp                 |
| cancer | BB5L200 | [M]Adenocarcinoma in situ in adenomatous polyp         |

|        |         |                                                   |
|--------|---------|---------------------------------------------------|
| cancer | BB5L300 | [M]Adenocarcinoma in multiple adenomatous polyps  |
| cancer | BB5M.00 | [M]Tubular adenomas and adenocarcinomas           |
| cancer | BB5M100 | [M]Tubular adenocarcinoma                         |
| cancer | BB5N.00 | [M]Adenomatous adenocarcinomatous polyps of colon |
| cancer | BB5N100 | [M]Adenocarcinoma in adenomatous polposis coli    |
| cancer | BB5P.00 | [M]Solid carcinoma NOS                            |
| cancer | BB5R100 | [M]Carcinoid tumour, malignant                    |
| cancer | BB5R500 | [M]Carcinoid tumour, nonargentaffin, malignant    |
| cancer | BB5R600 | [M]Mucocarcinoid tumour, malignant                |
| cancer | BB5R611 | [M]Goblet cell tumour                             |
| cancer | BB5R800 | [M]Adenocarcinoid tumour                          |
| cancer | BB5R900 | [M]Neuroendocrine carcinoma                       |
| cancer | BB5S.00 | [M]Respiratory tract adenomas and adenocarcinomas |
| cancer | BB5S200 | [M]Bronchiolo-alveolar adenocarcinoma             |
| cancer | BB5S211 | [M]Alveolar cell carcinoma                        |
| cancer | BB5S212 | [M]Bronchiolar carcinoma                          |
| cancer | BB5S400 | [M]Alveolar adenocarcinoma                        |
| cancer | BB5T.00 | [M]Papillary adenomas and adenocarcinomas         |
| cancer | BB5T100 | [M]Papillary adenocarcinoma NOS                   |
| cancer | BB5U.00 | [M]Villous adenomas and adenocarcinomas           |
| cancer | BB5U100 | [M]Adenocarcinoma in villous adenoma              |
| cancer | BB5U200 | [M]Villous adenocarcinoma                         |
| cancer | BB5V.00 | [M]Pituitary adenomas and carcinomas              |
| cancer | BB5V100 | [M]Chromophobe carcinoma                          |
| cancer | BB5V311 | [M]Eosinophil carcinoma                           |
| cancer | BB5V700 | [M]Basophil carcinoma                             |
| cancer | BB5V711 | [M]Mucooid cell carcinoma                         |
| cancer | BB5W.00 | [M]Oxyphilic adenomas and adenocarcinomas         |
| cancer | BB5W100 | [M]Oxyphilic adenocarcinoma                       |
| cancer | BB5W111 | [M]Hurthle cell adenocarcinoma                    |
| cancer | BB5W112 | [M]Oncytic adenocarcinoma                         |
| cancer | BB5X.00 | [M]Clear cell adenomas and adenocarcinomas        |
| cancer | BB5X100 | [M]Clear cell adenocarcinoma NOS                  |
| cancer | BB5Y.00 | [M]Hypernephroid tumour                           |
| cancer | BB5y.00 | [M]Adenoma and adenocarcinoms OS                  |
| cancer | BB5y100 | [M]Vipoma                                         |
| cancer | BB5y200 | [M]Klatskin's tumour                              |
| cancer | BB71.00 | [M]Mucoepidermoid carcinoma                       |
| cancer | BB80.00 | [M]Cystadenoma and carcinoma                      |
| cancer | BB80100 | [M]Cystadenocarcinoma NOS                         |
| cancer | BB80200 | [M]Borderline mucinous cystadenoma of the ovary   |
| cancer | BB81100 | [M]Serous cystadenoma, borderline malignancy      |
| cancer | BB81200 | [M]Serous cystadenocarcinoma, NOS                 |
| cancer | BB81400 | [M]Papillary cystadenoma, borderline malignancy   |

|        |         |                                                         |
|--------|---------|---------------------------------------------------------|
| cancer | BB81500 | [M]Papillary cystadenocarcinoma, NOS                    |
| cancer | BB81800 | [M]Papillary serous cystadenocarcinoma                  |
| cancer | BB81A00 | [M]Serous surface papilloma, borderline malignancy      |
| cancer | BB81B00 | [M]Serous surface papillary carcinoma                   |
| cancer | BB81D00 | [M]Mucinous cystadenoma, borderline malignancy          |
| cancer | BB81E00 | [M]Mucinous cystadenocarcinoma NOS                      |
| cancer | BB81E11 | [M]Pseudomucinous adenocarcinoma                        |
| cancer | BB81H00 | [M]Papillary mucinous cystadenocarcinoma                |
| cancer | BB81J00 | [M]Serous cystadenoma, borderline malignancy            |
| cancer | BB81K00 | [M]Papillary cystadenoma, borderline malignancy         |
| cancer | BB81M00 | [M]Papillary serous cystadenoma, borderline malignancy  |
| cancer | BB82.00 | [M]Mucinous adenoma and adenocarcinoma                  |
| cancer | BB82100 | [M]Mucinous adenocarcinoma                              |
| cancer | BB82111 | [M]Colloid adenocarcinoma                               |
| cancer | BB82112 | [M]Gelatinous adenocarcinoma                            |
| cancer | BB82113 | [M]Mucoïd adenocarcinoma                                |
| cancer | BB82114 | [M]Mucous adenocarcinoma                                |
| cancer | BB84.00 | [M]Mucin-producing adenocarcinoma                       |
| cancer | BB85.00 | [M]Signet ring carcinoma                                |
| cancer | BB85000 | [M]Signet ring cell carcinoma                           |
| cancer | BB85100 | [M]Metastatic signet ring cell carcinoma                |
| cancer | BB85111 | [M]Krukenberg tumour                                    |
| cancer | BB85z00 | [M]Signet ring carcinoma NOS                            |
| cancer | BB90.00 | [M]Intraductal carcinoma, noninfiltrating NOS           |
| cancer | BB91.00 | [M]Infiltrating duct carcinoma                          |
| cancer | BB91.11 | [M]Duct carcinoma NOS                                   |
| cancer | BB91000 | [M]Intraductal papillary adenocarcinoma with invasion   |
| cancer | BB91100 | [M]Infiltrating duct and lobular carcinoma              |
| cancer | BB92.00 | [M]Comedocarcinoma, noninfiltrating                     |
| cancer | BB93.00 | [M]Comedocarcinoma NOS                                  |
| cancer | BB94.00 | [M]Juvenile breast carcinoma                            |
| cancer | BB94.11 | [M]Secretory breast carcinoma                           |
| cancer | BB96.00 | [M]Noninfiltrating intraductal papillary adenocarcinoma |
| cancer | BB9B.00 | [M]Medullary carcinoma NOS                              |
| cancer | BB9B.11 | [M]C cell carcinoma                                     |
| cancer | BB9C.00 | [M]Medullary carcinoma with amyloid stroma              |
| cancer | BB9D.00 | [M]Medullary carcinoma with lymphoid stroma             |
| cancer | BB9E.00 | [M]Lobular carcinoma in situ                            |
| cancer | BB9E000 | [M]Intraductal carcinoma and lobular carcinoma in situ  |
| cancer | BB9F.00 | [M]Lobular carcinoma NOS                                |
| cancer | BB9G.00 | [M]Infiltrating ductular carcinoma                      |
| cancer | BB9H.00 | [M]Inflammatory carcinoma                               |
| cancer | BB9J.00 | [M]Paget's dis, mammary                                 |
| cancer | BB9J.11 | [M]Paget's dis, breast                                  |

|        |         |                                                         |
|--------|---------|---------------------------------------------------------|
| cancer | BB9K.00 | [M]Paget's dis and infiltrating breast duct carcinoma   |
| cancer | BB9K000 | [M]Paget's dis and intraductal carcinoma of breast      |
| cancer | BB9L.00 | [M]Paget's dis, extramammary, exc Paget's dis bone      |
| cancer | BB9M.00 | [M]Intracystic carcinoma NOS                            |
| cancer | BBa0.00 | [M]Craniopharyngioma                                    |
| cancer | BBa0.11 | [M]Rathke's pouch tumour                                |
| cancer | BBA2.00 | [M]Acinar cell carcinoma                                |
| cancer | BBa3.00 | [M]Pineoblastoma                                        |
| cancer | BBb..00 | [M]Gliomas                                              |
| cancer | BBb0.00 | [M]Glioma, malignant                                    |
| cancer | BBB0.00 | [M]Adenosquamous carcinoma                              |
| cancer | BBb0.11 | [M]Glioma NOS                                           |
| cancer | BBb0.12 | [M]Gliosarcoma                                          |
| cancer | BBb1.00 | [M]Gliomatosis cerebri                                  |
| cancer | BBb2.00 | [M]Mixed glioma                                         |
| cancer | BBB2.00 | [M]Adenocarcinoma with squamous metaplasia              |
| cancer | BBb2.11 | [M]Mixed glioma                                         |
| cancer | BBb3.00 | [M]Subependymal glioma                                  |
| cancer | BBB3.00 | [M]Adenocarcinoma with cartilaginous osseous metaplasia |
| cancer | BBb3.11 | [M]Subependymal astrocytoma NOS                         |
| cancer | BBb3.12 | [M]Subependymal astrocytoma NOS                         |
| cancer | BBb3.13 | [M]Subependymoma                                        |
| cancer | BBb4.00 | [M]Subependymal giant cell astrocytoma                  |
| cancer | BBB4.00 | [M]Adenocarcinoma with spindle cell metaplasia          |
| cancer | BBB5.00 | [M]Adenocarcinoma with apocrine metaplasia              |
| cancer | BBB6100 | [M]Thymoma, malignant                                   |
| cancer | BBb7.00 | [M]Ependymoma NOS                                       |
| cancer | BBB7.00 | [M]Epithelial-myoepithelial carcinoma                   |
| cancer | BBb8.00 | [M]Ependymoma, anaplastic type                          |
| cancer | BBb8.11 | [M]Ependyoblastoma                                      |
| cancer | BBb9.00 | [M]Papillary ependymoma                                 |
| cancer | BBbA.00 | [M]Myxopapillary ependymoma                             |
| cancer | BBba000 | [M]Peripheral neuroectodermal tumour                    |
| cancer | BBbB.00 | [M]Astrocytoma NOS                                      |
| cancer | BBbB.11 | [M]Astrocytic glioma                                    |
| cancer | BBbC.00 | [M]Astrocytoma, anaplastic type                         |
| cancer | BBbE.00 | [M]Gemistocytic astrocytoma                             |
| cancer | BBbF.00 | [M]Fibrillary astrocytoma                               |
| cancer | BBbG.00 | [M]Pilocytic astrocytoma                                |
| cancer | BBbG.11 | [M]Juvenile astrocytoma                                 |
| cancer | BBbG.12 | [M]Piloid astrocytoma                                   |
| cancer | BBbH.00 | [M]Spongioblastoma NOS                                  |
| cancer | BBbK.00 | [M]Astroblastoma                                        |
| cancer | BBbL.00 | [M]Glioblastoma NOS                                     |



|        |         |                                          |
|--------|---------|------------------------------------------|
| cancer | BBbL.11 | [M]Glioblastoma multiforme               |
| cancer | BBbM.00 | [M]Giant cell glioblastoma               |
| cancer | BBbQ.00 | [M]Oligodendroglioma NOS                 |
| cancer | BBbR.00 | [M]Oligodendroglioma, anaplastic type    |
| cancer | BBbS.00 | [M]Oligodendroblastoma                   |
| cancer | BBbT.00 | [M]Medulloblastoma NOS                   |
| cancer | BBbU.00 | [M]Desmoplastic medulloblastoma          |
| cancer | BBbV.00 | [M]Medullomyoblastoma                    |
| cancer | BBbW.00 | [M]Cerebellar sarcoma NOS                |
| cancer | BBbz.00 | [M]Glioma NOS                            |
| cancer | BBbZ.00 | [M]Pleomorphic xanthoastrocytoma         |
| cancer | BBc3.00 | [M]Teratoid medulloepithelioma           |
| cancer | BBC4.00 | [M]Granulosa cell tumour, malignant      |
| cancer | BBc7.11 | [M]Neuroastrocytoma                      |
| cancer | BBc9.00 | [M]Retinoblastomas                       |
| cancer | BBc9100 | [M]Retinoblastoma, undifferentiated type |
| cancer | BBc9z00 | [M]Retinoblastoma NOS                    |
| cancer | BBCA.00 | [M]Sertoli cell carcinoma                |
| cancer | BBcC.00 | [M]Aesthesioneuroblastoma                |
| cancer | BBcC.11 | [M]Olfactory neuroblastoma               |
| cancer | BBC100  | [M]Leydig cell tumour, malignant         |
| cancer | BBD1.00 | [M]Paraganglioma, malignant              |
| cancer | BBd2.00 | [M]Meningioma, malignant                 |
| cancer | BBd2.11 | [M]Leptomeningeal sarcoma                |
| cancer | BBd2.12 | [M]Meningothelial sarcoma                |
| cancer | BBDA.00 | [M]Pheochromocytoma, malignant           |
| cancer | BBdB.00 | [M]Meningeal sarcomatosis                |
| cancer | BBDB.00 | [M]Glomangiosarcoma                      |
| cancer | BBDB.11 | [M]Glomoid sarcoma                       |
| cancer | BBE..00 | [M]Naevi and melanomas                   |
| cancer | BBE1.00 | [M]Malignant melanoma NOS                |
| cancer | BBE1.11 | [M]Melanocarcinoma                       |
| cancer | BBE1.12 | [M]Melanoma NOS                          |
| cancer | BBE1.13 | [M]Melanosarcoma NOS                     |
| cancer | BBE1.14 | [M]Naevocarcinoma                        |
| cancer | BBE1000 | [M]Malignant melanoma, regressing        |
| cancer | BBE1100 | [M]Desmoplastic melanoma, malignant      |
| cancer | BBE2.00 | [M]Nodular melanoma                      |
| cancer | BBe2.00 | [M]Neurofibrosarcoma                     |
| cancer | BBE4.00 | [M]Balloon cell melanoma                 |
| cancer | BBe7.00 | [M]Neurilemmoma, malignant               |
| cancer | BBe7.11 | [M]Schwannoma, malignant                 |
| cancer | BBE8.11 | [M]Melanocytoma of eyeball               |
| cancer | BBe9.00 | [M]Triton tumour, malignant              |

|        |         |                                                         |
|--------|---------|---------------------------------------------------------|
| cancer | BBEA.00 | [M]Amelanotic melanoma                                  |
| cancer | BBEC.00 | [M]Malignant melanoma in junctional naevus              |
| cancer | BBED.00 | [M]Precancerous melanosis NOS                           |
| cancer | BBEF.00 | [M]Hutchinson's melanotic freckle                       |
| cancer | BBEF.11 | [M]Lentigo maligna                                      |
| cancer | BBEG.00 | [M]Malign melanoma in Hutchinson's melanotic freckle    |
| cancer | BBEG.11 | [M]Lentigo maligna melanoma                             |
| cancer | BBEG000 | [M]Acral lentiginous melanoma, malignant                |
| cancer | BBEH.00 | [M]Superficial spreading melanoma                       |
| cancer | BBEM.00 | [M]Malignant melanoma in giant pigmented naevus         |
| cancer | BBEP.00 | [M]Epithelioid cell melanoma                            |
| cancer | BBEQ.00 | [M]Spindle cell melanoma NOS                            |
| cancer | BBES.00 | [M]Spindle cell melanoma, type B                        |
| cancer | BBET.00 | [M]Mixed epithelioid and spindle melanoma               |
| cancer | BBEV.00 | [M]Blue naevus, malignant                               |
| cancer | BBEX.00 | [M]Melanoma in situ                                     |
| cancer | BBf..00 | [M]Granular cell tumours and alveolar soft part sarcoma |
| cancer | BBF..00 | [M]Soft tissue tumours and sarcomas NOS                 |
| cancer | BBF1.00 | [M]Sarcoma NOS                                          |
| cancer | BBF2.00 | [M]Sarcomatosis NOS                                     |
| cancer | BBf2.00 | [M]Alveolar soft part sarcoma                           |
| cancer | BBF3.00 | [M]Spindle cell sarcoma                                 |
| cancer | BBF4.00 | [M]Giant cell sarcoma (except of bone)                  |
| cancer | BBF4.11 | [M]Pleomorphic cell sarcoma                             |
| cancer | BBF5.00 | [M]Small cell sarcoma                                   |
| cancer | BBF5.11 | [M]Round cell sarcoma                                   |
| cancer | BBF6.00 | [M]Epithelioid cell sarcoma                             |
| cancer | BBFz.00 | [M]Soft tissue tumour or sarcoma NOS                    |
| cancer | BBg..00 | [M]Lymphomas, NOS or diffuse                            |
| cancer | BBg1.00 | [M]Malignant lymphoma NOS                               |
| cancer | BBG1.00 | [M]Fibrosarcoma NOS                                     |
| cancer | BBg1.11 | [M]Lymphoma NOS                                         |
| cancer | BBg1000 | [M]Malignant lymphoma, diffuse NOS                      |
| cancer | BBg2.00 | [M]Malignant lymphoma, non Hodgkin's type               |
| cancer | BBg2.11 | [M]Non Hodgkins lymphoma                                |
| cancer | BBg3.00 | [M]Malignant lymphoma, undifferentiated cell type NOS   |
| cancer | BBG3.00 | [M]Fibromyxosarcoma                                     |
| cancer | BBg4.00 | [M]Malignant lymphoma, stem cell type                   |
| cancer | BBg5.00 | [M]Malignant lymphoma, convoluted cell type NOS         |
| cancer | BBg6.00 | [M]Lymphosarcoma NOS                                    |
| cancer | BBg7.00 | [M]Malignant lymphoma, lymphoplasmacytoid type          |
| cancer | BBg8.00 | [M]Malignant lymphoma, immunoblastic type               |
| cancer | BBG8.00 | [M]Infantile fibrosarcoma                               |
| cancer | BBG8.11 | [M]Congenital fibrosarcoma                              |

|        |         |                                                         |
|--------|---------|---------------------------------------------------------|
| cancer | BBgA.00 | [M]Malignant lymphoma, centroblastic-centrocytic, diff  |
| cancer | BBgB.00 | [M]Malignant lymphoma, follicular centre cell NOS       |
| cancer | BBgC.00 | [M]Malignant lymphoma, lymphocytic, well differentiated |
| cancer | BBgC.11 | [M]Lymphocytic lymphoma NOS                             |
| cancer | BBgC.12 | [M]Lymphocytic lymphosarcoma NOS                        |
| cancer | BBgD.00 | [M]Malig lymphoma, lymphocytic, intermediate different  |
| cancer | BBgE.00 | [M]Malignant lymphoma, centrocytic                      |
| cancer | BBGF.00 | [M]Fibrous histiocytoma, malignant                      |
| cancer | BBgG.00 | [M]Malignant lymphoma, lymphocytic, poorly different    |
| cancer | BBgG.11 | [M]Lymphoblastic lymphosarcoma NOS                      |
| cancer | BBgG.12 | [M]Lymphoblastic lymphoma NOS                           |
| cancer | BBgG.13 | [M]Lymphoblastoma NOS                                   |
| cancer | BBgH.00 | [M]Prolymphocytic lymphosarcoma                         |
| cancer | BBgJ.00 | [M]Malignant lymphoma, centroblastic type NOS           |
| cancer | BBGJ.00 | [M]Fibroxsanthoma, malignant                            |
| cancer | BBgJ.11 | [M]Germinoblastic sarcoma NOS                           |
| cancer | BBGJ.11 | [M]Fibroxsanthosarcoma                                  |
| cancer | BBgK.00 | [M]Malig lymphoma, follicular centre cell, non-cleaved  |
| cancer | BBgL.00 | [M]Malignant lymphoma, small lymphocytic NOS            |
| cancer | BBgM.00 | [M]Malignant lymphoma, small cleaved cell, diffuse      |
| cancer | BBGM.00 | [M]Dermatofibrosarcoma NOS                              |
| cancer | BBgN.00 | [M]Malign lymph,lymphocy,intermediate differrn, diffuse |
| cancer | BBgP.00 | [M]Malignant lymphoma, mixed small large cell, diffuse  |
| cancer | BBGP.00 | [M]Pigmented dermatofibrosarcoma protuberans            |
| cancer | BBgQ.00 | [M]Malignant lymphomatous polyposis                     |
| cancer | BBgR.00 | [M]Malignant lymphoma, large cell, diffuse NOS          |
| cancer | BBgS.00 | [M]Malignant lymphoma, large cell, cleaved, diffuse     |
| cancer | BBgT.00 | [M]Malignant lymphoma, large cell, noncleaved, diffuse  |
| cancer | BBgV.00 | [M]Malignant lymphoma, small cell, noncleaved, diffuse  |
| cancer | BBgz.00 | [M]Lymphoma, diffuse or NOS                             |
| cancer | BBh..00 | [M]Reticulosarcomas                                     |
| cancer | BBh0.00 | [M]Reticulosarcoma NOS                                  |
| cancer | BBh0.11 | [M]Reticulum cell sarcoma NOS                           |
| cancer | BBH1.00 | [M]Myxosarcoma                                          |
| cancer | BBh2.00 | [M]Reticulosarcoma, nodular                             |
| cancer | BBj..00 | [M]Hodgkin's dis                                        |
| cancer | BBj0.00 | [M]Hodgkin's dis NOS                                    |
| cancer | BBj0.11 | [M]Lymphogranuloma, malignant                           |
| cancer | BBj1.00 | [M]Hodgkin's dis, lymphocytic predominance              |
| cancer | BBJ1.00 | [M]Liposarcoma NOS                                      |
| cancer | BBJ1.11 | [M]Fibroliposarcoma                                     |
| cancer | BBj1000 | [M]Hodgkin,s dis, lymphocytic predominance, diffuse     |
| cancer | BBj1100 | [M]Hodgkin,s dis, lymphocytic pred, nodular             |
| cancer | BBj2.00 | [M]Hodgkin's dis, mixed cellularity                     |

|        |         |                                                             |
|--------|---------|-------------------------------------------------------------|
| cancer | BBJ3.00 | [M]Liposarcoma, well differentiated type                    |
| cancer | BBj4.00 | [M]Hodgkin's dis,lymphoc depletion,diffuse fibrosis         |
| cancer | BBJ5.00 | [M]Myxoid liposarcoma                                       |
| cancer | BBJ5.12 | [M]Myxoliposarcoma                                          |
| cancer | BBj6.00 | [M]Hodgkin's dis, nodular sclerosis NOS                     |
| cancer | BBJ6.00 | [M]Round cell liposarcoma                                   |
| cancer | BBj6000 | [M]Hodgkin,s dis, nodular sclerosis, lymphoc predom         |
| cancer | BBj6100 | [M]Hodgkin,s dis, nodular sclerosis, mixed cellularity      |
| cancer | BBj6200 | [M]Hodgkin,s dis, nodular sclerosis, lymphoc deplet         |
| cancer | BBj7.00 | [M]Hodgkin's dis, nodular sclerosis, cellular phase         |
| cancer | BBJ7.00 | [M]Pleomorphic liposarcoma                                  |
| cancer | BBJ8.00 | [M]Mixed type liposarcoma                                   |
| cancer | BBj9.00 | [M]Hodgkin's granuloma                                      |
| cancer | BBJH.00 | [M]Dedifferentiated liposarcoma                             |
| cancer | BBjz.00 | [M]Hodgkin's dis NOS                                        |
| cancer | BBk..00 | [M]Lymphomas, nodular or follicular                         |
| cancer | BBk0.00 | [M]Malignant lymphoma, nodular NOS                          |
| cancer | BBk0.11 | [M]Brill - Symmers' dis                                     |
| cancer | BBk0.12 | [M]Follicular lymphosarcoma NOS                             |
| cancer | BBk0.13 | [M]Giant follicular lymphoma                                |
| cancer | BBK0200 | [M]Leiomyosarcoma NOS                                       |
| cancer | BBK0311 | [M]Leiomyoblastoma                                          |
| cancer | BBK0400 | [M]Epithelioid leiomyosarcoma                               |
| cancer | BBK0700 | [M]Myxoid leiomyosarcoma                                    |
| cancer | BBK1100 | [M]Angiomyosarcoma                                          |
| cancer | BBk2.00 | [M]Malignant lymph, centroblastic-centrocytic, follicular   |
| cancer | BBK2.00 | [M]Myoma and myosarcoma                                     |
| cancer | BBK2100 | [M]Myosarcoma                                               |
| cancer | BBk3.00 | [M]Malig lymph, lymphoc, well differentiated ,nodular       |
| cancer | BBK3100 | [M]Rhabdomyosarcoma NOS                                     |
| cancer | BBK3200 | [M]Pleomorphic rhabdomyosarcoma                             |
| cancer | BBK3300 | [M]Mixed cell rhabdomyosarcoma                              |
| cancer | BBK3600 | [M]Embryonal rhabdomyosarcoma                               |
| cancer | BBK3611 | [M]Sarcoma botryoides                                       |
| cancer | BBK3700 | [M]Alveolar rhabdomyosarcoma                                |
| cancer | BBk5.00 | [M]Malig lymph, follicular centre cell, cleaved, follicular |
| cancer | BBk7.00 | [M]Malignant lymphoma, centroblastic type, follicular       |
| cancer | BBk8.00 | [M]Malig lymph,follicular centre cell,noncleaved,follicular |
| cancer | BBkz.00 | [M]Lymphoma, nodular or follicular NOS                      |
| cancer | BBl..00 | [M]Mycosis fungoides                                        |
| cancer | BBl0.00 | [M]Mycosis fungoides                                        |
| cancer | BBL0.00 | [M]Endometrial stromal sarcoma                              |
| cancer | BBl1.00 | [M]Sezary's dis                                             |
| cancer | BBL4.00 | [M]Mixed tumour, malignant, NOS                             |

|        |         |                                                         |
|--------|---------|---------------------------------------------------------|
| cancer | BBL7.00 | [M]Mixed and stromal renal neoplasms                    |
| cancer | BBL7.11 | [M]Nephromas and nephroblastomas                        |
| cancer | BBL7000 | [M]Mesoblastic nephroma                                 |
| cancer | BBL7100 | [M]Nephroblastoma NOS                                   |
| cancer | BBL7111 | [M]Adenosarcoma                                         |
| cancer | BBL7112 | [M]Wilms' tumour                                        |
| cancer | BBL7200 | [M]Epithelial nephroblastoma                            |
| cancer | BBL7300 | [M]Mesenchymal nephroblastoma                           |
| cancer | BBL8.00 | [M]Hepatoblastoma                                       |
| cancer | BBL8.11 | [M]Embryonal hepatoma                                   |
| cancer | BBL9.00 | [M]Carcinosarcoma NOS                                   |
| cancer | BBLA.00 | [M]Carcinosarcoma, embryonal type                       |
| cancer | BBLA.11 | [M]Pneumoblastoma                                       |
| cancer | BBLC100 | [M]Mesenchymoma, malignant                              |
| cancer | BBLD.00 | [M]Embryonal sarcoma                                    |
| cancer | BBLE.00 | [M]Adenosarcoma                                         |
| cancer | BBLG.00 | [M]Carcinoma in pleomorphic adenoma                     |
| cancer | BBLH.00 | [M]Rhabdoid sarcoma                                     |
| cancer | BBLJ.00 | [M]Clear cell sarcoma of kidney                         |
| cancer | BBLM.00 | [M]Pulmonary blastoma                                   |
| cancer | BBlz.00 | [M]Mycosis fungoides NOS                                |
| cancer | BBm0.00 | [M]Microglioma                                          |
| cancer | BBM0000 | [M]Brenner tumour, borderline malignancy                |
| cancer | BBM0100 | [M]Brenner tumour, malignant                            |
| cancer | BBm1.00 | [M]Malignant histiocytosis                              |
| cancer | BBm1.11 | [M]Malignant reticulosis                                |
| cancer | BBm3.00 | [M]Letterer - Siwe dis                                  |
| cancer | BBm3.12 | [M]Acute progressive histiocytosis X                    |
| cancer | BBm4.00 | [M]True histiocytic lymphoma                            |
| cancer | BBm5.00 | [M] Peripheral T-cell lymphoma NOS                      |
| cancer | BBM8.00 | [M]Cystosarcoma phyllodes NOS                           |
| cancer | BBm9.00 | [M] Monocytoid B-cell lymphoma                          |
| cancer | BBM9.00 | [M]Cystosarcoma phyllodes, malignant                    |
| cancer | BBmA.00 | [M] Refractory anaemia with sideroblasts                |
| cancer | BBmB.00 | [M]Refract anaemia+excess of blasts with transformation |
| cancer | BBmC.00 | [M] T-gamma lymphoproliferative dis                     |
| cancer | BBmD.00 | [M] Cutaneous lymphoma                                  |
| cancer | BBmE.00 | [M] Gamma heavy chain dis                               |
| cancer | BBmF.00 | [M] Angiocentric immunoproliferative lesion             |
| cancer | BBmH.00 | [M] Large cell lymphoma                                 |
| cancer | BBmJ.00 | [M] Angioendotheliomatosis                              |
| cancer | BBmK.00 | [M]Waldenstrom's macroglobulinaemia                     |
| cancer | BBmL.00 | [M] Refractory anaemia with excess of blasts            |
| cancer | BBn0.00 | [M]Plasma cell myeloma                                  |

|        |         |                                                  |
|--------|---------|--------------------------------------------------|
| cancer | BBn0.11 | [M]Multiple myeloma                              |
| cancer | BBn0.12 | [M]Myeloma NOS                                   |
| cancer | BBn0.13 | [M]Myelomatosis                                  |
| cancer | BBn0.14 | [M]Plasmacytic myeloma                           |
| cancer | BBN1.00 | [M]Synovial sarcoma NOS                          |
| cancer | BBN2.00 | [M]Synovial sarcoma, spindle cell type           |
| cancer | BBn3.00 | [M]Plasma cell tumour, malignant                 |
| cancer | BBN4.00 | [M]Synovial sarcoma, biphasic type               |
| cancer | BBN5.00 | [M]Clear cell sarcoma of tendons and aponeuroses |
| cancer | BBp1.00 | [M]Mast cell sarcoma                             |
| cancer | BBP1.00 | [M]Mesothelioma, malignant                       |
| cancer | BBp2.00 | [M]Malignant mastocytosis                        |
| cancer | BBP3.11 | [M]Sarcomatoid mesothelioma                      |
| cancer | BBP5.00 | [M]Epithelioid mesothelioma, malignant           |
| cancer | BBP7.00 | [M]Mesothelioma, biphasic type, malignant        |
| cancer | BBPX.00 | [M]Mesothelioma, unspecified                     |
| cancer | BBQ1.00 | [M]Seminomas                                     |
| cancer | BBQ1000 | [M]Seminoma, anaplastic type                     |
| cancer | BBQ1100 | [M]Spermatocytic seminoma                        |
| cancer | BBQ1z00 | [M]Seminoma NOS                                  |
| cancer | BBQ3.00 | [M]Embryonal carcinoma NOS                       |
| cancer | BBQ4.00 | [M]Endodermal sinus tumour                       |
| cancer | BBQ4.11 | [M]Infantile embryonal carcinoma                 |
| cancer | BBQ4.12 | [M]Orchioblastoma                                |
| cancer | BBQ4.14 | [M]Yolk sac tumour                               |
| cancer | BBQ6.00 | [M]Gonadoblastoma                                |
| cancer | BBQ7200 | [M]Teratoma, malignant, NOS                      |
| cancer | BBQ7211 | [M]Embryonal teratoma                            |
| cancer | BBQ7212 | [M]Immature teratoma                             |
| cancer | BBQ7213 | [M]Teratoblastoma, malignant                     |
| cancer | BBQ7300 | [M]Teratocarcinoma                               |
| cancer | BBQ7400 | [M]Malignant teratoma, undifferentiated type     |
| cancer | BBQ7500 | [M]Malignant teratoma, intermediate type         |
| cancer | BBQ9.00 | [M]Dermoid cyst with malignant transformation    |
| cancer | BBQA100 | [M]Struma ovarii, malignant                      |
| cancer | BBr..00 | [M]Leukaemias                                    |
| cancer | BBr0.00 | [M]Leukaemias unspecified                        |
| cancer | BBr0000 | [M]Leukaemia NOS                                 |
| cancer | BBr0100 | [M]Acute leukaemia NOS                           |
| cancer | BBr0111 | [M]Blast cell leukaemia                          |
| cancer | BBr0112 | [M]Blastic leukaemia                             |
| cancer | BBr0113 | [M]Stem cell leukaemia                           |
| cancer | BBr0200 | [M]Subacute leukaemia NOS                        |
| cancer | BBr0300 | [M]Chronic leukaemia NOS                         |

|        |         |                                           |
|--------|---------|-------------------------------------------|
| cancer | BBR0400 | [M]Aleukaemic leukaemia NOS               |
| cancer | BBR0z00 | [M]Leukaemia unspecified, NOS             |
| cancer | BBR1.00 | [M]Invasive hydatidiform mole             |
| cancer | BBR1.11 | [M]Chorioadenoma                          |
| cancer | BBR1.12 | [M]Chorioadenoma destruens                |
| cancer | BBR1.13 | [M]Invasive mole NOS                      |
| cancer | BBR2.00 | [M]Lymphoid leukaemias                    |
| cancer | BBR2.00 | [M]Choriocarcinoma                        |
| cancer | BBR2000 | [M]Lymphoid leukaemia NOS                 |
| cancer | BBR2011 | [M]Lymphatic leukaemia                    |
| cancer | BBR2100 | [M]Acute lymphoid leukaemia               |
| cancer | BBR2300 | [M]Chronic lymphoid leukaemia             |
| cancer | BBR2500 | [M]Prolymphocytic leukaemia               |
| cancer | BBR2600 | [M]Burkitt's cell leukaemia               |
| cancer | BBR2700 | [M]Adult T-cell leukaemia/lymphoma        |
| cancer | BBR3.00 | [M]Plasma cell leukaemias                 |
| cancer | BBR3.00 | [M]Choriocarcinoma combined with teratoma |
| cancer | BBR4.00 | [M]Erythroleukaemias                      |
| cancer | BBR4.00 | [M]Malignant teratoma, trophoblastic      |
| cancer | BBR4000 | [M]Erythroleukaemia                       |
| cancer | BBR4z00 | [M]Erythroleukaemia NOS                   |
| cancer | BBR5.00 | [M]Partial hydatidiform mole              |
| cancer | BBR6.00 | [M]Myeloid leukaemias                     |
| cancer | BBR6.00 | [M]Placental site trophoblastic tumour    |
| cancer | BBR6000 | [M]Myeloid leukaemia NOS                  |
| cancer | BBR6011 | [M]Granulocytic leukaemia NOS             |
| cancer | BBR6100 | [M]Acute myeloid leukaemia                |
| cancer | BBR6200 | [M]Subacute myeloid leukaemia             |
| cancer | BBR6300 | [M]Chronic myeloid leukaemia              |
| cancer | BBR6311 | [M]Naegeli-type monocytic leukaemia       |
| cancer | BBR6600 | [M]Acute promyelocytic leukaemia          |
| cancer | BBR6700 | [M]Acute myelomonocytic leukaemia         |
| cancer | BBR6800 | [M]Chronic myelomonocytic leukaemia       |
| cancer | BBR6900 | [M]Juvenile myelomonocytic leukaemia      |
| cancer | BBR6z00 | [M]Other myeloid leukaemia NOS            |
| cancer | BBR7.00 | [M]Classical hydatidiform mole            |
| cancer | BBR7000 | [M]Basophilic leukaemia                   |
| cancer | BBR8.00 | [M]Eosinophilic leukaemias                |
| cancer | BBR8.00 | [M]Complete hydatidiform mole             |
| cancer | BBR8000 | [M]Eosinophilic leukaemia                 |
| cancer | BBR8z00 | [M]Eosinophilic leukaemia NOS             |
| cancer | BBR9000 | [M]Monocytic leukaemia NOS                |
| cancer | BBRA.00 | [M]Miscellaneous leukaemias               |
| cancer | BBRA100 | [M]Megakaryocytic leukaemia               |

|        |         |                                                          |
|--------|---------|----------------------------------------------------------|
| cancer | BBrA111 | [M]Thrombocytic leukaemia                                |
| cancer | BBrA300 | [M]Myeloid sarcoma                                       |
| cancer | BBrA311 | [M]Chloroma                                              |
| cancer | BBrA312 | [M]Granulocytic sarcoma                                  |
| cancer | BBrA400 | [M]Hairy cell leukaemia                                  |
| cancer | BBrA500 | [M]Acute megakaryoblastic leukaemia                      |
| cancer | BBrA600 | [M]Acute panmyelosis                                     |
| cancer | BBrA700 | [M]Acute myelofibrosis                                   |
| cancer | BBrAz00 | [M]Miscellaneous leukaemia NOS                           |
| cancer | BBrz.00 | [M]Leukaemia NOS                                         |
| cancer | BBRz.00 | [M]Trophoblastic neoplasm NOS                            |
| cancer | BBS..00 | [M]Mesonephromas                                         |
| cancer | BBs..00 | [M]Misc myeloproliferative/lymphoproliferative disorders |
| cancer | BBs0.00 | [M]Polycythaemia vera                                    |
| cancer | BBs0.11 | [M]Polycythaemia rubra vera                              |
| cancer | BBs1.00 | [M]Acute panmyelosis                                     |
| cancer | BBs2.00 | [M]Chronic myeloproliferative dis                        |
| cancer | BBs4.00 | [M]Idiopathic thrombocythaemia                           |
| cancer | BBs5.00 | [M]Chronic lymphoproliferative dis                       |
| cancer | BBsz.00 | [M]Misc myeloproliferative/ lymphoproliferative dis NOS  |
| cancer | BBT1.00 | [M]Haemangiosarcoma                                      |
| cancer | BBT1.11 | [M]Angiosarcoma                                          |
| cancer | BBT7100 | [M]Haemangioendothelioma, malignant                      |
| cancer | BBTA.00 | [M]Kaposi's sarcoma                                      |
| cancer | BBTD200 | [M]Haemangiopericytoma, malignant                        |
| cancer | BBTK.00 | [M]Epithelioid haemangioendothelioma, malignant          |
| cancer | BBU1.00 | [M]Lymphangiosarcoma                                     |
| cancer | BBV..00 | [M]Osteomas and osteosarcomas                            |
| cancer | BBv..00 | [M]Myelodysplastic synde                                 |
| cancer | BBV..11 | [M]Juxtacortical osteogenic sarcoma                      |
| cancer | BBV..12 | [M]Parosteal osteosarcoma                                |
| cancer | BBV..13 | [M]Periosteal osteogenic sarcoma                         |
| cancer | BBv0.00 | [M]Monocytoid B-cell lymphoma                            |
| cancer | BBV1.00 | [M]Osteosarcoma NOS                                      |
| cancer | BBV1.11 | [M]Osteoblastic sarcoma                                  |
| cancer | BBV1.12 | [M]Osteochondrosarcoma                                   |
| cancer | BBV1.13 | [M]Osteogenic sarcoma NOS                                |
| cancer | BBV2.00 | [M]Chondroblastic osteosarcoma                           |
| cancer | BBv2.00 | [M]AngiocentricT-cell lymphoma                           |
| cancer | BBV3.00 | [M]Fibroblastic osteosarcoma                             |
| cancer | BBV4.00 | [M]Telangiectatic osteosarcoma                           |
| cancer | BBV5.00 | [M]Osteosarcoma in Paget's dis of bone                   |
| cancer | BBV9.00 | [M]Myxoid chondrosarcoma                                 |
| cancer | BBVA.00 | [M] Small cell osteosarcoma                              |



|        |         |                                                             |
|--------|---------|-------------------------------------------------------------|
| cancer | BBW4.00 | [M]Chondrosarcoma NOS                                       |
| cancer | BBW4.11 | [M]Fibrochondrosarcoma                                      |
| cancer | BBW6.00 | [M]Juxtacortical chondrosarcoma                             |
| cancer | BBW8.00 | [M]Chondroblastoma, malignant                               |
| cancer | BBW9.00 | [M]Mesenchymal chondrosarcoma                               |
| cancer | BBX1.00 | [M]Giant cell tumour of bone, malignant                     |
| cancer | BBX1.11 | [M]Giant cell bone sarcoma                                  |
| cancer | BBX1.12 | [M]Osteoclastoma, malignant                                 |
| cancer | BBX3.00 | [M]Malignant giant cell tumour of soft parts                |
| cancer | BBY0.00 | [M]Ewing's sarcoma                                          |
| cancer | BBY0.11 | [M]Endothelial bone sarcoma                                 |
| cancer | BBZ2.00 | [M]Odontogenic tumour, malignant                            |
| cancer | BBZ2.11 | [M]Intraosseous carcinoma                                   |
| cancer | BBZC.00 | [M]Ameloblastic odontosarcoma                               |
| cancer | BBZG.00 | [M]Ameloblastoma, malignant                                 |
| cancer | BBZG.11 | [M]Adamantinoma, malignant                                  |
| cancer | BBZN.00 | [M]Ameloblastic fibrosarcoma                                |
| cancer | BBZN.11 | [M]Odontogenic fibrosarcoma                                 |
| cancer | Byu0.00 | [X]Malignant neoplasm of lip, oral cavity and pharynx       |
| cancer | Byu1.00 | [X]Malignant neoplasm of digestive organs                   |
| cancer | Byu1100 | [X]Other specified carcinomas of liver                      |
| cancer | Byu1200 | [X]Malignant neoplasm of intestinal tract, part unsp        |
| cancer | Byu1300 | [X]Malignant neoplasm/ill-defin sites within digestive syst |
| cancer | Byu2.00 | [X]Malignant neoplasm of respiratory intrathoracic organ    |
| cancer | Byu2000 | [X]Malignant neoplasm of bronchus or lung, unspecified      |
| cancer | Byu2100 | [X]Malignant neoplasm/overlap les/heart,mediast+pleura      |
| cancer | Byu2300 | [X]Malign neopl/overlapping les/resp+intrathoracic organ    |
| cancer | Byu2400 | [X]Malignant neoplasm/ill-defined sites within resp syst    |
| cancer | Byu2500 | [X]Malignant neoplasm of mediastinum, part unspecified      |
| cancer | Byu3.00 | [X]Malignant neoplasm of bone and articular cartilage       |
| cancer | Byu3100 | [X]Malig neoplasm/bones+articular cartilage/limb,unspfd     |
| cancer | Byu3200 | [X]Malignant neopl/overlap lesion/bone+articulr cartilage   |
| cancer | Byu3300 | [X]Malignant neoplasm/bone+articular cartilage, unspec      |
| cancer | Byu4000 | [X]Malignant melanoma of other+unspecified parts face       |
| cancer | Byu4100 | [X]Malignant melanoma of skin, unspecified                  |
| cancer | Byu5.00 | [X]Malignant neoplasm of mesothelial and soft tissue        |
| cancer | Byu5000 | [X]Mesothelioma of other sites                              |
| cancer | Byu5011 | [X]Mesothelioma of lung                                     |
| cancer | Byu5100 | [X]Mesothelioma, unspecified                                |
| cancer | Byu5300 | [X]Kaposi's sarcoma, unspecified                            |
| cancer | Byu5400 | [X]Malign neoplasm/peripheral nerves trunk,unspecified      |
| cancer | Byu5500 | [X]Mal neopl/overlap les/periph nerv+autono nerv syst       |
| cancer | Byu5700 | [X]Malignant neoplasm of peritoneum, unspecified            |
| cancer | Byu5800 | [X]Mal neoplasm/connective+soft tissue of trunk,unspec      |

|        |         |                                                          |
|--------|---------|----------------------------------------------------------|
| cancer | Byu5900 | [X]Malignant neoplasm/connective + soft tissue,unspec    |
| cancer | Byu5B00 | [X]Kaposi's sarcoma of other sites                       |
| cancer | Byu6.00 | [X]Malignant neoplasm of breast                          |
| cancer | Byu7.00 | [X]Malignant neoplasm of female genital organs           |
| cancer | Byu7000 | [X]Malignant neoplasm of uterine adnexa, unspecified     |
| cancer | Byu7100 | [X]Malign neoplasm/other specified female genital organs |
| cancer | Byu7300 | [X]Malignant neoplasm of female genital organ, unspec    |
| cancer | Byu8.00 | [X]Malignant neoplasm of male genital organs             |
| cancer | Byu8000 | [X]Malignant neopl/other specified male genital organs   |
| cancer | Byu8200 | [X]Malignant neoplasm of male genital organ, unspecified |
| cancer | Byu9.00 | [X]Malignant neoplasm of urinary tract                   |
| cancer | Byu9000 | [X]Malignant neoplasm of urinary organ, unspecified      |
| cancer | ByuA.00 | [X]Malignant neoplasm of eye, brain and other parts cent |
| cancer | ByuA000 | [X]Malignant neoplasm/other and unspec cranial nerves    |
| cancer | ByuA100 | [X]Malignant neoplasm/central nervous system, unspec     |
| cancer | ByuA200 | [X]Malignant neoplasm of meninges, unspecified           |
| cancer | ByuA300 | [X]Malig neopl, overlap lesion brain & other part of CNS |
| cancer | ByuB.00 | [X]Malignant neoplasm of thyroid other endocrine glands  |
| cancer | ByuB100 | [X]Malignant neoplasm of endocrine gland, unspecified    |
| cancer | ByuC.00 | [X]Malignant neoplasm of ill-defined, secondary unspeci  |
| cancer | ByuC000 | [X]Malignant neoplasm of other specified sites           |
| cancer | ByuC100 | [X]Malig neoplasm/overlap lesion/other+ill-defined sites |
| cancer | ByuC800 | [X]Malignant neoplasm without specification of site      |
| cancer | ByuD.00 | [X]Malignant neoplasms of lymphoid, haematopoietic rela  |
| cancer | ByuD000 | [X]Other Hodgkin's dis                                   |
| cancer | ByuD100 | [X]Other types of follicular non-Hodgkin's lymphoma      |
| cancer | ByuD200 | [X]Other types of diffuse non-Hodgkin's lymphoma         |
| cancer | ByuD300 | [X]Other specified types of non-Hodgkin's lymphoma       |
| cancer | ByuD400 | [X]Other malignant immunoproliferative diss              |
| cancer | ByuD500 | [X]Other lymphoid leukaemia                              |
| cancer | ByuD600 | [X]Other myeloid leukaemia                               |
| cancer | ByuD700 | [X]Other monocytic leukaemia                             |
| cancer | ByuD800 | [X]Other specified leukaemias                            |
| cancer | ByuD900 | [X]Other leukaemia of unspecified cell type              |
| cancer | ByuDA00 | [X]Oth spcf mal neoplsm/lymphoid,haematopo+rldt tissue   |
| cancer | ByuDB00 | [X]Mal neopl/lymphoid,haematopo+related tissu,unspcf     |
| cancer | ByuDC00 | [X]Diffuse non-Hodgkin's lymphoma, unspecified           |
| cancer | ByuDE00 | [X]Unspecified B-cell non-Hodgkin's lymphoma             |
| cancer | ByuDF00 | [X]Non-Hodgkin's lymphoma, unspecified type              |
| cancer | ByuDF11 | [X]Non-Hodgkin's lymphoma NOS                            |
| cancer | ByuE.00 | [X]Malignant neoplasms/independent (primary) mult sites  |
| cancer | ByuE000 | [X]Malignant neoplasms/independent(primary)mult sites    |
| cancer | ByuF.00 | [X]In situ neoplasms                                     |
| cancer | ByuF100 | [X]Carcinoma in situ of other specified digestive organs |

|                     |         |                                                           |
|---------------------|---------|-----------------------------------------------------------|
| cancer              | ByuF300 | [X]Carcinoma in situ of other parts of respiratory system |
| cancer              | ByuF600 | [X]Melanoma in situ of other sites                        |
| cancer              | ByuFA00 | [X]Carcinoma in situ of other parts of cervix             |
| cancer              | ByuFC00 | [X]Carcinoma in situ of oth+unspecified male genital orga |
| cancer              | ByuFF00 | [X]Melanoma in situ, unspecified                          |
| cancer              | ByuFG00 | [X]Other carcinoma in situ of breast                      |
| cancer              | ByuHD00 | [X]Myelodysplastic synde, unspecified                     |
| cancer              | F373.00 | Polyneuropathy in malignant dis                           |
| cancer              | F381100 | Myasthenic synde due to other malignancy                  |
| cancer              | F396200 | Myopathy due to malignant dis                             |
| cancer              | H51y700 | Malignant pleural effusion                                |
| cancer              | K01w100 | Drash synde                                               |
| cancer              | K01w112 | Wilms' tumour+nephrotic synde+pseudohermaphrodi           |
| cancer              | N330900 | Osteoporosis in multiple myelomatosis                     |
| cerebrovascular dis | 1477    | H/O: cerebrovascular dis                                  |
| cerebrovascular dis | A94y600 | Rupture of syphilitic cerebral aneurysm                   |
| cerebrovascular dis | E030400 | Acute confusional state, of cerebrovascular origin        |
| cerebrovascular dis | E031400 | Subacute confusional state, of cerebrovascular origin     |
| cerebrovascular dis | F11x200 | Cerebral degeneration due to cerebrovascular dis          |
| cerebrovascular dis | F423600 | Amaurosis fugax                                           |
| cerebrovascular dis | F423700 | Retinal transient arterial occlusion NOS                  |
| cerebrovascular dis | F481400 | Other transient visual loss                               |
| cerebrovascular dis | Fyu5500 | [X]Other transnt cerebral ischaemic attacks+related synd  |
| cerebrovascular dis | Fyu5700 | [X]Other vascular synd/brain in cerebrovasculr diss       |
| cerebrovascular dis | G6...00 | Cerebrovascular dis                                       |
| cerebrovascular dis | G60..00 | Subarachnoid haemorrhage                                  |
| cerebrovascular dis | G600.00 | Ruptured berry aneurysm                                   |
| cerebrovascular dis | G601.00 | Subarachnoid haemorrh from carotid siphon bifurcation     |
| cerebrovascular dis | G602.00 | Subarachnoid haemorrhage from middle cerebral artery      |
| cerebrovascular dis | G603.00 | Subarachnoid haemorrh frm ant communicating artery        |
| cerebrovascular dis | G604.00 | Subarachnoid haemorrh from post communicating artery      |
| cerebrovascular dis | G605.00 | Subarachnoid haemorrhage from basilar artery              |
| cerebrovascular dis | G606.00 | Subarachnoid haemorrhage from vertebral artery            |
| cerebrovascular dis | G60X.00 | Subarachnoid haemorrh from intracranial artery, unspecif  |
| cerebrovascular dis | G60z.00 | Subarachnoid haemorrhage NOS                              |
| cerebrovascular dis | G61..00 | Intracerebral haemorrhage                                 |
| cerebrovascular dis | G61..11 | CVA-cerebrovascular accid due to intracerebral haemorrh   |
| cerebrovascular dis | G61..12 | Stroke due to intracerebral haemorrhage                   |
| cerebrovascular dis | G610.00 | Cortical haemorrhage                                      |
| cerebrovascular dis | G611.00 | Internal capsule haemorrhage                              |
| cerebrovascular dis | G612.00 | Basal nucleus haemorrhage                                 |
| cerebrovascular dis | G613.00 | Cerebellar haemorrhage                                    |
| cerebrovascular dis | G614.00 | Pontine haemorrhage                                       |
| cerebrovascular dis | G615.00 | Bulbar haemorrhage                                        |

|                     |         |                                                            |
|---------------------|---------|------------------------------------------------------------|
| cerebrovascular dis | G616.00 | External capsule haemorrhage                               |
| cerebrovascular dis | G617.00 | Intracerebral haemorrhage, intraventricular                |
| cerebrovascular dis | G618.00 | Intracerebral haemorrhage, multiple localized              |
| cerebrovascular dis | G619.00 | Lobar cerebral haemorrhage                                 |
| cerebrovascular dis | G61X.00 | Intracerebral haemorrhage in hemisphere, unspecified       |
| cerebrovascular dis | G61X000 | Left sided intracerebral haemorrhage, unspecified          |
| cerebrovascular dis | G61X100 | Right sided intracerebral haemorrhage, unspecified         |
| cerebrovascular dis | G61z.00 | Intracerebral haemorrhage NOS                              |
| cerebrovascular dis | G62..00 | Other and unspecified intracranial haemorrhage             |
| cerebrovascular dis | G620.00 | Extradural haemorrhage - nontraumatic                      |
| cerebrovascular dis | G621.00 | Subdural haemorrhage - nontraumatic                        |
| cerebrovascular dis | G622.00 | Subdural haematoma - nontraumatic                          |
| cerebrovascular dis | G623.00 | Subdural haemorrhage NOS                                   |
| cerebrovascular dis | G62z.00 | Intracranial haemorrhage NOS                               |
| cerebrovascular dis | G63..00 | Precerebral arterial occlusion                             |
| cerebrovascular dis | G63..11 | Infarction - precerebral                                   |
| cerebrovascular dis | G63..12 | Stenosis of precerebral arteries                           |
| cerebrovascular dis | G630.00 | Basilar artery occlusion                                   |
| cerebrovascular dis | G631.00 | Carotid artery occlusion                                   |
| cerebrovascular dis | G631.11 | Stenosis, carotid artery                                   |
| cerebrovascular dis | G631.12 | Thrombosis, carotid artery                                 |
| cerebrovascular dis | G632.00 | Vertebral artery occlusion                                 |
| cerebrovascular dis | G633.00 | Multiple and bilateral precerebral arterial occlusion      |
| cerebrovascular dis | G634.00 | Carotid artery stenosis                                    |
| cerebrovascular dis | G63y.00 | Other precerebral artery occlusion                         |
| cerebrovascular dis | G63y000 | Cerebral infarct due to thrombosis of precerebral arteries |
| cerebrovascular dis | G63y100 | Cerebral infarction due to embolism precerebral arteries   |
| cerebrovascular dis | G63z.00 | Precerebral artery occlusion NOS                           |
| cerebrovascular dis | G64..00 | Cerebral arterial occlusion                                |
| cerebrovascular dis | G64..11 | CVA - cerebral artery occlusion                            |
| cerebrovascular dis | G64..12 | Infarction - cerebral                                      |
| cerebrovascular dis | G64..13 | Stroke due to cerebral arterial occlusion                  |
| cerebrovascular dis | G640.00 | Cerebral thrombosis                                        |
| cerebrovascular dis | G640000 | Cerebral infarction due to thrombosis of cerebral arteries |
| cerebrovascular dis | G641.00 | Cerebral embolism                                          |
| cerebrovascular dis | G641.11 | Cerebral embolus                                           |
| cerebrovascular dis | G641000 | Cerebral infarction due to embolism of cerebral arteries   |
| cerebrovascular dis | G64z.00 | Cerebral infarction NOS                                    |
| cerebrovascular dis | G64z.11 | Brainstem infarction NOS                                   |
| cerebrovascular dis | G64z.12 | Cerebellar infarction                                      |
| cerebrovascular dis | G64z000 | Brainstem infarction                                       |
| cerebrovascular dis | G64z100 | Wallenberg synde                                           |
| cerebrovascular dis | G64z111 | Lateral medullary synde                                    |
| cerebrovascular dis | G64z200 | Left sided cerebral infarction                             |

|                     |         |                                                    |
|---------------------|---------|----------------------------------------------------|
| cerebrovascular dis | G64z300 | Right sided cerebral infarction                    |
| cerebrovascular dis | G64z400 | Infarction of basal ganglia                        |
| cerebrovascular dis | G65..00 | Transient cerebral ischaemia                       |
| cerebrovascular dis | G65..11 | Drop attack                                        |
| cerebrovascular dis | G65..12 | Transient ischaemic attack                         |
| cerebrovascular dis | G65..13 | Vertebro-basilar insufficiency                     |
| cerebrovascular dis | G650.00 | Basilar artery synde                               |
| cerebrovascular dis | G650.11 | Insufficiency - basilar artery                     |
| cerebrovascular dis | G651.00 | Vertebral artery synde                             |
| cerebrovascular dis | G651000 | Vertebro-basilar artery synde                      |
| cerebrovascular dis | G652.00 | Subclavian steal synde                             |
| cerebrovascular dis | G653.00 | Carotid artery synde hemispheric                   |
| cerebrovascular dis | G654.00 | Multiple and bilateral precerebral artery syndes   |
| cerebrovascular dis | G655.00 | Transient global amnesia                           |
| cerebrovascular dis | G656.00 | Vertebrobasilar insufficiency                      |
| cerebrovascular dis | G657.00 | Carotid territory transient ischaemic attack       |
| cerebrovascular dis | G65y.00 | Other transient cerebral ischaemia                 |
| cerebrovascular dis | G65z.00 | Transient cerebral ischaemia NOS                   |
| cerebrovascular dis | G65z000 | Impending cerebral ischaemia                       |
| cerebrovascular dis | G65z100 | Intermittent cerebral ischaemia                    |
| cerebrovascular dis | G65zz00 | Transient cerebral ischaemia NOS                   |
| cerebrovascular dis | G66..00 | Stroke and cerebrovascular accident unspecified    |
| cerebrovascular dis | G66..11 | CVA unspecified                                    |
| cerebrovascular dis | G66..12 | Stroke unspecified                                 |
| cerebrovascular dis | G66..13 | CVA - Cerebrovascular accident unspecified         |
| cerebrovascular dis | G660.00 | Middle cerebral artery synde                       |
| cerebrovascular dis | G661.00 | Anterior cerebral artery synde                     |
| cerebrovascular dis | G662.00 | Posterior cerebral artery synde                    |
| cerebrovascular dis | G663.00 | Brain stem stroke synde                            |
| cerebrovascular dis | G664.00 | Cerebellar stroke synde                            |
| cerebrovascular dis | G665.00 | Pure motor lacunar synde                           |
| cerebrovascular dis | G666.00 | Pure sensory lacunar synde                         |
| cerebrovascular dis | G667.00 | Left sided CVA                                     |
| cerebrovascular dis | G668.00 | Right sided CVA                                    |
| cerebrovascular dis | G669.00 | Cerebral palsy, not congenital or infantile, acute |
| cerebrovascular dis | G67..00 | Other cerebrovascular dis                          |
| cerebrovascular dis | G670.00 | Cerebral atherosclerosis                           |
| cerebrovascular dis | G670.11 | Precerebral atherosclerosis                        |
| cerebrovascular dis | G671.00 | Generalised ischaemic cerebrovascular dis NOS      |
| cerebrovascular dis | G671000 | Acute cerebrovascular insufficiency NOS            |
| cerebrovascular dis | G671100 | Chronic cerebral ischaemia                         |
| cerebrovascular dis | G671z00 | Generalised ischaemic cerebrovascular dis NOS      |
| cerebrovascular dis | G673.00 | Cerebral aneurysm, nonruptured                     |
| cerebrovascular dis | G673000 | Dissection of cerebral arteries, nonruptured       |

|                     |         |                                                              |
|---------------------|---------|--------------------------------------------------------------|
| cerebrovascular dis | G673100 | Carotico-cavernous sinus fistula                             |
| cerebrovascular dis | G673200 | Carotid artery dissection                                    |
| cerebrovascular dis | G673300 | Vertebral artery dissection                                  |
| cerebrovascular dis | G674.00 | Cerebral arteritis                                           |
| cerebrovascular dis | G674000 | Cerebral amyloid angiopathy                                  |
| cerebrovascular dis | G675.00 | Moyamoya dis                                                 |
| cerebrovascular dis | G676.00 | Nonpyogenic venous sinus thrombosis                          |
| cerebrovascular dis | G676000 | Cereb infarct due cerebral ven thrombosis, nonpyogenic       |
| cerebrovascular dis | G677.00 | Occlusion/stenosis cerebral arts not result cerebral infarct |
| cerebrovascular dis | G677000 | Occlusion and stenosis of middle cerebral artery             |
| cerebrovascular dis | G677100 | Occlusion and stenosis of anterior cerebral artery           |
| cerebrovascular dis | G677200 | Occlusion and stenosis of posterior cerebral artery          |
| cerebrovascular dis | G677300 | Occlusion and stenosis of cerebellar arteries                |
| cerebrovascular dis | G677400 | Occlusion+stenosis of multiple and bilat cerebral arteries   |
| cerebrovascular dis | G678.00 | Cereb autosom dom arteriop subcort infarcts leukoenc         |
| cerebrovascular dis | G679.00 | Small vessel cerebrovascular dis                             |
| cerebrovascular dis | G67A.00 | Cerebral vein thrombosis                                     |
| cerebrovascular dis | G67y.00 | Other cerebrovascular dis OS                                 |
| cerebrovascular dis | G67z.00 | Other cerebrovascular dis NOS                                |
| cerebrovascular dis | G68..00 | Late effects of cerebrovascular dis                          |
| cerebrovascular dis | G680.00 | Sequelae of subarachnoid haemorrhage                         |
| cerebrovascular dis | G681.00 | Sequelae of intracerebral haemorrhage                        |
| cerebrovascular dis | G682.00 | Sequelae of other nontraumatic intracranial haemorrhage      |
| cerebrovascular dis | G683.00 | Sequelae of cerebral infarction                              |
| cerebrovascular dis | G68W.00 | Sequelae/other + unspecified cerebrovascular dis             |
| cerebrovascular dis | G68X.00 | Sequelae of stroke, not specfd as h'morrhage or infarction   |
| cerebrovascular dis | G6W..00 | Cereb infarct due unsp occlus/stenos precerebr arteries      |
| cerebrovascular dis | G6X..00 | Cerebrl infarctn due/unspcf occlusn or sten/cerebrl artr     |
| cerebrovascular dis | G6y..00 | Other specified cerebrovascular dis                          |
| cerebrovascular dis | G6z..00 | Cerebrovascular dis NOS                                      |
| cerebrovascular dis | Gyu6.00 | [X]Cerebrovascular dis                                       |
| cerebrovascular dis | Gyu6000 | [X]Subarachnoid haemorrh fr other intracranial arteries      |
| cerebrovascular dis | Gyu6100 | [X]Other subarachnoid haemorrhage                            |
| cerebrovascular dis | Gyu6200 | [X]Other intracerebral haemorrhage                           |
| cerebrovascular dis | Gyu6300 | [X]Cerebrl infarctn due/unspcf occlusn/sten/cerebrl artr     |
| cerebrovascular dis | Gyu6400 | [X]Other cerebral infarction                                 |
| cerebrovascular dis | Gyu6500 | [X]Occlusion and stenosis of other precerebral arteries      |
| cerebrovascular dis | Gyu6600 | [X]Occlusion and stenosis of other cerebral arteries         |
| cerebrovascular dis | Gyu6A00 | [X]Other cerebrovascular disorders in dis                    |
| cerebrovascular dis | Gyu6E00 | [X]Subarachnoid haemorrh frm intracranial artery, unspc      |
| cerebrovascular dis | Gyu6F00 | [X]Intracerebral haemorrhage in hemisphere, unspecified      |
| cerebrovascular dis | Gyu6G00 | [X]Cereb infarct due unsp occlus/stenos precerebr arter      |
| cerebrovascular dis | L440.00 | Cerebrovascular disorders in the puerperium                  |
| cerebrovascular dis | L440.11 | CVA - cerebrovascular accident in the puerperium             |

|                       |          |                                                         |
|-----------------------|----------|---------------------------------------------------------|
| cerebrovascular dis   | L440.12  | Stroke in the puerperium                                |
| cerebrovascular dis   | L440000  | Puerperal cerebrovascular disorder unspecified          |
| cerebrovascular dis   | L440100  | Puerperal cerebrovascular disorder - delivered          |
| cerebrovascular dis   | L440300  | Puerperal cerebrovascular disorder with antenatal comp  |
| cerebrovascular dis   | R014.00  | [D]Transient paralysis of a limb                        |
| cerebrovascular dis   | R014000  | [D]Transient monoplegia NOS                             |
| cerebrovascular dis   | R014z00  | [D]Transient limb paralysis NOS                         |
| cerebrovascular dis   | ZV12511  | [V]Personal history of stroke                           |
| cerebrovascular dis   | ZV12512  | [V]Personal history of cerebrovascular accident (CVA)   |
| cerebrovascular dis   | ZV12D00  | [V]Personal history of transient ischaemic attack       |
| Chronic pulmonary dis | 173A.00  | Exercise induced asthma                                 |
| Chronic pulmonary dis | 173c.00  | Occupational asthma                                     |
| Chronic pulmonary dis | 173d.00  | Work aggravated asthma                                  |
| Chronic pulmonary dis | 178..00  | Asthma trigger                                          |
| Chronic pulmonary dis | 1780     | Aspirin induced asthma                                  |
| Chronic pulmonary dis | 1781     | Asthma trigger - pollen                                 |
| Chronic pulmonary dis | 1782     | Asthma trigger - tobacco smoke                          |
| Chronic pulmonary dis | 1783     | Asthma trigger - warm air                               |
| Chronic pulmonary dis | 1784     | Asthma trigger - emotion                                |
| Chronic pulmonary dis | 1785     | Asthma trigger - damp                                   |
| Chronic pulmonary dis | 1786     | Asthma trigger - animals                                |
| Chronic pulmonary dis | 1787     | Asthma trigger - seasonal                               |
| Chronic pulmonary dis | 1788     | Asthma trigger - cold air                               |
| Chronic pulmonary dis | 1789     | Asthma trigger - respiratory infection                  |
| Chronic pulmonary dis | 178A.00  | Asthma trigger - airborne dust                          |
| Chronic pulmonary dis | 178B.00  | Asthma trigger - exercise                               |
| Chronic pulmonary dis | 102..00  | Asthma confirmed                                        |
| Chronic pulmonary dis | 663d.00  | Emergency asthma admission since last appointment       |
| Chronic pulmonary dis | 663e.00  | Asthma restricts exercise                               |
| Chronic pulmonary dis | 6.63E+02 | Asthma sometimes restricts exercise                     |
| Chronic pulmonary dis | 663f.00  | Asthma never restricts exercise                         |
| Chronic pulmonary dis | 663h.00  | Asthma - currently dormant                              |
| Chronic pulmonary dis | 663j.00  | Asthma - currently active                               |
| Chronic pulmonary dis | 663m.00  | Asthma accidt and emergency attendance since last visit |
| Chronic pulmonary dis | 663n.00  | Asthma treatment compliance satisfactory                |
| Chronic pulmonary dis | 663N.00  | Asthma disturbing sleep                                 |
| Chronic pulmonary dis | 663N000  | Asthma causing night waking                             |
| Chronic pulmonary dis | 663N100  | Asthma disturbs sleep weekly                            |
| Chronic pulmonary dis | 663N200  | Asthma disturbs sleep frequently                        |
| Chronic pulmonary dis | 663O.00  | Asthma not disturbing sleep                             |
| Chronic pulmonary dis | 663O000  | Asthma never disturbs sleep                             |
| Chronic pulmonary dis | 663p.00  | Asthma treatment compliance unsatisfactory              |
| Chronic pulmonary dis | 663P.00  | Asthma limiting activities                              |
| Chronic pulmonary dis | 663P000  | Asthma limits activities 1 to 2 times per month         |

|                       |         |                                                          |
|-----------------------|---------|----------------------------------------------------------|
| Chronic pulmonary dis | 663P100 | Asthma limits activities 1 to 2 times per week           |
| Chronic pulmonary dis | 663P200 | Asthma limits activities most days                       |
| Chronic pulmonary dis | 663Q.00 | Asthma not limiting activities                           |
| Chronic pulmonary dis | 663q.00 | Asthma daytime symptoms                                  |
| Chronic pulmonary dis | 663r.00 | Asthma causes night symptoms 1 to 2 times per month      |
| Chronic pulmonary dis | 663s.00 | Asthma never causes daytime symptoms                     |
| Chronic pulmonary dis | 663t.00 | Asthma causes daytime symptoms 1 to 2 times per month    |
| Chronic pulmonary dis | 663u.00 | Asthma causes daytime symptoms 1 to 2 times per week     |
| Chronic pulmonary dis | 663U.00 | Asthma management plan given                             |
| Chronic pulmonary dis | 663V.00 | Asthma severity                                          |
| Chronic pulmonary dis | 663v.00 | Asthma causes daytime symptoms most days                 |
| Chronic pulmonary dis | 663V000 | Occasional asthma                                        |
| Chronic pulmonary dis | 663V100 | Mild asthma                                              |
| Chronic pulmonary dis | 663V200 | Moderate asthma                                          |
| Chronic pulmonary dis | 663V300 | Severe asthma                                            |
| Chronic pulmonary dis | 663w.00 | Asthma limits walking up hills or stairs                 |
| Chronic pulmonary dis | 663W.00 | Asthma prophylactic medication used                      |
| Chronic pulmonary dis | 663x.00 | Asthma limits walking on the flat                        |
| Chronic pulmonary dis | 663y.00 | Number of asthma exacerbations in past year              |
| Chronic pulmonary dis | 66Y5.00 | Change in asthma management plan                         |
| Chronic pulmonary dis | 66Y9.00 | Step up change in asthma management plan                 |
| Chronic pulmonary dis | 66YA.00 | Step down change in asthma management plan               |
| Chronic pulmonary dis | 66YC.00 | Absent from work or school due to asthma                 |
| Chronic pulmonary dis | 66YJ.00 | Asthma annual review                                     |
| Chronic pulmonary dis | 66YK.00 | Asthma follow-up                                         |
| Chronic pulmonary dis | 66Yp.00 | Asthma review using Roy Colleg of Physicians three quest |
| Chronic pulmonary dis | 66YP.00 | Asthma night-time symptoms                               |
| Chronic pulmonary dis | 66Yq.00 | Asthma causes night time symptoms 1-2 times per week     |
| Chronic pulmonary dis | 66Yr.00 | Asthma causes symptoms most nights                       |
| Chronic pulmonary dis | 66Ys.00 | Asthma never causes night symptoms                       |
| Chronic pulmonary dis | 8791    | Further asthma - drug prevent.                           |
| Chronic pulmonary dis | 8793    | Asthma control step 0                                    |
| Chronic pulmonary dis | 8794    | Asthma control step 1                                    |
| Chronic pulmonary dis | 8795    | Asthma control step 2                                    |
| Chronic pulmonary dis | 8796    | Asthma control step 3                                    |
| Chronic pulmonary dis | 8797    | Asthma control step 4                                    |
| Chronic pulmonary dis | 8798    | Asthma control step 5                                    |
| Chronic pulmonary dis | 8B3j.00 | Asthma medication review                                 |
| Chronic pulmonary dis | 8CR0.00 | Asthma clinical management plan                          |
| Chronic pulmonary dis | 9N1d.00 | Seen in asthma clinic                                    |
| Chronic pulmonary dis | H061400 | Obliterating fibrous bronchiolitis                       |
| Chronic pulmonary dis | H312300 | Bronchiolitis obliterans                                 |
| Chronic pulmonary dis | H32y100 | Atrophic (senile) emphysema                              |
| Chronic pulmonary dis | H33..00 | Asthma                                                   |



|                       |         |                                             |
|-----------------------|---------|---------------------------------------------|
| Chronic pulmonary dis | H33..11 | Bronchial asthma                            |
| Chronic pulmonary dis | H330.00 | Extrinsic (atopic) asthma                   |
| Chronic pulmonary dis | H330.11 | Allergic asthma                             |
| Chronic pulmonary dis | H330.12 | Childhood asthma                            |
| Chronic pulmonary dis | H330.13 | Hay fever with asthma                       |
| Chronic pulmonary dis | H330.14 | Pollen asthma                               |
| Chronic pulmonary dis | H330000 | Extrinsic asthma without status asthmaticus |
| Chronic pulmonary dis | H330011 | Hay fever with asthma                       |
| Chronic pulmonary dis | H330100 | Extrinsic asthma with status asthmaticus    |
| Chronic pulmonary dis | H330111 | Extrinsic asthma with asthma attack         |
| Chronic pulmonary dis | H330z00 | Extrinsic asthma NOS                        |
| Chronic pulmonary dis | H331.00 | Intrinsic asthma                            |
| Chronic pulmonary dis | H331.11 | Late onset asthma                           |
| Chronic pulmonary dis | H331000 | Intrinsic asthma without status asthmaticus |
| Chronic pulmonary dis | H331100 | Intrinsic asthma with status asthmaticus    |
| Chronic pulmonary dis | H331111 | Intrinsic asthma with asthma attack         |
| Chronic pulmonary dis | H331z00 | Intrinsic asthma NOS                        |
| Chronic pulmonary dis | H332.00 | Mixed asthma                                |
| Chronic pulmonary dis | H334.00 | Brittle asthma                              |
| Chronic pulmonary dis | H33z.00 | Asthma unspecified                          |
| Chronic pulmonary dis | H33z.11 | Hyperreactive airways dis                   |
| Chronic pulmonary dis | H33z000 | Status asthmaticus NOS                      |
| Chronic pulmonary dis | H33z011 | Severe asthma attack                        |
| Chronic pulmonary dis | H33z100 | Asthma attack                               |
| Chronic pulmonary dis | H33z111 | Asthma attack NOS                           |
| Chronic pulmonary dis | H33z200 | Late-onset asthma                           |
| Chronic pulmonary dis | H33zz00 | Asthma NOS                                  |
| Chronic pulmonary dis | H33zz11 | Exercise induced asthma                     |
| Chronic pulmonary dis | H33zz12 | Allergic asthma NEC                         |
| Chronic pulmonary dis | H33zz13 | Allergic bronchitis NEC                     |
| Chronic pulmonary dis | H34..00 | Bronchiectasis                              |
| Chronic pulmonary dis | H340.00 | Recurrent bronchiectasis                    |
| Chronic pulmonary dis | H341.00 | Post-infective bronchiectasis               |
| Chronic pulmonary dis | H34z.00 | Bronchiectasis NOS                          |
| Chronic pulmonary dis | H35y600 | Sequoiosis (red-cedar asthma)               |
| Chronic pulmonary dis | H35y700 | Wood asthma                                 |
| Chronic pulmonary dis | H4...11 | Pneumoconioses                              |
| Chronic pulmonary dis | H4...12 | Occupational lung dis                       |
| Chronic pulmonary dis | H40..00 | Coal workers' pneumoconiosis                |
| Chronic pulmonary dis | H41..00 | Asbestosis                                  |
| Chronic pulmonary dis | H410.00 | Pleural plaque dis due to asbestosis        |
| Chronic pulmonary dis | H410.11 | Asbestos-induced pleural plaque             |
| Chronic pulmonary dis | H41z.00 | Asbestosis NOS                              |
| Chronic pulmonary dis | H42..00 | Silica and silicate pneumoconiosis          |

|                       |         |                                                      |
|-----------------------|---------|------------------------------------------------------|
| Chronic pulmonary dis | H420.00 | Talc pneumoconiosis                                  |
| Chronic pulmonary dis | H421.00 | Simple silicosis                                     |
| Chronic pulmonary dis | H422.00 | Complicated silicosis                                |
| Chronic pulmonary dis | H423.00 | Massive silicotic fibrosis                           |
| Chronic pulmonary dis | H42z.00 | Silica pneumoconiosis NOS                            |
| Chronic pulmonary dis | H43..00 | Pneumoconiosis due to other inorganic dust           |
| Chronic pulmonary dis | H431.00 | Bauxite fibrosis of lung                             |
| Chronic pulmonary dis | H432.00 | Berylliosis                                          |
| Chronic pulmonary dis | H433.00 | Graphite fibrosis of lung                            |
| Chronic pulmonary dis | H434.00 | Siderosis                                            |
| Chronic pulmonary dis | H435.00 | Stannosis                                            |
| Chronic pulmonary dis | H43z.00 | Pneumoconiosis due to inorganic dust NOS             |
| Chronic pulmonary dis | H44..00 | Pneumopathy due to inhalation of other dust          |
| Chronic pulmonary dis | H440.00 | Byssinosis                                           |
| Chronic pulmonary dis | H441.00 | Cannabinosis                                         |
| Chronic pulmonary dis | H44z.00 | Pneumopathy due to inhalation of other dust NOS      |
| Chronic pulmonary dis | H45..00 | Pneumoconiosis NOS                                   |
| Chronic pulmonary dis | H450.00 | Pneumoconiosis associated with tuberculosis          |
| Chronic pulmonary dis | H464.00 | Chronic respiratory conditions due to chemical fumes |
| Chronic pulmonary dis | H464000 | Chronic emphysema due to chemical fumes              |
| Chronic pulmonary dis | H464100 | Obliterative bronchiolitis due to chemical fumes     |
| Chronic pulmonary dis | H464200 | Chronic pulmonary fibrosis due to chemical fumes     |
| Chronic pulmonary dis | H464z00 | Chronic respiratory conditions due to chemical fumes |
| Chronic pulmonary dis | H47y000 | Detergent asthma                                     |
| Chronic pulmonary dis | H4y1.00 | Chronic pulmonary radiation dis                      |
| Chronic pulmonary dis | H4y1000 | Chronic pulmonary fibrosis following radiation       |
| Chronic pulmonary dis | H4y1z00 | Chronic pulmonary radiation dis NOS                  |
| Chronic pulmonary dis | H4y2100 | Chronic drug-induced interstitial lung disorders     |
| Chronic pulmonary dis | H560.00 | Pulmonary alveolar proteinosis                       |
| Chronic pulmonary dis | H561.00 | Idiopathic pulmonary haemosiderosis                  |
| Chronic pulmonary dis | H562.00 | Pulmonary alveolar microlithiasis                    |
| Chronic pulmonary dis | H563.00 | Idiopathic fibrosing alveolitis                      |
| Chronic pulmonary dis | H563.11 | Hamman - Rich synde                                  |
| Chronic pulmonary dis | H563.12 | Cryptogenic fibrosing alveolitis                     |
| Chronic pulmonary dis | H563.13 | Idiopathic pulmonary fibrosis                        |
| Chronic pulmonary dis | H563100 | Diffuse pulmonary fibrosis                           |
| Chronic pulmonary dis | H563200 | Pulmonary fibrosis                                   |
| Chronic pulmonary dis | H563300 | Usual interstitial pneumonitis                       |
| Chronic pulmonary dis | H563z00 | Idiopathic fibrosing alveolitis NOS                  |
| Chronic pulmonary dis | H564.00 | Bronchiolitis obliterans organising pneumonia        |
| Chronic pulmonary dis | H564.11 | Cryptogenic organising pneumonia                     |
| Chronic pulmonary dis | H56y000 | Endogenous lipoid pneumonia                          |
| Chronic pulmonary dis | H581.00 | Interstitial emphysema                               |
| Chronic pulmonary dis | H582.00 | Compensatory emphysema                               |

|                       |         |                                                          |
|-----------------------|---------|----------------------------------------------------------|
| Chronic pulmonary dis | H583200 | Eosinophilic bronchitis                                  |
| Chronic pulmonary dis | H591.00 | Chronic respiratory failure                              |
| Chronic pulmonary dis | H593.00 | Chronic type 2 respiratory failure                       |
| Chronic pulmonary dis | Hyu3.00 | [X]Chronic lower respiratory diss                        |
| Chronic pulmonary dis | Hyu4000 | [X]Pneumoconiosis due to other dust containing silica    |
| Chronic pulmonary dis | Hyu4800 | [X]Chronic+other pulmonary manifestations due radiation  |
| Chronic pulmonary dis | Hyu5000 | [X]Other interstitial pulmonary diss with fibrosis       |
| Cong heart failure    | 1O1..00 | Heart failure confirmed                                  |
| Cong heart failure    | 33BA.00 | Impaired left ventricular function                       |
| Cong heart failure    | 585f.00 | Echocardiogram shows left ventricular systolic dysfunct  |
| Cong heart failure    | 585g.00 | Echocardiogram shows left ventricular diastolic dysfunct |
| Cong heart failure    | 662f.00 | New York Heart Association classification - class I      |
| Cong heart failure    | 662g.00 | New York Heart Association classification - class II     |
| Cong heart failure    | 662h.00 | New York Heart Association classification - class III    |
| Cong heart failure    | 662i.00 | New York Heart Association classification - class IV     |
| Cong heart failure    | 662p.00 | Heart failure 6 month review                             |
| Cong heart failure    | 662T.00 | Cong heart failure monitoring                            |
| Cong heart failure    | 662W.00 | Heart failure annual review                              |
| Cong heart failure    | 8B29.00 | Cardiac failure therapy                                  |
| Cong heart failure    | 8H2S.00 | Admit heart failure emergency                            |
| Cong heart failure    | 8HBE.00 | Heart failure follow-up                                  |
| Cong heart failure    | 9N0k.00 | Seen in heart failure clinic                             |
| Cong heart failure    | 9N2p.00 | Seen by community heart failure nurse                    |
| Cong heart failure    | G41..00 | Chronic pulmonary heart dis                              |
| Cong heart failure    | G41y.00 | Other chronic pulmonary heart dis                        |
| Cong heart failure    | G41yz00 | Other chronic pulmonary heart dis NOS                    |
| Cong heart failure    | G41z.00 | Chronic pulmonary heart dis NOS                          |
| Cong heart failure    | G41z.11 | Chronic cor pulmonale                                    |
| Cong heart failure    | G58..00 | Heart failure                                            |
| Cong heart failure    | G58..11 | Cardiac failure                                          |
| Cong heart failure    | G580.00 | Cong heart failure                                       |
| Cong heart failure    | G580.11 | Cong cardiac failure                                     |
| Cong heart failure    | G580.12 | Right heart failure                                      |
| Cong heart failure    | G580.13 | Right ventricular failure                                |
| Cong heart failure    | G580.14 | Biventricular failure                                    |
| Cong heart failure    | G580000 | Acute Cong heart failure                                 |
| Cong heart failure    | G580100 | Chronic Cong heart failure                               |
| Cong heart failure    | G580200 | Decompensated cardiac failure                            |
| Cong heart failure    | G580300 | Compensated cardiac failure                              |
| Cong heart failure    | G580400 | Cong heart failure due to valvular dis                   |
| Cong heart failure    | G581.00 | Left ventricular failure                                 |
| Cong heart failure    | G581.11 | Asthma - cardiac                                         |
| Cong heart failure    | G581.12 | Pulmonary oedema - acute                                 |
| Cong heart failure    | G581.13 | Impaired left ventricular function                       |

|                        |         |                                                     |
|------------------------|---------|-----------------------------------------------------|
| Cong heart failure     | G581000 | Acute left ventricular failure                      |
| Cong heart failure     | G582.00 | Acute heart failure                                 |
| Cong heart failure     | G583.00 | Heart failure with normal ejection fraction         |
| Cong heart failure     | G583.11 | HFNEF - heart failure with normal ejection fraction |
| Cong heart failure     | G583.12 | Heart failure with preserved ejection fraction      |
| Cong heart failure     | G584.00 | Right ventricular failure                           |
| Cong heart failure     | G58z.00 | Heart failure NOS                                   |
| Cong heart failure     | G58z.11 | Weak heart                                          |
| Cong heart failure     | G58z.12 | Cardiac failure NOS                                 |
| Cong heart failure     | G5yy900 | Left ventricular systolic dysfunction               |
| Cong heart failure     | G5yyA00 | Left ventricular diastolic dysfunction              |
| Cong heart failure     | G5yyB00 | Right ventricular diastolic dysfunction             |
| Cong heart failure     | G5yyC00 | Diastolic dysfunction                               |
| Cong heart failure     | G5yyD00 | Left ventricular cardiac dysfunction                |
| Cong heart failure     | R055100 | [D]Cardiogenic shock                                |
| Cong heart failure     | R055111 | [D]Heart shock                                      |
| Cong heart failure     | R2y1000 | [D]Cardiorespiratory failure                        |
| Connective tiss disord | 14G1.00 | H/O: rheumatoid arthritis                           |
| Connective tiss disord | 43F1.00 | Rheumatoid factor positive                          |
| Connective tiss disord | 66H..00 | Rheumatol. disorder monitoring                      |
| Connective tiss disord | 66H..13 | Rheumatoid arthrit. monitoring                      |
| Connective tiss disord | 66H3.00 | Rheumat.dis.- joints affected                       |
| Connective tiss disord | 66H4.00 | Rheumat. symptom change                             |
| Connective tiss disord | 66H5.00 | Rheumat. drug side effect                           |
| Connective tiss disord | 66H6.00 | Rheumat. treatment change                           |
| Connective tiss disord | 66H6.11 | Rheumat.dis.treatment changed                       |
| Connective tiss disord | 66H7.00 | Rheumat.dis.treatment started                       |
| Connective tiss disord | 66H8.00 | Rheumat.dis.treatment stopped                       |
| Connective tiss disord | 66HB.00 | Rheumatology disorder annual review                 |
| Connective tiss disord | 66HB000 | Rheumatoid arthritis annual review                  |
| Connective tiss disord | 66HC.00 | Rheumatic disorder annual review invitation         |
| Connective tiss disord | 66HZ.00 | Rheumatol.dis. monitoring NOS                       |
| Connective tiss disord | AD5..00 | Sarcoidosis                                         |
| Connective tiss disord | AD50.00 | Sarcoidosis of lung                                 |
| Connective tiss disord | AD51.00 | Sarcoidosis of lymph nodes                          |
| Connective tiss disord | AD52.00 | Sarcoidosis of lung with sarcoidosis of lymph nodes |
| Connective tiss disord | AD53.00 | Sarcoidosis of skin                                 |
| Connective tiss disord | AD53000 | Lupus pernio                                        |
| Connective tiss disord | AD54.00 | Sarcoidosis of inferior turbinates                  |
| Connective tiss disord | AD55.00 | Sarcoid arthropathy                                 |
| Connective tiss disord | C332100 | Cryoglobulinaemic vasculitis                        |
| Connective tiss disord | Cyu0600 | [X]Sarcoidosis of other and combined sites          |
| Connective tiss disord | F013.00 | Meningitis due to sarcoidosis                       |
| Connective tiss disord | F326300 | Multiple cranial nerve palsies in sarcoidosis       |

|                        |         |                                                     |
|------------------------|---------|-----------------------------------------------------|
| Connective tiss disord | F371.00 | Polyneuropathy in collagen vascular dis             |
| Connective tiss disord | F371000 | Polyneuropathy in disseminated lupus erythematosus  |
| Connective tiss disord | F371100 | Polyneuropathy in polyarteritis nodosa              |
| Connective tiss disord | F371200 | Polyneuropathy in rheumatoid arthritis              |
| Connective tiss disord | F371z00 | Polyneuropathy in collagen vascular dis NOS         |
| Connective tiss disord | F374900 | Polyneuropathy in sarcoidosis                       |
| Connective tiss disord | F396100 | Myopathy due to disseminated lupus erythematosus    |
| Connective tiss disord | F396300 | Myopathy due to polyarteritis nodosa                |
| Connective tiss disord | F396400 | Myopathy due to rheumatoid arthritis                |
| Connective tiss disord | F396500 | Myopathy due to sarcoidosis                         |
| Connective tiss disord | F396600 | Myopathy due to scleroderma                         |
| Connective tiss disord | F396700 | Myopathy due to Sjogren's dis                       |
| Connective tiss disord | G558300 | Sarcoid heart dis                                   |
| Connective tiss disord | G5y7.00 | Sarcoid myocarditis                                 |
| Connective tiss disord | G5y8.00 | Rheumatoid myocarditis                              |
| Connective tiss disord | G5yA.00 | Rheumatoid carditis                                 |
| Connective tiss disord | G75..00 | Polyarteritis nodosa and allied conditions          |
| Connective tiss disord | G750.00 | Polyarteritis nodosa                                |
| Connective tiss disord | G750.11 | Necrotising angiitis                                |
| Connective tiss disord | G751.00 | Acute febrile mucocutaneous lymph node synde        |
| Connective tiss disord | G751000 | Kawasaki dis                                        |
| Connective tiss disord | G751z00 | Acute febrile mucocutaneous lymph node synde NOS    |
| Connective tiss disord | G752.00 | Hypersensitivity angiitis                           |
| Connective tiss disord | G752.11 | Hypersensitivity arteritis                          |
| Connective tiss disord | G752000 | Goodpasture's synde                                 |
| Connective tiss disord | G752111 | Antiglomerular basement membrane dis                |
| Connective tiss disord | G752112 | Anti GBM dis - Antiglomerular basement membrane dis |
| Connective tiss disord | G752z00 | Hypersensitivity angiitis NOS                       |
| Connective tiss disord | G754.00 | Wegener's granulomatosis                            |
| Connective tiss disord | G754.11 |                                                     |
| Connective tiss disord | G755.00 | Giant cell arteritis                                |
| Connective tiss disord | G755000 | Cranial arteritis                                   |
| Connective tiss disord | G755100 | Temporal arteritis                                  |
| Connective tiss disord | G755200 | Horton's dis                                        |
| Connective tiss disord | G755z00 | Giant cell arteritis NOS                            |
| Connective tiss disord | G757.00 | Takayasu's dis                                      |
| Connective tiss disord | G757.11 | Aortic arch arteritis                               |
| Connective tiss disord | G757.12 | Pulseless dis                                       |
| Connective tiss disord | G758.00 | Churg-Strauss vasculitis                            |
| Connective tiss disord | G759.00 | Juvenile polyarteritis                              |
| Connective tiss disord | G75A.00 | Microscopic polyangiitis                            |
| Connective tiss disord | G75z.00 | Polyarteritis nodosa and allied conditions NOS      |
| Connective tiss disord | G766.00 | Arteritis unspecified                               |
| Connective tiss disord | G766.11 | Aortitis                                            |

|                        |         |                                                         |
|------------------------|---------|---------------------------------------------------------|
| Connective tiss disord | G76B.00 | Vasculitis                                              |
| Connective tiss disord | H570.00 | Rheumatoid lung                                         |
| Connective tiss disord | H571.00 | Rheumatic pneumonia                                     |
| Connective tiss disord | H572.00 | Lung dis with systemic sclerosis                        |
| Connective tiss disord | H57y100 | Lung dis with polymyositis                              |
| Connective tiss disord | H57y200 | Pulmonary sarcoidosis                                   |
| Connective tiss disord | H57y300 | Lung dis with Sjogren's dis                             |
| Connective tiss disord | H57y400 | Lung dis with systemic lupus erythematosus              |
| Connective tiss disord | J63A.00 | Hepatic granulomas in sarcoidosis                       |
| Connective tiss disord | K01x300 | Nephrotic synde in polyarteritis nodosa                 |
| Connective tiss disord | K01x400 | Nephrotic synde in systemic lupus erythematosus         |
| Connective tiss disord | K01x411 | Lupus nephritis                                         |
| Connective tiss disord | K0H..00 | Acute scleroderma renal crisis                          |
| Connective tiss disord | K0J0.00 | Renal involvement in scleroderma                        |
| Connective tiss disord | N000.00 | Systemic lupus erythematosus                            |
| Connective tiss disord | N000000 | Disseminated lupus erythematosus                        |
| Connective tiss disord | N000100 | Libman-Sacks dis                                        |
| Connective tiss disord | N000200 | Drug-induced systemic lupus erythematosus               |
| Connective tiss disord | N000300 | Systemic lupus erythematosus with organ or sys involv   |
| Connective tiss disord | N000400 | Systemic lupus erythematosus with pericarditis          |
| Connective tiss disord | N000500 | Neonatal lupus erythematosus                            |
| Connective tiss disord | N000600 | Cerebral lupus                                          |
| Connective tiss disord | N000z00 | Systemic lupus erythematosus NOS                        |
| Connective tiss disord | N001.00 | Scleroderma                                             |
| Connective tiss disord | N001.11 | Acrosclerosis                                           |
| Connective tiss disord | N001.12 | Systemic sclerosis                                      |
| Connective tiss disord | N001000 | Progressive systemic sclerosis                          |
| Connective tiss disord | N001100 | CREST synde                                             |
| Connective tiss disord | N002.00 | Sicca (Sjogren's) synde                                 |
| Connective tiss disord | N002.11 | Keratoconjunctivitis sicca                              |
| Connective tiss disord | N004.00 | Polymyositis                                            |
| Connective tiss disord | N005.00 | Adult Still's Dis                                       |
| Connective tiss disord | N04..00 | Rheumatoid arthritis other inflammatory polyarthropathy |
| Connective tiss disord | N040.00 | Rheumatoid arthritis                                    |
| Connective tiss disord | N040000 | Rheumatoid arthritis of cervical spine                  |
| Connective tiss disord | N040100 | Other rheumatoid arthritis of spine                     |
| Connective tiss disord | N040200 | Rheumatoid arthritis of shoulder                        |
| Connective tiss disord | N040300 | Rheumatoid arthritis of sternoclavicular joint          |
| Connective tiss disord | N040400 | Rheumatoid arthritis of acromioclavicular joint         |
| Connective tiss disord | N040500 | Rheumatoid arthritis of elbow                           |
| Connective tiss disord | N040600 | Rheumatoid arthritis of distal radio-ulnar joint        |
| Connective tiss disord | N040700 | Rheumatoid arthritis of wrist                           |
| Connective tiss disord | N040800 | Rheumatoid arthritis of MCP joint                       |
| Connective tiss disord | N040900 | Rheumatoid arthritis of PIP joint of finger             |

|                        |         |                                                           |
|------------------------|---------|-----------------------------------------------------------|
| Connective tiss disord | N040A00 | Rheumatoid arthritis of DIP joint of finger               |
| Connective tiss disord | N040B00 | Rheumatoid arthritis of hip                               |
| Connective tiss disord | N040C00 | Rheumatoid arthritis of sacro-iliac joint                 |
| Connective tiss disord | N040D00 | Rheumatoid arthritis of knee                              |
| Connective tiss disord | N040E00 | Rheumatoid arthritis of tibio-fibular joint               |
| Connective tiss disord | N040F00 | Rheumatoid arthritis of ankle                             |
| Connective tiss disord | N040G00 | Rheumatoid arthritis of subtalar joint                    |
| Connective tiss disord | N040H00 | Rheumatoid arthritis of talonavicular joint               |
| Connective tiss disord | N040J00 | Rheumatoid arthritis of other tarsal joint                |
| Connective tiss disord | N040K00 | Rheumatoid arthritis of 1st MTP joint                     |
| Connective tiss disord | N040L00 | Rheumatoid arthritis of lesser MTP joint                  |
| Connective tiss disord | N040M00 | Rheumatoid arthritis of IP joint of toe                   |
| Connective tiss disord | N040N00 | Rheumatoid vasculitis                                     |
| Connective tiss disord | N040P00 | Seronegative rheumatoid arthritis                         |
| Connective tiss disord | N040Q00 | Rheumatoid bursitis                                       |
| Connective tiss disord | N040R00 | Rheumatoid nodule                                         |
| Connective tiss disord | N040S00 | Rheumatoid arthritis - multiple joint                     |
| Connective tiss disord | N040T00 | Flare of rheumatoid arthritis                             |
| Connective tiss disord | N041.00 | Felty's synde                                             |
| Connective tiss disord | N042.00 | Other rheumatoid arthropathy+visceral/system involv       |
| Connective tiss disord | N042100 | Rheumatoid lung dis                                       |
| Connective tiss disord | N042200 | Rheumatoid nodule                                         |
| Connective tiss disord | N042z00 | Rheumatoid arthropathy + visceral/systemic involvement    |
| Connective tiss disord | N043.00 | Juvenile rheumatoid arthritis - Still's dis               |
| Connective tiss disord | N043000 | Juvenile rheumatoid arthropathy unspecified               |
| Connective tiss disord | N043100 | Acute polyarticular juvenile rheumatoid arthritis         |
| Connective tiss disord | N043200 | Pauciarticular juvenile rheumatoid arthritis              |
| Connective tiss disord | N043300 | Monarticular juvenile rheumatoid arthritis                |
| Connective tiss disord | N043z00 | Juvenile rheumatoid arthritis NOS                         |
| Connective tiss disord | N045500 | Juvenile rheumatoid arthritis                             |
| Connective tiss disord | N047.00 | Seropositive erosive rheumatoid arthritis                 |
| Connective tiss disord | N04X.00 | Seropositive rheumatoid arthritis, unspecified            |
| Connective tiss disord | N04y000 | Rheumatoid lung                                           |
| Connective tiss disord | N04y011 | Caplan's synde                                            |
| Connective tiss disord | N04y012 | Fibrosing alveolitis associated with rheumatoid arthritis |
| Connective tiss disord | N04y200 | Adult-onset Still's dis                                   |
| Connective tiss disord | N20..00 | Polymyalgia rheumatica                                    |
| Connective tiss disord | N20..11 | Polymyalgia                                               |
| Connective tiss disord | N200.00 | Giant cell arteritis with polymyalgia rheumatica          |
| Connective tiss disord | N233200 | Myositis in sarcoidosis                                   |
| Connective tiss disord | Nyu1000 | [X]Rheumatoid arthritis+involvement/other organs or syst  |
| Connective tiss disord | Nyu1100 | [X]Other seropositive rheumatoid arthritis                |
| Connective tiss disord | Nyu1200 | [X]Other specified rheumatoid arthritis                   |
| Connective tiss disord | Nyu1G00 | [X]Seropositive rheumatoid arthritis, unspecified         |

|                        |         |                                                          |
|------------------------|---------|----------------------------------------------------------|
| Connective tiss disord | Nyu4.00 | [X]Systemic Connective tiss disords                      |
| Connective tiss disord | Nyu4100 | [X]Other giant cell arteritis                            |
| Connective tiss disord | Nyu4300 | [X]Other forms of systemic lupus erythematosus           |
| Connective tiss disord | Nyu4500 | [X]Other forms of systemic sclerosis                     |
| Connective tiss disord | Nyu4600 | [X]Other overlap syndes                                  |
| Connective tiss disord | Nyu4700 | [X]Other systemic diss of connective tissue              |
| Connective tiss disord | Nyu4C00 | [X]Systemic disorders/connective tissue in other diss CE |
| Connective tiss disord | Nyu4F00 | [X]Mixed connective tissue dis                           |
| Dementia               | 1461    | H/O: dementia                                            |
| Dementia               | 66h..00 | Dementia monitoring                                      |
| Dementia               | 6AB..00 | Dementia annual review                                   |
| Dementia               | 9Ou..00 | Dementia monitoring administration                       |
| Dementia               | 9Ou1.00 | Dementia monitoring first letter                         |
| Dementia               | 9Ou2.00 | Dementia monitoring second letter                        |
| Dementia               | 9Ou3.00 | Dementia monitoring third letter                         |
| Dementia               | 9Ou4.00 | Dementia monitoring verbal invite                        |
| Dementia               | 9Ou5.00 | Dementia monitoring telephone invite                     |
| Dementia               | A411.00 | Jakob-Creutzfeldt dis                                    |
| Dementia               | E00..11 | Senile dementia                                          |
| Dementia               | E00..12 | Senile/presenile dementia                                |
| Dementia               | E000.00 | Uncomplicated senile dementia                            |
| Dementia               | E001.00 | Presenile dementia                                       |
| Dementia               | E001000 | Uncomplicated presenile dementia                         |
| Dementia               | E001100 | Presenile dementia with delirium                         |
| Dementia               | E001200 | Presenile dementia with paranoia                         |
| Dementia               | E001300 | Presenile dementia with depression                       |
| Dementia               | E001z00 | Presenile dementia NOS                                   |
| Dementia               | E002.00 | Senile dementia with depressive or paranoid features     |
| Dementia               | E002000 | Senile dementia with paranoia                            |
| Dementia               | E002100 | Senile dementia with depression                          |
| Dementia               | E002z00 | Senile dementia with depressive or paranoid features     |
| Dementia               | E003.00 | Senile dementia with delirium                            |
| Dementia               | E004.00 | Arteriosclerotic dementia                                |
| Dementia               | E004.11 | Multi infarct dementia                                   |
| Dementia               | E004000 | Uncomplicated arteriosclerotic dementia                  |
| Dementia               | E004100 | Arteriosclerotic dementia with delirium                  |
| Dementia               | E004200 | Arteriosclerotic dementia with paranoia                  |
| Dementia               | E004300 | Arteriosclerotic dementia with depression                |
| Dementia               | E004z00 | Arteriosclerotic dementia NOS                            |
| Dementia               | E012.00 | Other alcoholic dementia                                 |
| Dementia               | E012.11 | Alcoholic dementia NOS                                   |
| Dementia               | E02y100 | Drug-induced dementia                                    |
| Dementia               | E041.00 | Dementia in conditions EC                                |
| Dementia               | Eu00.00 | [X]Dementia in Alzheimer's dis                           |



|          |         |                                                            |
|----------|---------|------------------------------------------------------------|
| Dementia | Eu00000 | [X]Dementia in Alzheimer's dis with early onset            |
| Dementia | Eu00011 | [X]Presenile dementia,Alzheimer's type                     |
| Dementia | Eu00012 | [X]Primary degen dement, Alzhheim's typ, presenile onset   |
| Dementia | Eu00013 | [X]Alzheimer's dis type 2                                  |
| Dementia | Eu00100 | [X]Dementia in Alzheimer's dis with late onset             |
| Dementia | Eu00111 | [X]Alzheimer's dis type 1                                  |
| Dementia | Eu00112 | [X]Senile dementia,Alzheimer's type                        |
| Dementia | Eu00113 | [X]Primary degen dementia of Alzhheim's type, senile onset |
| Dementia | Eu00200 | [X]Dementia in Alzheimer's dis, atypical or mixed type     |
| Dementia | Eu00z00 | [X]Dementia in Alzheimer's dis, unspecified                |
| Dementia | Eu00z11 | [X]Alzheimer's dementia unspec                             |
| Dementia | Eu01.00 | [X]Vascular dementia                                       |
| Dementia | Eu01.11 | [X]Arteriosclerotic dementia                               |
| Dementia | Eu01000 | [X]Vascular dementia of acute onset                        |
| Dementia | Eu01100 | [X]Multi-infarct dementia                                  |
| Dementia | Eu01111 | [X]Predominantly cortical dementia                         |
| Dementia | Eu01200 | [X]Subcortical vascular dementia                           |
| Dementia | Eu01300 | [X]Mixed cortical and subcortical vascular dementia        |
| Dementia | Eu01y00 | [X]Other vascular dementia                                 |
| Dementia | Eu01z00 | [X]Vascular dementia, unspecified                          |
| Dementia | Eu02.00 | [X]Dementia in other diss classified elsewhere             |
| Dementia | Eu02000 | [X]Dementia in Pick's dis                                  |
| Dementia | Eu02100 | [X]Dementia in Creutzfeldt-Jakob dis                       |
| Dementia | Eu02200 | [X]Dementia in Huntington's dis                            |
| Dementia | Eu02300 | [X]Dementia in Parkinson's dis                             |
| Dementia | Eu02400 | [X]Dementia in human immunodef virus [HIV] dis             |
| Dementia | Eu02500 | [X]Lewy body dementia                                      |
| Dementia | Eu02y00 | [X]Dementia in other specified diss classif elsewhere      |
| Dementia | Eu02z00 | [X] Unspecified dementia                                   |
| Dementia | Eu02z11 | [X] Presenile dementia NOS                                 |
| Dementia | Eu02z13 | [X] Primary degenerative dementia NOS                      |
| Dementia | Eu02z14 | [X] Senile dementia NOS                                    |
| Dementia | Eu02z16 | [X] Senile dementia, depressed or paranoid type            |
| Dementia | Eu04100 | [X]Delirium superimposed on dementia                       |
| Dementia | Eu10711 | [X]Alcoholic dementia NOS                                  |
| Dementia | Eu84311 | [X]Dementia infantalis                                     |
| Dementia | F110.00 | Alzheimer's dis                                            |
| Dementia | F110000 | Alzheimer's dis with early onset                           |
| Dementia | F110100 | Alzheimer's dis with late onset                            |
| Dementia | F111.00 | Pick's dis                                                 |
| Dementia | F112.00 | Senile degeneration of brain                               |
| Dementia | F116.00 | Lewy body dis                                              |
| Dementia | Fyu3000 | [X]Other Alzheimer's dis                                   |
| Dementia | ZS7C500 | Language disorder of dementia                              |

|          |         |                                                           |
|----------|---------|-----------------------------------------------------------|
| Diabetes | 42W2.00 | Hb. A1C 7-10% - borderline                                |
| Diabetes | 42W3.00 | Hb. A1C > 10% - bad control                               |
| Diabetes | 66A4.00 | Diabetic on oral treatment                                |
| Diabetes | 66A5.00 | Diabetic on insulin                                       |
| Diabetes | 66AJ.00 | Diabetic - poor control                                   |
| Diabetes | 66AJ.11 | Unstable diabetes                                         |
| Diabetes | 66AJ100 | Brittle diabetes                                          |
| Diabetes | 66AJz00 | Diabetic - poor control NOS                               |
| Diabetes | 66AV.00 | Diabetic on insulin and oral treatment                    |
| Diabetes | C10..00 | Diabetes mellitus                                         |
| Diabetes | C100.00 | Diabetes mellitus with no mention of complication         |
| Diabetes | C100000 | Diabetes mellitus, juvenile type, no mention of complicat |
| Diabetes | C100011 | Insulin dependent diabetes mellitus                       |
| Diabetes | C100100 | Diabetes mellitus, adult onset, no mention of complicat   |
| Diabetes | C100111 | Maturity onset diabetes                                   |
| Diabetes | C100112 | Non-insulin dependent diabetes mellitus                   |
| Diabetes | C100z00 | Diabetes mellitus NOS with no mention of complication     |
| Diabetes | C101.00 | Diabetes mellitus with ketoacidosis                       |
| Diabetes | C101000 | Diabetes mellitus, juvenile type, with ketoacidosis       |
| Diabetes | C101100 | Diabetes mellitus, adult onset, with ketoacidosis         |
| Diabetes | C101y00 | Other specified diabetes mellitus with ketoacidosis       |
| Diabetes | C101z00 | Diabetes mellitus NOS with ketoacidosis                   |
| Diabetes | C102.00 | Diabetes mellitus with hyperosmolar coma                  |
| Diabetes | C102000 | Diabetes mellitus, juvenile type, with hyperosmolar coma  |
| Diabetes | C102100 | Diabetes mellitus, adult onset, with hyperosmolar coma    |
| Diabetes | C102z00 | Diabetes mellitus NOS with hyperosmolar coma              |
| Diabetes | C103.00 | Diabetes mellitus with ketoacidotic coma                  |
| Diabetes | C103000 | Diabetes mellitus, juvenile type, with ketoacidotic coma  |
| Diabetes | C103100 | Diabetes mellitus, adult onset, with ketoacidotic coma    |
| Diabetes | C103y00 | Other specified diabetes mellitus with coma               |
| Diabetes | C103z00 | Diabetes mellitus NOS with ketoacidotic coma              |
| Diabetes | C108.00 | Insulin dependent diabetes mellitus                       |
| Diabetes | C108.11 | IDDM-Insulin dependent diabetes mellitus                  |
| Diabetes | C108.12 | Type 1 diabetes mellitus                                  |
| Diabetes | C108.13 | Type I diabetes mellitus                                  |
| Diabetes | C108400 | Unstable insulin dependent diabetes mellitus              |
| Diabetes | C108411 | Unstable type I diabetes mellitus                         |
| Diabetes | C108412 | Unstable type 1 diabetes mellitus                         |
| Diabetes | C108800 | Insulin dependent diabetes mellitus - poor control        |
| Diabetes | C108811 | Type I diabetes mellitus - poor control                   |
| Diabetes | C108812 | Type 1 diabetes mellitus - poor control                   |
| Diabetes | C108900 | Insulin dependent diabetes maturity onset                 |
| Diabetes | C108911 | Type I diabetes mellitus maturity onset                   |
| Diabetes | C108912 | Type 1 diabetes mellitus maturity onset                   |

|          |         |                                                           |
|----------|---------|-----------------------------------------------------------|
| Diabetes | C108A00 | Insulin-dependent diabetes without complication           |
| Diabetes | C108A11 | Type I diabetes mellitus without complication             |
| Diabetes | C108E00 | Insulin depend diabetes mell with hypoglycaemic coma      |
| Diabetes | C108E11 | Type I diabetes mellitus with hypoglycaemic coma          |
| Diabetes | C108E12 | Type 1 diabetes mellitus with hypoglycaemic coma          |
| Diabetes | C109.00 | Non-insulin dependent diabetes mellitus                   |
| Diabetes | C109.11 | NIDDM - Non-insulin dependent diabetes mellitus           |
| Diabetes | C109.12 | Type 2 diabetes mellitus                                  |
| Diabetes | C109.13 | Type II diabetes mellitus                                 |
| Diabetes | C109700 | Non-insulin dependent diabetes mellitus - poor control    |
| Diabetes | C109711 | Type II diabetes mellitus - poor control                  |
| Diabetes | C109712 | Type 2 diabetes mellitus - poor control                   |
| Diabetes | C109900 | Non-insulin-dependent diabetes mell without complicat     |
| Diabetes | C109911 | Type II diabetes mellitus without complication            |
| Diabetes | C109912 | Type 2 diabetes mellitus without complication             |
| Diabetes | C109D00 | Noninsulin dependent diabetes mell with hypoglyca coma    |
| Diabetes | C109D11 | Type II diabetes mellitus with hypoglycaemic coma         |
| Diabetes | C109D12 | Type 2 diabetes mellitus with hypoglycaemic coma          |
| Diabetes | C109J00 | Insulin treated Type 2 diabetes mellitus                  |
| Diabetes | C109J11 | Insulin treated non-insulin dependent diabetes mellitus   |
| Diabetes | C109J12 | Insulin treated Type II diabetes mellitus                 |
| Diabetes | C109K00 | Hyperosmolar nonketotic state in type 2 diabetes mellitus |
| Diabetes | C10A.00 | Malnutrition-related diabetes mellitus                    |
| Diabetes | C10A000 | Malnutrition-related diabetes mellitus with coma          |
| Diabetes | C10A100 | Malnutrition-related diabetes mellitus with ketoacidosis  |
| Diabetes | C10B.00 | Diabetes mellitus induced by steroids                     |
| Diabetes | C10B000 | Steroid induced diabetes mellitus without complication    |
| Diabetes | C10C.00 | Diabetes mellitus autosomal dominant                      |
| Diabetes | C10C.11 | Maturity onset diabetes in youth                          |
| Diabetes | C10C.12 | Maturity onset diabetes in youth type 1                   |
| Diabetes | C10D.00 | Diabetes mellitus autosomal dominant type 2               |
| Diabetes | C10D.11 | Maturity onset diabetes in youth type 2                   |
| Diabetes | C10E.00 | Type 1 diabetes mellitus                                  |
| Diabetes | C10E.11 | Type I diabetes mellitus                                  |
| Diabetes | C10E.12 | Insulin dependent diabetes mellitus                       |
| Diabetes | C10E400 | Unstable type 1 diabetes mellitus                         |
| Diabetes | C10E411 | Unstable type I diabetes mellitus                         |
| Diabetes | C10E412 | Unstable insulin dependent diabetes mellitus              |
| Diabetes | C10E800 | Type 1 diabetes mellitus - poor control                   |
| Diabetes | C10E811 | Type I diabetes mellitus - poor control                   |
| Diabetes | C10E812 | Insulin dependent diabetes mellitus - poor control        |
| Diabetes | C10E900 | Type 1 diabetes mellitus maturity onset                   |
| Diabetes | C10E911 | Type I diabetes mellitus maturity onset                   |
| Diabetes | C10E912 | Insulin dependent diabetes maturity onset                 |

|          |         |                                                            |
|----------|---------|------------------------------------------------------------|
| Diabetes | C10EA00 | Type 1 diabetes mellitus without complication              |
| Diabetes | C10EA11 | Type I diabetes mellitus without complication              |
| Diabetes | C10EA12 | Insulin-dependent diabetes without complication            |
| Diabetes | C10EE00 | Type 1 diabetes mellitus with hypoglycaemic coma           |
| Diabetes | C10EE12 | Insulin depend diabetes mell with hypoglycaemic coma       |
| Diabetes | C10EM00 | Type 1 diabetes mellitus with ketoacidosis                 |
| Diabetes | C10EM11 | Type I diabetes mellitus with ketoacidosis                 |
| Diabetes | C10EN00 | Type 1 diabetes mellitus with ketoacidotic coma            |
| Diabetes | C10EN11 | Type I diabetes mellitus with ketoacidotic coma            |
| Diabetes | C10ER00 | Latent autoimmune diabetes mellitus in adult               |
| Diabetes | C10F.00 | Type 2 diabetes mellitus                                   |
| Diabetes | C10F.11 | Type II diabetes mellitus                                  |
| Diabetes | C10F700 | Type 2 diabetes mellitus - poor control                    |
| Diabetes | C10F711 | Type II diabetes mellitus - poor control                   |
| Diabetes | C10F900 | Type 2 diabetes mellitus without complication              |
| Diabetes | C10F911 | Type II diabetes mellitus without complication             |
| Diabetes | C10FD00 | Type 2 diabetes mellitus with hypoglycaemic coma           |
| Diabetes | C10FD11 | Type II diabetes mellitus with hypoglycaemic coma          |
| Diabetes | C10FJ00 | Insulin treated Type 2 diabetes mellitus                   |
| Diabetes | C10FJ11 | Insulin treated Type II diabetes mellitus                  |
| Diabetes | C10FK00 | Hyperosmolar non-ketotic state in type 2 diabetes melli    |
| Diabetes | C10FK11 | Hyperosmolar non-ketotic state in type II diabetes melli   |
| Diabetes | C10FN00 | Type 2 diabetes mellitus with ketoacidosis                 |
| Diabetes | C10FN11 | Type II diabetes mellitus with ketoacidosis                |
| Diabetes | C10FP00 | Type 2 diabetes mellitus with ketoacidotic coma            |
| Diabetes | C10FP11 | Type II diabetes mellitus with ketoacidotic coma           |
| Diabetes | C10FS00 | Maternally inherited diabetes mellitus                     |
| Diabetes | C10G.00 | Secondary pancreatic diabetes mellitus                     |
| Diabetes | C10G000 | Secondary pancreatic diabetes mellitus without complic     |
| Diabetes | C10H.00 | Diabetes mellitus induced by non-steroid drugs             |
| Diabetes | C10H000 | DM induced by non-steroid drugs without complication       |
| Diabetes | C10M.00 | Lipoatrophic diabetes mellitus                             |
| Diabetes | C10N.00 | Secondary diabetes mellitus                                |
| Diabetes | C10N000 | Secondary diabetes mellitus without complication           |
| Diabetes | C10N100 | Cystic fibrosis related diabetes mellitus                  |
| Diabetes | C10y.00 | Diabetes mellitus with other specified manifestation       |
| Diabetes | C10y100 | Diabetes mellitus, adult, + other specified manifestation  |
| Diabetes | C10yy00 | Other specified diabetes mellitus with other spec comps    |
| Diabetes | C10yz00 | Diabetes mellitus NOS with other specified manifestation   |
| Diabetes | C10z.00 | Diabetes mellitus with unspecified complication            |
| Diabetes | C10z000 | Diabetes mellitus, juvenile type, + unspecified complic    |
| Diabetes | C10z100 | Diabetes mellitus, adult onset, + unspecified complication |
| Diabetes | C10zy00 | Other specified diabetes mellitus with unspecified comps   |
| Diabetes | C10zz00 | Diabetes mellitus NOS with unspecified complication        |

|                       |         |                                                            |
|-----------------------|---------|------------------------------------------------------------|
| Diabetes              | C11y000 | Steroid induced diabetes                                   |
| Diabetes              | C314.00 | Renal glycosuria                                           |
| Diabetes              | C314.11 | Renal diabetes                                             |
| Diabetes              | Cyu2.00 | [X]Diabetes mellitus                                       |
| Diabetes              | Cyu2000 | [X]Other specified diabetes mellitus                       |
| Diabetes              | F420700 | High risk proliferative diabetic retinopathy               |
| Diabetes              | F420800 | High risk non proliferative diabetic retinopathy           |
| Diabetes              | L180500 | Pre-existing diabetes mellitus, insulin-dependent          |
| Diabetes              | L180600 | Pre-existing diabetes mellitus, non-insulin-dependent      |
| Diabetes              | L180700 | Pre-existing malnutrition-related diabetes mellitus        |
| Diabetes              | L180X00 | Pre-existing diabetes mellitus, unspecified                |
| Diabetes              | PKyP.00 | Diab insipidus,diab mell,optic atrophy and deafness        |
| Diabetes              | PKyP.11 | Wolfram synde                                              |
| Diabetes with complic | 2BBF.00 | Retinal abnormality - diabetes related                     |
| Diabetes with complic | 2BBk.00 | O/E - right eye stable treated prolif diabetic retinopathy |
| Diabetes with complic | 2BBl.00 | O/E - left eye stable treated prolif diabetic retinopathy  |
| Diabetes with complic | 2BBL.00 | O/E - diabetic maculopathy present both eyes               |
| Diabetes with complic | 2BBo.00 | O/E - sight threatening diabetic retinopathy               |
| Diabetes with complic | 2BBP.00 | O/E - right eye background diabetic retinopathy            |
| Diabetes with complic | 2BBQ.00 | O/E - left eye background diabetic retinopathy             |
| Diabetes with complic | 2BBr.00 | Impaired vision due to diabetic retinopathy                |
| Diabetes with complic | 2BBR.00 | O/E - right eye preproliferative diabetic retinopathy      |
| Diabetes with complic | 2BBS.00 | O/E - left eye preproliferative diabetic retinopathy       |
| Diabetes with complic | 2BBT.00 | O/E - right eye proliferative diabetic retinopathy         |
| Diabetes with complic | 2BBV.00 | O/E - left eye proliferative diabetic retinopathy          |
| Diabetes with complic | 2BBW.00 | O/E - right eye diabetic maculopathy                       |
| Diabetes with complic | 2BBX.00 | O/E - left eye diabetic maculopathy                        |
| Diabetes with complic | 2G51000 | Foot abnormality - diabetes related                        |
| Diabetes with complic | 2G5C.00 | Foot abnormality - diabetes related                        |
| Diabetes with complic | 2G5H.00 | O/E - Right diabetic foot - ulcerated                      |
| Diabetes with complic | 2G5L.00 | O/E - Left diabetic foot - ulcerated                       |
| Diabetes with complic | 2G5V.00 | O/E - right chronic diabetic foot ulcer                    |
| Diabetes with complic | 2G5W.00 | O/E - left chronic diabetic foot ulcer                     |
| Diabetes with complic | C104.00 | Diabetes mellitus with renal manifestation                 |
| Diabetes with complic | C104.11 | Diabetic nephropathy                                       |
| Diabetes with complic | C104000 | Diabetes mellitus, juvenile type, with renal manifestation |
| Diabetes with complic | C104100 | Diabetes mellitus, adult onset, with renal manifestation   |
| Diabetes with complic | C104y00 | Other specified diabetes mellitus with renal complic       |
| Diabetes with complic | C104z00 | Diabetes mellitus with nephropathy NOS                     |
| Diabetes with complic | C105.00 | Diabetes mellitus with ophthalmic manifestation            |
| Diabetes with complic | C105000 | Diabetes mell, juvenile type+ophthalmic manifestation      |
| Diabetes with complic | C105100 | Diabetes mellitus, adult onset+ophthalmic manifestation    |
| Diabetes with complic | C105y00 | Other specified diabetes mellitus with ophthalmic complic  |
| Diabetes with complic | C105z00 | Diabetes mellitus NOS with ophthalmic manifestation        |

|                       |         |                                                             |
|-----------------------|---------|-------------------------------------------------------------|
| Diabetes with complic | C106.00 | Diabetes mellitus with neurological manifestation           |
| Diabetes with complic | C106.11 | Diabetic amyotrophy                                         |
| Diabetes with complic | C106.12 | Diabetes mellitus with neuropathy                           |
| Diabetes with complic | C106.13 | Diabetes mellitus with polyneuropathy                       |
| Diabetes with complic | C106000 | Diabetes mellitus, juvenile, + neurological manifestation   |
| Diabetes with complic | C106100 | Diabetes mellitus, adult onset+neurological manifestation   |
| Diabetes with complic | C106y00 | Other specified diabetes mellitus with neurological comps   |
| Diabetes with complic | C106z00 | Diabetes mellitus NOS with neurological manifestation       |
| Diabetes with complic | C107.00 | Diabetes mellitus with peripheral circulatory disorder      |
| Diabetes with complic | C107.11 | Diabetes mellitus with gangrene                             |
| Diabetes with complic | C107.12 | Diabetes with gangrene                                      |
| Diabetes with complic | C107000 | Diabetes mell, juvenile +peripheral circulatory disorder    |
| Diabetes with complic | C107100 | Diabetes mellitus, adult, + peripheral circulatory disorder |
| Diabetes with complic | C107200 | Diabetes mellitus, adult with gangrene                      |
| Diabetes with complic | C107300 | IDDM with peripheral circulatory disorder                   |
| Diabetes with complic | C107400 | NIDDM with peripheral circulatory disorder                  |
| Diabetes with complic | C107z00 | Diabetes mellitus NOS with peripheral circulatory disorder  |
| Diabetes with complic | C108000 | Insulin-dependent diabetes mellitus with renal complic      |
| Diabetes with complic | C108011 | Type I diabetes mellitus with renal complic                 |
| Diabetes with complic | C108012 | Type 1 diabetes mellitus with renal complic                 |
| Diabetes with complic | C108100 | Insulin-dependent diabetes mell with ophthalmic comps       |
| Diabetes with complic | C108112 | Type 1 diabetes mellitus with ophthalmic complic            |
| Diabetes with complic | C108200 | Insulin-dependent diabetes mell with neurological comps     |
| Diabetes with complic | C108211 | Type I diabetes mellitus with neurological complic          |
| Diabetes with complic | C108212 | Type 1 diabetes mellitus with neurological complic          |
| Diabetes with complic | C108300 | Insulin dependent diabetes mellitus with multiple compl     |
| Diabetes with complic | C108311 | Type I diabetes mellitus with multiple complic              |
| Diabetes with complic | C108500 | Insulin dependent diabetes mellitus with ulcer              |
| Diabetes with complic | C108511 | Type I diabetes mellitus with ulcer                         |
| Diabetes with complic | C108512 | Type 1 diabetes mellitus with ulcer                         |
| Diabetes with complic | C108600 | Insulin dependent diabetes mellitus with gangrene           |
| Diabetes with complic | C108700 | Insulin dependent diabetes mellitus with retinopathy        |
| Diabetes with complic | C108711 | Type I diabetes mellitus with retinopathy                   |
| Diabetes with complic | C108712 | Type 1 diabetes mellitus with retinopathy                   |
| Diabetes with complic | C108B00 | Insulin dependent diabetes mell with mononeuropathy         |
| Diabetes with complic | C108B11 | Type I diabetes mellitus with mononeuropathy                |
| Diabetes with complic | C108C00 | Insulin dependent diabetes mellitus with polyneuropathy     |
| Diabetes with complic | C108D00 | Insulin dependent diabetes mellitus with nephropathy        |
| Diabetes with complic | C108D11 | Type I diabetes mellitus with nephropathy                   |
| Diabetes with complic | C108F00 | Insulin dependent diabetes mellitus with diabetic cataract  |
| Diabetes with complic | C108F11 | Type I diabetes mellitus with diabetic cataract             |
| Diabetes with complic | C108G00 | Insulin dependent diab mell with peripheral angiopathy      |
| Diabetes with complic | C108H00 | Insulin dependent diabetes mellitus with arthropathy        |
| Diabetes with complic | C108H11 | Type I diabetes mellitus with arthropathy                   |

|                       |         |                                                          |
|-----------------------|---------|----------------------------------------------------------|
| Diabetes with complic | C108J00 | Insulin dependent diab mell with neuropathic arthropathy |
| Diabetes with complic | C108J11 | Type I diabetes mellitus with neuropathic arthropathy    |
| Diabetes with complic | C108J12 | Type 1 diabetes mellitus with neuropathic arthropathy    |
| Diabetes with complic | C108y00 | Other specified diabetes mellitus with multiple comps    |
| Diabetes with complic | C108z00 | Unspecified diabetes mellitus with multiple complic      |
| Diabetes with complic | C109000 | Noninsulin-dependent diabetes mellitus with renal comps  |
| Diabetes with complic | C109011 | Type II diabetes mellitus with renal complic             |
| Diabetes with complic | C109012 | Type 2 diabetes mellitus with renal complic              |
| Diabetes with complic | C109100 | Noninsulin-dependent diabetes mell with ophthalm comp    |
| Diabetes with complic | C109111 | Type II diabetes mellitus with ophthalmic complic        |
| Diabetes with complic | C109112 | Type 2 diabetes mellitus with ophthalmic complic         |
| Diabetes with complic | C109200 | Noninsulin-dependent diabetes mell with neuro comps      |
| Diabetes with complic | C109211 | Type II diabetes mellitus with neurological complic      |
| Diabetes with complic | C109212 | Type 2 diabetes mellitus with neurological complic       |
| Diabetes with complic | C109300 | Noninsulin-dependent diabetes mell with multiple comps   |
| Diabetes with complic | C109312 | Type 2 diabetes mellitus with multiple complic           |
| Diabetes with complic | C109400 | Non-insulin dependent diabetes mellitus with ulcer       |
| Diabetes with complic | C109411 | Type II diabetes mellitus with ulcer                     |
| Diabetes with complic | C109412 | Type 2 diabetes mellitus with ulcer                      |
| Diabetes with complic | C109500 | Non-insulin dependent diabetes mellitus with gangrene    |
| Diabetes with complic | C109511 | Type II diabetes mellitus with gangrene                  |
| Diabetes with complic | C109512 | Type 2 diabetes mellitus with gangrene                   |
| Diabetes with complic | C109600 | Non-insulin-dependent diabetes mellitus with retinopathy |
| Diabetes with complic | C109611 | Type II diabetes mellitus with retinopathy               |
| Diabetes with complic | C109612 | Type 2 diabetes mellitus with retinopathy                |
| Diabetes with complic | C109A00 | Noninsulin dependt diabetes mell with mononeuropathy     |
| Diabetes with complic | C109A11 | Type II diabetes mellitus with mononeuropathy            |
| Diabetes with complic | C109B00 | Noninsulin dependent diabetes mell with polyneuropathy   |
| Diabetes with complic | C109B11 | Type II diabetes mellitus with polyneuropathy            |
| Diabetes with complic | C109C00 | Non-insulin dependent diabetes mell with nephropathy     |
| Diabetes with complic | C109C11 | Type II diabetes mellitus with nephropathy               |
| Diabetes with complic | C109C12 | Type 2 diabetes mellitus with nephropathy                |
| Diabetes with complic | C109E00 | Non-insulin depend diabetes mell with diabetic cataract  |
| Diabetes with complic | C109E11 | Type II diabetes mellitus with diabetic cataract         |
| Diabetes with complic | C109E12 | Type 2 diabetes mellitus with diabetic cataract          |
| Diabetes with complic | C109F00 | Non-insulin-dependent d m with peripheral angiopath      |
| Diabetes with complic | C109F11 | Type II diabetes mellitus with peripheral angiopathy     |
| Diabetes with complic | C109F12 | Type 2 diabetes mellitus with peripheral angiopathy      |
| Diabetes with complic | C109G00 | Non-insulin dependent diabetes mellitus with arthropathy |
| Diabetes with complic | C109G11 | Type II diabetes mellitus with arthropathy               |
| Diabetes with complic | C109G12 | Type 2 diabetes mellitus with arthropathy                |
| Diabetes with complic | C109H00 | Non-insulin dependent d m with neuropathic arthropathy   |
| Diabetes with complic | C109H11 | Type II diabetes mellitus with neuropathic arthropathy   |
| Diabetes with complic | C109H12 | Type 2 diabetes mellitus with neuropathic arthropathy    |

|                       |         |                                                            |
|-----------------------|---------|------------------------------------------------------------|
| Diabetes with complic | C10A500 | Malnutritn-relat diabetes mell wth periph circul complctn  |
| Diabetes with complic | C10E000 | Type 1 diabetes mellitus with renal complic                |
| Diabetes with complic | C10E012 | Insulin-dependent diabetes mellitus with renal complic     |
| Diabetes with complic | C10E100 | Type 1 diabetes mellitus with ophthalmic complic           |
| Diabetes with complic | C10E111 | Type I diabetes mellitus with ophthalmic complic           |
| Diabetes with complic | C10E112 | Insulindependent diabetes mell with ophthalmic comps       |
| Diabetes with complic | C10E200 | Type 1 diabetes mellitus with neurological complic         |
| Diabetes with complic | C10E212 | Insulindependent diabetes mell with neurological comps     |
| Diabetes with complic | C10E300 | Type 1 diabetes mellitus with multiple complic             |
| Diabetes with complic | C10E311 | Type I diabetes mellitus with multiple complic             |
| Diabetes with complic | C10E312 | Insulin dependent diabetes mell with multiple complicat    |
| Diabetes with complic | C10E500 | Type 1 diabetes mellitus with ulcer                        |
| Diabetes with complic | C10E511 | Type I diabetes mellitus with ulcer                        |
| Diabetes with complic | C10E512 | Insulin dependent diabetes mellitus with ulcer             |
| Diabetes with complic | C10E600 | Type 1 diabetes mellitus with gangrene                     |
| Diabetes with complic | C10E611 | Type I diabetes mellitus with gangrene                     |
| Diabetes with complic | C10E612 | Insulin dependent diabetes mellitus with gangrene          |
| Diabetes with complic | C10E700 | Type 1 diabetes mellitus with retinopathy                  |
| Diabetes with complic | C10E711 | Type I diabetes mellitus with retinopathy                  |
| Diabetes with complic | C10E712 | Insulin dependent diabetes mellitus with retinopathy       |
| Diabetes with complic | C10EB00 | Type 1 diabetes mellitus with mononeuropathy               |
| Diabetes with complic | C10EC00 | Type 1 diabetes mellitus with polyneuropathy               |
| Diabetes with complic | C10EC11 | Type I diabetes mellitus with polyneuropathy               |
| Diabetes with complic | C10EC12 | Insulin dependent diabetes mellitus with polyneuropathy    |
| Diabetes with complic | C10ED00 | Type 1 diabetes mellitus with nephropathy                  |
| Diabetes with complic | C10ED12 | Insulin dependent diabetes mellitus with nephropathy       |
| Diabetes with complic | C10EF00 | Type 1 diabetes mellitus with diabetic cataract            |
| Diabetes with complic | C10EF12 | Insulin dependent diabetes mellitus with diabetic cataract |
| Diabetes with complic | C10EG00 | Type 1 diabetes mellitus with peripheral angiopathy        |
| Diabetes with complic | C10EH00 | Type 1 diabetes mellitus with arthropathy                  |
| Diabetes with complic | C10EJ00 | Type 1 diabetes mellitus with neuropathic arthropathy      |
| Diabetes with complic | C10EK00 | Type 1 diabetes mellitus with persistent proteinuria       |
| Diabetes with complic | C10EL00 | Type 1 diabetes mellitus with persistent microalbuminuria  |
| Diabetes with complic | C10EL11 | Type I diabetes mellitus with persistent microalbuminuria  |
| Diabetes with complic | C10EP00 | Type 1 diabetes mellitus with exudative maculopathy        |
| Diabetes with complic | C10EP11 | Type I diabetes mellitus with exudative maculopathy        |
| Diabetes with complic | C10EQ00 | Type 1 diabetes mellitus with gastroparesis                |
| Diabetes with complic | C10EQ11 | Type I diabetes mellitus with gastroparesis                |
| Diabetes with complic | C10F000 | Type 2 diabetes mellitus with renal complic                |
| Diabetes with complic | C10F011 | Type II diabetes mellitus with renal complic               |
| Diabetes with complic | C10F100 | Type 2 diabetes mellitus with ophthalmic complic           |
| Diabetes with complic | C10F111 | Type II diabetes mellitus with ophthalmic complic          |
| Diabetes with complic | C10F200 | Type 2 diabetes mellitus with neurological complic         |
| Diabetes with complic | C10F211 | Type II diabetes mellitus with neurological complic        |



|                       |         |                                                            |
|-----------------------|---------|------------------------------------------------------------|
| Diabetes with complic | C10F300 | Type 2 diabetes mellitus with multiple complic             |
| Diabetes with complic | C10F311 | Type II diabetes mellitus with multiple complic            |
| Diabetes with complic | C10F400 | Type 2 diabetes mellitus with ulcer                        |
| Diabetes with complic | C10F411 | Type II diabetes mellitus with ulcer                       |
| Diabetes with complic | C10F500 | Type 2 diabetes mellitus with gangrene                     |
| Diabetes with complic | C10F511 | Type II diabetes mellitus with gangrene                    |
| Diabetes with complic | C10F600 | Type 2 diabetes mellitus with retinopathy                  |
| Diabetes with complic | C10F611 | Type II diabetes mellitus with retinopathy                 |
| Diabetes with complic | C10FA00 | Type 2 diabetes mellitus with mononeuropathy               |
| Diabetes with complic | C10FA11 | Type II diabetes mellitus with mononeuropathy              |
| Diabetes with complic | C10FB00 | Type 2 diabetes mellitus with polyneuropathy               |
| Diabetes with complic | C10FB11 | Type II diabetes mellitus with polyneuropathy              |
| Diabetes with complic | C10FC00 | Type 2 diabetes mellitus with nephropathy                  |
| Diabetes with complic | C10FC11 | Type II diabetes mellitus with nephropathy                 |
| Diabetes with complic | C10FE00 | Type 2 diabetes mellitus with diabetic cataract            |
| Diabetes with complic | C10FE11 | Type II diabetes mellitus with diabetic cataract           |
| Diabetes with complic | C10FF00 | Type 2 diabetes mellitus with peripheral angiopathy        |
| Diabetes with complic | C10FF11 | Type II diabetes mellitus with peripheral angiopathy       |
| Diabetes with complic | C10FG00 | Type 2 diabetes mellitus with arthropathy                  |
| Diabetes with complic | C10FG11 | Type II diabetes mellitus with arthropathy                 |
| Diabetes with complic | C10FH00 | Type 2 diabetes mellitus with neuropathic arthropathy      |
| Diabetes with complic | C10FH11 | Type II diabetes mellitus with neuropathic arthropathy     |
| Diabetes with complic | C10FL00 | Type 2 diabetes mellitus with persistent proteinuria       |
| Diabetes with complic | C10FL11 | Type II diabetes mellitus with persistent proteinuria      |
| Diabetes with complic | C10FM00 | Type 2 diabetes mellitus with persistent microalbuminuria  |
| Diabetes with complic | C10FM11 | Type II diabetes mellitus with persistent microalbuminuria |
| Diabetes with complic | C10FQ00 | Type 2 diabetes mellitus with exudative maculopathy        |
| Diabetes with complic | C10FR00 | Type 2 diabetes mellitus with gastroparesis                |
| Diabetes with complic | Cyu2300 | [X]Unspecified diabetes mellitus with renal complic        |
| Diabetes with complic | F171100 | Autonomic neuropathy due to diabetes                       |
| Diabetes with complic | F345000 | Diabetic mononeuritis multiplex                            |
| Diabetes with complic | F35z000 | Diabetic mononeuritis NOS                                  |
| Diabetes with complic | F372.00 | Polyneuropathy in diabetes                                 |
| Diabetes with complic | F372.11 | Diabetic polyneuropathy                                    |
| Diabetes with complic | F372.12 | Diabetic neuropathy                                        |
| Diabetes with complic | F372000 | Acute painful diabetic neuropathy                          |
| Diabetes with complic | F372100 | Chronic painful diabetic neuropathy                        |
| Diabetes with complic | F372200 | Asymptomatic diabetic neuropathy                           |
| Diabetes with complic | F381300 | Myasthenic synde due to diabetic amyotrophy                |
| Diabetes with complic | F381311 | Diabetic amyotrophy                                        |
| Diabetes with complic | F3y0.00 | Diabetic mononeuropathy                                    |
| Diabetes with complic | F420.00 | Diabetic retinopathy                                       |
| Diabetes with complic | F420000 | Background diabetic retinopathy                            |
| Diabetes with complic | F420100 | Proliferative diabetic retinopathy                         |

|                       |         |                                              |
|-----------------------|---------|----------------------------------------------|
| Diabetes with complic | F420200 | Preproliferative diabetic retinopathy        |
| Diabetes with complic | F420300 | Advanced diabetic maculopathy                |
| Diabetes with complic | F420400 | Diabetic maculopathy                         |
| Diabetes with complic | F420500 | Advanced diabetic retinal dis                |
| Diabetes with complic | F420600 | Non proliferative diabetic retinopathy       |
| Diabetes with complic | F420z00 | Diabetic retinopathy NOS                     |
| Diabetes with complic | F440700 | Diabetic iritis                              |
| Diabetes with complic | F464000 | Diabetic cataract                            |
| Diabetes with complic | G73y000 | Diabetic peripheral angiopathy               |
| Diabetes with complic | K01x100 | Nephrotic synde in diabetes mellitus         |
| Diabetes with complic | K01x111 | Kimmelstiel - Wilson dis                     |
| Diabetes with complic | K08yA00 | Proteinuric diabetic nephropathy             |
| Diabetes with complic | K08yA11 | Clinical diabetic nephropathy                |
| Diabetes with complic | Kyu0300 | [X]Glomerular disorders in diabetes mellitus |
| Diabetes with complic | M037200 | Cellulitis in diabetic foot                  |
| Diabetes with complic | M271000 | Ischaemic ulcer diabetic foot                |
| Diabetes with complic | M271100 | Neuropathic diabetic ulcer - foot            |
| Diabetes with complic | M271200 | Mixed diabetic ulcer - foot                  |
| Diabetes with complic | N030000 | Diabetic cheiroarthropathy                   |
| Diabetes with complic | N030011 | Diabetic cheiroopathy                        |
| Diabetes with complic | N030100 | Diabetic Charcot arthropathy                 |
| Diabetes with complic | R054200 | [D]Gangrene of toe in diabetic               |
| Diabetes with complic | R054300 | [D]Widespread diabetic foot gangrene         |
| hemiplegia/paraplegia | 2833    | O/E - hemiplegia                             |
| hemiplegia/paraplegia | 2835    | O/E - paraplegia                             |
| hemiplegia/paraplegia | 2836    | O/E - quadriplegia                           |
| hemiplegia/paraplegia | F22..00 | Hemiplegia                                   |
| hemiplegia/paraplegia | F22..11 | Hemiparesis                                  |
| hemiplegia/paraplegia | F220.00 | Flaccid hemiplegia                           |
| hemiplegia/paraplegia | F221.00 | Spastic hemiplegia                           |
| hemiplegia/paraplegia | F221.11 | Spastic foot                                 |
| hemiplegia/paraplegia | F222.00 | Left hemiplegia                              |
| hemiplegia/paraplegia | F222.11 | Left sided weakness                          |
| hemiplegia/paraplegia | F223.00 | Right hemiplegia                             |
| hemiplegia/paraplegia | F223.11 | Right sided weakness                         |
| hemiplegia/paraplegia | F22z.00 | Hemiplegia NOS                               |
| hemiplegia/paraplegia | F230.11 | Paraplegia - congenital                      |
| hemiplegia/paraplegia | F230000 | Congenital paraplegia                        |
| hemiplegia/paraplegia | F231.00 | Congenital hemiplegia                        |
| hemiplegia/paraplegia | F232.00 | Congenital quadriplegia                      |
| hemiplegia/paraplegia | F232.11 | Tetraplegia - congenital                     |
| hemiplegia/paraplegia | F234.00 | Infantile hemiplegia NOS                     |
| hemiplegia/paraplegia | F240.00 | Quadriplegia                                 |
| hemiplegia/paraplegia | F240.11 | Tetraplegia                                  |

|                       |         |                                                          |
|-----------------------|---------|----------------------------------------------------------|
| hemiplegia/paraplegia | F240000 | Flaccid tetraplegia                                      |
| hemiplegia/paraplegia | F240100 | Spastic tetraplegia                                      |
| hemiplegia/paraplegia | F241.00 | Paraplegia                                               |
| hemiplegia/paraplegia | F241000 | Flaccid paraplegia                                       |
| hemiplegia/paraplegia | F241100 | Spastic paraplegia                                       |
| hemiplegia/paraplegia | F2A..00 | Hemiparesis                                              |
| hemiplegia/paraplegia | F2Az.00 | Hemiparesis NOS                                          |
| hemiplegia/paraplegia | F2B0.00 | Spastic quadriplegic cerebral palsy                      |
| hemiplegia/paraplegia | F2B1.00 | Spastic hemiplegic cerebral palsy                        |
| HIV/AIDS              | 43C3.00 | HTLV-3 antibody positive                                 |
| HIV/AIDS              | 43C3.11 | HIV positive                                             |
| HIV/AIDS              | A788.00 | Acquired immune deficiency synde                         |
| HIV/AIDS              | A788.11 | Human immunodeficiency virus infection                   |
| HIV/AIDS              | A788000 | Acute human immunodeficiency virus infection             |
| HIV/AIDS              | A788100 | Asymptomatic human immunodeficiency virus infection      |
| HIV/AIDS              | A788200 | HIV inf with persistent generalised lymphadenopathy      |
| HIV/AIDS              | A788300 | Human immunodeficiency virus with constitutional dis     |
| HIV/AIDS              | A788400 | Human immunodeficiency virus with neurological dis       |
| HIV/AIDS              | A788500 | Human immunodeficiency virus with secondary infection    |
| HIV/AIDS              | A788600 | Human immunodeficiency virus with secondary cancers      |
| HIV/AIDS              | A788U00 | HIV dis result/haematological+immunologic abnorms,NEC    |
| HIV/AIDS              | A788W00 | HIV dis resulting in unspecified malignant neoplasm      |
| HIV/AIDS              | A788X00 | HIV dis resulting/unspcf infectious+parasitic dis        |
| HIV/AIDS              | A788y00 | Human immunodeficient virus with other clinical findings |
| HIV/AIDS              | A788z00 | Acquired human immunodeficiency virus infection synde    |
| HIV/AIDS              | A789.00 | Human immunodef virus resulting in other dis             |
| HIV/AIDS              | A789000 | HIV dis resulting in mycobacterial infection             |
| HIV/AIDS              | A789100 | HIV dis resulting in cytomegaloviral dis                 |
| HIV/AIDS              | A789200 | HIV dis resulting in candidiasis                         |
| HIV/AIDS              | A789300 | HIV dis resulting in Pneumocystis carinii pneumonia      |
| HIV/AIDS              | A789311 | HIV dis resulting in Pneumocystis jirovecii pneumonia    |
| HIV/AIDS              | A789400 | HIV dis resulting in multiple infections                 |
| HIV/AIDS              | A789500 | HIV dis resulting in Kaposi's sarcoma                    |
| HIV/AIDS              | A789511 | HIV dis resulting in Kaposi sarcoma                      |
| HIV/AIDS              | A789600 | HIV dis resulting in Burkitt's lymphoma                  |
| HIV/AIDS              | A789700 | HIV dis resulting oth types of non-Hodgkin's lymphoma    |
| HIV/AIDS              | A789800 | HIV dis resulting in multiple malignant neoplasms        |
| HIV/AIDS              | A789900 | HIV dis resulting in lymphoid interstitial pneumonitis   |
| HIV/AIDS              | A789A00 | HIV dis resulting in wasting synde                       |
| HIV/AIDS              | A789X00 | HIV reslt/oth mal neopl/lymph,h'matopoetc+reltd tissu    |
| HIV/AIDS              | AyuC.00 | [X]Human immunodeficiency virus dis                      |
| HIV/AIDS              | AyuC100 | [X]HIV dis resulting in other viral infections           |
| HIV/AIDS              | AyuC300 | [X]HIV dis resulting in multiple infections              |
| HIV/AIDS              | AyuC400 | [X]HIV dis resulting/other infectious+parasitic diss     |

|                   |         |                                                         |
|-------------------|---------|---------------------------------------------------------|
| HIV/AIDS          | AyuC600 | [X]HIV dis resulting in other non-Hodgkin's lymphoma    |
| HIV/AIDS          | AyuCB00 | [X]HIV result/haematological+immunologic abnorms,NEC    |
| HIV/AIDS          | AyuCC00 | [X]HIV dis resulting in other specified conditions      |
| HIV/AIDS          | AyuCD00 | [X]Unspecified human immunodeficiency virus [HIV] dis   |
| HIV/AIDS          | Eu02400 | [X]Dementia in human immunodef virus [HIV] dis          |
| HIV/AIDS          | L179.00 | HIV dis complicating pregnancy childbirth puerperium    |
| HIV/AIDS          | R109.00 | [D]Laboratory evidence of human immunodeficiency virus  |
| HIV/AIDS          | ZV01A00 | [V]Asympto human immunodeficiency virus infect status   |
| Metastatic cancer | A788600 | Human immunodeficiency virus with secondary cancers     |
| Metastatic cancer | B153.00 | Secondary malignant neoplasm of liver                   |
| Metastatic cancer | B56..00 | Secondary unspecified malignant neoplasm lymph nodes    |
| Metastatic cancer | B56..11 | Lymph node metastases                                   |
| Metastatic cancer | B560.00 | Second unspec malig neop lymph nodes head/face/neck     |
| Metastatic cancer | B560000 | Secondary unspec malig neop of superficial parotid LN   |
| Metastatic cancer | B560100 | Secondary and unspec malignant neoplasm mastoid LN      |
| Metastatic cancer | B560200 | Secondary and unspec malig neop superficial cervical LN |
| Metastatic cancer | B560300 | Secondary and unspec malignant neoplasm occipital LN    |
| Metastatic cancer | B560400 | Secondary and unspec malig neop deep parotid LN         |
| Metastatic cancer | B560500 | Secondary and unspec malig neop submandibular LN        |
| Metastatic cancer | B560600 | Secondary and unspec malig neop of facial lymph nodes   |
| Metastatic cancer | B560700 | Secondary and unspec malig neop submental LN            |
| Metastatic cancer | B560800 | Secondary and unspec malig neop anterior cervical LN    |
| Metastatic cancer | B560900 | Secondary and unspec malig neop deep cervical LN        |
| Metastatic cancer | B560z00 | Secondary unspec malig neop LN head/face/neck NOS       |
| Metastatic cancer | B561.00 | Secondary and unspec malig neop intrathoracic LN        |
| Metastatic cancer | B561000 | Secondary and unspec malig neop internal mammary LN     |
| Metastatic cancer | B561100 | Secondary and unspec malig neop intercostal LN          |
| Metastatic cancer | B561200 | Secondary and unspec malig neop diaphragmatic LN        |
| Metastatic cancer | B561300 | Secondary and unspec malig neop ant mediastinal LN      |
| Metastatic cancer | B561400 | Secondary and unspec malig neop post mediastinal LN     |
| Metastatic cancer | B561500 | Secondary and unspec malig neop paratracheal LN         |
| Metastatic cancer | B561600 | Second unspec malig neop superfic tracheobronchial LN   |
| Metastatic cancer | B561700 | Second unspec malig neop inferior tracheobronchial LN   |
| Metastatic cancer | B561800 | Second unspec malig neop bronchopulmonary LN            |
| Metastatic cancer | B561900 | Secondary and unspec malig neop pulmonary LN            |
| Metastatic cancer | B561z00 | Secondary and unspec malig neop intrathoracic LN NOS    |
| Metastatic cancer | B562.00 | Secondary and unspec malig neop intra-abdominal LN      |
| Metastatic cancer | B562000 | Secondary and unspec malig neop coeliac lymph nodes     |
| Metastatic cancer | B562100 | Secondary unspec malig neop superficial mesenteric LN   |
| Metastatic cancer | B562200 | Secondary and unspec malig neop inferior mesenteric LN  |
| Metastatic cancer | B562300 | Secondary and unspec malig neop common iliac LN         |
| Metastatic cancer | B562400 | Secondary and unspec malig neop external iliac LN       |
| Metastatic cancer | B562z00 | Secondary and unspec malig neop intra-abdominal LN      |
| Metastatic cancer | B563.00 | Secondary unspec malig neop axilla and upper limb LN    |

|                   |         |                                                          |
|-------------------|---------|----------------------------------------------------------|
| Metastatic cancer | B563000 | Secondary and unspec malig neop axillary lymph nodes     |
| Metastatic cancer | B563100 | Secondary and unspec malig neop supratrochlear LN        |
| Metastatic cancer | B563200 | Secondary and unspec malig neop infraclavicular LN       |
| Metastatic cancer | B563300 | Secondary and unspec malig neop pectoral lymph nodes     |
| Metastatic cancer | B563z00 | Second unspec malig neop axilla and upper limb LN NOS    |
| Metastatic cancer | B564.00 | Second unspec malig neop inguinal and lower limb LN      |
| Metastatic cancer | B564000 | Secondary and unspec malig neop superficial inguinal LN  |
| Metastatic cancer | B564100 | Secondary and unspec malig neop deep inguinal LN         |
| Metastatic cancer | B564z00 | Secondary and unspec malig neop of inguinal and leg LN   |
| Metastatic cancer | B565.00 | Secondary and unspec malig neop intrapelvic LN           |
| Metastatic cancer | B565000 | Secondary and unspec malig neop internal iliac LN        |
| Metastatic cancer | B565200 | Secondary and unspec malig neop circumflex iliac LN      |
| Metastatic cancer | B565300 | Secondary and unspec malig neop sacral lymph nodes       |
| Metastatic cancer | B565z00 | Secondary and unspec malig neop intrapelvic LN NOS       |
| Metastatic cancer | B56y.00 | Secondary unspec malig neop lymph nodes multiple sites   |
| Metastatic cancer | B56z.00 | Secondary and unspec malig neop lymph nodes NOS          |
| Metastatic cancer | B57..00 | Secondary malig neop of respiratory and digestive syst   |
| Metastatic cancer | B57..11 | Metastases of respiratory and/or digestive systems       |
| Metastatic cancer | B57..12 | Secondary carcinoma of respiratory and/or digestive syst |
| Metastatic cancer | B570.00 | Secondary malignant neoplasm of lung                     |
| Metastatic cancer | B571.00 | Secondary malignant neoplasm of mediastinum              |
| Metastatic cancer | B572.00 | Secondary malignant neoplasm of pleura                   |
| Metastatic cancer | B573.00 | Secondary malignant neoplasm of other respira organs     |
| Metastatic cancer | B574.00 | Second malignant neoplasm of small intestine duodenum    |
| Metastatic cancer | B574000 | Secondary malignant neoplasm of duodenum                 |
| Metastatic cancer | B574200 | Secondary malignant neoplasm of ileum                    |
| Metastatic cancer | B574z00 | Secondary malig neop of small intestine or duodenum      |
| Metastatic cancer | B575.00 | Secondary malignant neoplasm of large intestine rectum   |
| Metastatic cancer | B575000 | Secondary malignant neoplasm of colon                    |
| Metastatic cancer | B575100 | Secondary malignant neoplasm of rectum                   |
| Metastatic cancer | B575z00 | Secondary malig neop of large intestine or rectum NOS    |
| Metastatic cancer | B576.00 | Secondary malig neop of retroperitoneum peritoneum       |
| Metastatic cancer | B576000 | Secondary malignant neoplasm of retroperitoneum          |
| Metastatic cancer | B576100 | Secondary malignant neoplasm of peritoneum               |
| Metastatic cancer | B576200 | Malignant ascites                                        |
| Metastatic cancer | B576z00 | Secondary malig neop of retroperitoneum or peritoneum    |
| Metastatic cancer | B577.00 | Secondary malignant neoplasm of liver                    |
| Metastatic cancer | B577.11 | Liver metastases                                         |
| Metastatic cancer | B57y.00 | Secondary malignant neoplasm of other digestive organ    |
| Metastatic cancer | B57z.00 | Secondary malig neop of respiratory or digestive system  |
| Metastatic cancer | B58..00 | Secondary malignant neoplasm of other specified sites    |
| Metastatic cancer | B58..11 | Secondary carcinoma of other specified sites             |
| Metastatic cancer | B580.00 | Secondary malignant neoplasm of kidney                   |
| Metastatic cancer | B581.00 | Secondary malignant neoplasm of other urinary organs     |

|                   |         |                                                         |
|-------------------|---------|---------------------------------------------------------|
| Metastatic cancer | B581000 | Secondary malignant neoplasm of ureter                  |
| Metastatic cancer | B581100 | Secondary malignant neoplasm of bladder                 |
| Metastatic cancer | B581200 | Secondary malignant neoplasm of urethra                 |
| Metastatic cancer | B581z00 | Secondary malignant neoplasm of other urinary organ     |
| Metastatic cancer | B582.00 | Secondary malignant neoplasm of skin                    |
| Metastatic cancer | B582000 | Secondary malignant neoplasm of skin of head            |
| Metastatic cancer | B582100 | Secondary malignant neoplasm of skin of face            |
| Metastatic cancer | B582200 | Secondary malignant neoplasm of skin of neck            |
| Metastatic cancer | B582300 | Secondary malignant neoplasm of skin of trunk           |
| Metastatic cancer | B582400 | Secondary malignant neoplasm of skin of shoulder/arm    |
| Metastatic cancer | B582500 | Secondary malignant neoplasm of skin of hip and leg     |
| Metastatic cancer | B582600 | Secondary malignant neoplasm of skin of breast          |
| Metastatic cancer | B582z00 | Secondary malignant neoplasm of skin NOS                |
| Metastatic cancer | B583.00 | Secondary malignant neoplasm of brain and spinal cord   |
| Metastatic cancer | B583000 | Secondary malignant neoplasm of brain                   |
| Metastatic cancer | B583100 | Secondary malignant neoplasm of spinal cord             |
| Metastatic cancer | B583200 | Cerebral metastasis                                     |
| Metastatic cancer | B583z00 | Secondary malignant neoplasm of brain or spinal cord    |
| Metastatic cancer | B584.00 | Secondary malignant neoplasm of other part nervous syst |
| Metastatic cancer | B585.00 | Secondary malignant neoplasm of bone and bone marrow    |
| Metastatic cancer | B585000 | Pathological fracture due to metastatic bone dis        |
| Metastatic cancer | B586.00 | Secondary malignant neoplasm of ovary                   |
| Metastatic cancer | B587.00 | Secondary malignant neoplasm of adrenal gland           |
| Metastatic cancer | B58y.00 | Secondary malignant neoplasm of other specified sites   |
| Metastatic cancer | B58y000 | Secondary malignant neoplasm of breast                  |
| Metastatic cancer | B58y100 | Secondary malignant neoplasm of uterus                  |
| Metastatic cancer | B58y200 | Secondary malignant neoplasm of cervix uteri            |
| Metastatic cancer | B58y211 | Secondary cancer of the cervix                          |
| Metastatic cancer | B58y300 | Secondary malignant neoplasm of vagina                  |
| Metastatic cancer | B58y400 | Secondary malignant neoplasm of vulva                   |
| Metastatic cancer | B58y411 | Secondary cancer of the vulva                           |
| Metastatic cancer | B58y500 | Secondary malignant neoplasm of prostate                |
| Metastatic cancer | B58y600 | Secondary malignant neoplasm of testis                  |
| Metastatic cancer | B58y700 | Secondary malignant neoplasm of penis                   |
| Metastatic cancer | B58y800 | Second malignant neoplasm of epididymis/vas deferens    |
| Metastatic cancer | B58y900 | Secondary malignant neoplasm of tongue                  |
| Metastatic cancer | B58yz00 | Secondary malignant neoplasm of other specified site    |
| Metastatic cancer | B58z.00 | Secondary malignant neoplasm of other specified site    |
| Metastatic cancer | B594.00 | Secondary malignant neoplasm of unknown site            |
| Metastatic cancer | BB03.00 | [M]Neoplasm, metastatic                                 |
| Metastatic cancer | BB03.11 | [M]Secondary neoplasm                                   |
| Metastatic cancer | BB13.00 | [M]Carcinoma, metastatic, NOS                           |
| Metastatic cancer | BB13.11 | [M]Secondary carcinoma                                  |
| Metastatic cancer | ByuC200 | [X]2ndry+unspcf malignant neoplasm LN/multi regions     |

|                   |         |                                                          |
|-------------------|---------|----------------------------------------------------------|
| Metastatic cancer | ByuC300 | [X]Second malignant neopl/oth+unspc respiratory organs   |
| Metastatic cancer | ByuC400 | [X]Second malignant neopl/oth+unspcfd digestive organs   |
| Metastatic cancer | ByuC500 | [X]2ndry malignant neopl/bladder+oth+unsp urina organs   |
| Metastatic cancer | ByuC600 | [X]2ndry malignant neopl/oth+unspec parts/nervous syst   |
| Metastatic cancer | ByuC700 | [X]Secondary malignant neoplasm of other specified sites |
| Mild liver dis    | 9KR..00 | Chronic hepatitis annual review -enhanced services admin |
| Mild liver dis    | A707.00 | Chronic viral hepatitis                                  |
| Mild liver dis    | A707000 | Chronic viral hepatitis B with delta-agent               |
| Mild liver dis    | A707100 | Chronic viral hepatitis B without delta-agent            |
| Mild liver dis    | A707200 | Chronic viral hepatitis C                                |
| Mild liver dis    | A707300 | Chronic viral hepatitis B                                |
| Mild liver dis    | A707X00 | Chronic viral hepatitis, unspecified                     |
| Mild liver dis    | C310200 | Hepatorenal glycogenosis                                 |
| Mild liver dis    | C310400 | Glycogenosis with hepatic cirrhosis                      |
| Mild liver dis    | C350012 | Pigmentary cirrhosis of liver                            |
| Mild liver dis    | C370800 | Cystic fibrosis related cirrhosis                        |
| Mild liver dis    | J61..00 | Cirrhosis and chronic liver dis                          |
| Mild liver dis    | J612.00 | Alcoholic cirrhosis of liver                             |
| Mild liver dis    | J612.11 | Florid cirrhosis                                         |
| Mild liver dis    | J612.12 | Laennec's cirrhosis                                      |
| Mild liver dis    | J614.00 | Chronic hepatitis                                        |
| Mild liver dis    | J614000 | Chronic persistent hepatitis                             |
| Mild liver dis    | J614100 | Chronic active hepatitis                                 |
| Mild liver dis    | J614111 | Autoimmune chronic active hepatitis                      |
| Mild liver dis    | J614200 | Chronic aggressive hepatitis                             |
| Mild liver dis    | J614300 | Recurrent hepatitis                                      |
| Mild liver dis    | J614400 | Chronic lobular hepatitis                                |
| Mild liver dis    | J614y00 | Chronic hepatitis unspecified                            |
| Mild liver dis    | J614z00 | Chronic hepatitis NOS                                    |
| Mild liver dis    | J615.00 | Cirrhosis - non alcoholic                                |
| Mild liver dis    | J615.11 | Portal cirrhosis                                         |
| Mild liver dis    | J615100 | Multilobular portal cirrhosis                            |
| Mild liver dis    | J615300 | Diffuse nodular cirrhosis                                |
| Mild liver dis    | J615400 | Fatty portal cirrhosis                                   |
| Mild liver dis    | J615500 | Hypertrophic portal cirrhosis                            |
| Mild liver dis    | J615600 | Capsular portal cirrhosis                                |
| Mild liver dis    | J615700 | Cardiac portal cirrhosis                                 |
| Mild liver dis    | J615711 | Cong cirrhosis                                           |
| Mild liver dis    | J615800 | Juvenile portal cirrhosis                                |
| Mild liver dis    | J615812 | Indian childhood cirrhosis                               |
| Mild liver dis    | J615C00 | Xanthomatous portal cirrhosis                            |
| Mild liver dis    | J615D00 | Bacterial portal cirrhosis                               |
| Mild liver dis    | J615H00 | Infectious cirrhosis NOS                                 |
| Mild liver dis    | J615y00 | Portal cirrhosis unspecified                             |

|                      |         |                                                         |
|----------------------|---------|---------------------------------------------------------|
| Mild liver dis       | J615z00 | Non-alcoholic cirrhosis NOS                             |
| Mild liver dis       | J615z11 | Macronodular cirrhosis of liver                         |
| Mild liver dis       | J615z12 | Cryptogenic cirrhosis of liver                          |
| Mild liver dis       | J615z13 | Cirrhosis of liver NOS                                  |
| Mild liver dis       | J616.00 | Biliary cirrhosis                                       |
| Mild liver dis       | J616000 | Primary biliary cirrhosis                               |
| Mild liver dis       | J616100 | Secondary biliary cirrhosis                             |
| Mild liver dis       | J616200 | Biliary cirrhosis of children                           |
| Mild liver dis       | J616z00 | Biliary cirrhosis NOS                                   |
| Mild liver dis       | J617000 | Chronic alcoholic hepatitis                             |
| Mild liver dis       | J635300 | Toxic liver dis with chronic persistent hepatitis       |
| Mild liver dis       | J635400 | Toxic liver dis with chronic lobular hepatitis          |
| Mild liver dis       | J635500 | Toxic liver dis with chronic active hepatitis           |
| Mild liver dis       | J635600 | Toxic liver dis with fibrosis and cirrhosis of liver    |
| Mild liver dis       | Jyu7100 | [X]Other and unspecified cirrhosis of liver             |
| Mod/severe liver dis | 7800    | Transplantation of liver                                |
| Mod/severe liver dis | 7800000 | Orthotopic transplantation of liver                     |
| Mod/severe liver dis | 7800100 | Heterotopic transplantation of liver                    |
| Mod/severe liver dis | 7800111 | Auxillary liver transplant                              |
| Mod/severe liver dis | 7800112 | Piggy back liver transplant                             |
| Mod/severe liver dis | 7800200 | Replacement of previous liver transplant                |
| Mod/severe liver dis | 7800400 | Orthotopic transplantation of whole liver               |
| Mod/severe liver dis | 7800500 | Orthotopic transplantation of liver NEC                 |
| Mod/severe liver dis | 7800y00 | Other specified transplantation of liver                |
| Mod/severe liver dis | 7800z00 | Transplantation of liver NOS                            |
| Mod/severe liver dis | G850.00 | Oesophageal varices with bleeding                       |
| Mod/severe liver dis | G851.00 | Oesophageal varices without bleeding                    |
| Mod/severe liver dis | G852.00 | Oesophageal varices in diss EC                          |
| Mod/severe liver dis | G852000 | Oesophageal varices with bleeding in diss EC            |
| Mod/severe liver dis | G852100 | Oesophageal varices without bleeding in diss EC         |
| Mod/severe liver dis | G852200 | Oesophageal varices in cirrhosis of the liver           |
| Mod/severe liver dis | G852300 | Oesophageal varices in alcoholic cirrhosis of the liver |
| Mod/severe liver dis | G852z00 | Oesophageal varices in diss EC NOS                      |
| Mod/severe liver dis | G858.00 | Oesophageal varices NOS                                 |
| Mod/severe liver dis | J622.00 | Hepatic coma                                            |
| Mod/severe liver dis | J622.11 | Encephalopathy - hepatic                                |
| Mod/severe liver dis | J623.00 | Portal hypertension                                     |
| Mod/severe liver dis | J624.00 | Hepatorenal synde                                       |
| Mod/severe liver dis | SP08600 | Liver transplant failure and rejection                  |
| Mod/severe liver dis | ZV42700 | [V]Liver transplanted                                   |
| Mod/Severe Renal dis | 14V2.00 | H/O: renal dialysis                                     |
| Mod/Severe Renal dis | 14V2.11 | H/O: kidney dialysis                                    |
| Mod/Severe Renal dis | 1Z1..00 | Chronic renal impairment                                |
| Mod/Severe Renal dis | 1Z10.00 | Chronic kidney dis stage 1                              |



|                      |         |                                                 |
|----------------------|---------|-------------------------------------------------|
| Mod/Severe Renal dis | 1Z11.00 | Chronic kidney dis stage 2                      |
| Mod/Severe Renal dis | 1Z12.00 | Chronic kidney dis stage 3                      |
| Mod/Severe Renal dis | 1Z13.00 | Chronic kidney dis stage 4                      |
| Mod/Severe Renal dis | 1Z14.00 | Chronic kidney dis stage 5                      |
| Mod/Severe Renal dis | 1Z15.00 | Chronic kidney dis stage 3A                     |
| Mod/Severe Renal dis | 1Z16.00 | Chronic kidney dis stage 3B                     |
| Mod/Severe Renal dis | 1Z17.00 | Chronic kidney dis stage 1 with proteinuria     |
| Mod/Severe Renal dis | 1Z17.11 | CKD stage 1 with proteinuria                    |
| Mod/Severe Renal dis | 1Z18.00 | Chronic kidney dis stage 1 without proteinuria  |
| Mod/Severe Renal dis | 1Z19.00 | Chronic kidney dis stage 2 with proteinuria     |
| Mod/Severe Renal dis | 1Z19.11 | CKD stage 2 with proteinuria                    |
| Mod/Severe Renal dis | 1Z1A.00 | Chronic kidney dis stage 2 without proteinuria  |
| Mod/Severe Renal dis | 1Z1A.11 | CKD stage 2 without proteinuria                 |
| Mod/Severe Renal dis | 1Z1B.00 | Chronic kidney dis stage 3 with proteinuria     |
| Mod/Severe Renal dis | 1Z1B.11 | CKD stage 3 with proteinuria                    |
| Mod/Severe Renal dis | 1Z1C.00 | Chronic kidney dis stage 3 without proteinuria  |
| Mod/Severe Renal dis | 1Z1C.11 | CKD stage 3 without proteinuria                 |
| Mod/Severe Renal dis | 1Z1D.00 | Chronic kidney dis stage 3A with proteinuria    |
| Mod/Severe Renal dis | 1Z1D.11 | CKD stage 3A with proteinuria                   |
| Mod/Severe Renal dis | 1Z1E.00 | Chronic kidney dis stage 3A without proteinuria |
| Mod/Severe Renal dis | 1Z1E.11 | CKD stage 3A without proteinuria                |
| Mod/Severe Renal dis | 1Z1F.00 | Chronic kidney dis stage 3B with proteinuria    |
| Mod/Severe Renal dis | 1Z1F.11 | CKD stage 3B with proteinuria                   |
| Mod/Severe Renal dis | 1Z1G.00 | Chronic kidney dis stage 3B without proteinuria |
| Mod/Severe Renal dis | 1Z1G.11 | CKD stage 3B without proteinuria                |
| Mod/Severe Renal dis | 1Z1H.00 | Chronic kidney dis stage 4 with proteinuria     |
| Mod/Severe Renal dis | 1Z1H.11 | CKD stage 4 with proteinuria                    |
| Mod/Severe Renal dis | 1Z1J.00 | Chronic kidney dis stage 4 without proteinuria  |
| Mod/Severe Renal dis | 1Z1J.11 | CKD stage 4 without proteinuria                 |
| Mod/Severe Renal dis | 1Z1K.00 | Chronic kidney dis stage 5 with proteinuria     |
| Mod/Severe Renal dis | 1Z1K.11 | CKD stage 5 with proteinuria                    |
| Mod/Severe Renal dis | 1Z1L.00 | Chronic kidney dis stage 5 without proteinuria  |
| Mod/Severe Renal dis | 1Z1L.11 | CKD stage 5 without proteinuria                 |
| Mod/Severe Renal dis | 66i.00  | Chronic kidney dis monitoring                   |
| Mod/Severe Renal dis | 7A60600 | Creation of graft fistula for dialysis          |
| Mod/Severe Renal dis | 7A61900 | Ligation of arteriovenous dialysis fistula      |
| Mod/Severe Renal dis | 7A61A00 | Ligation of arteriovenous dialysis graft        |
| Mod/Severe Renal dis | 7B00.00 | Transplantation of kidney                       |
| Mod/Severe Renal dis | 7B00000 | Autotransplant of kidney                        |
| Mod/Severe Renal dis | 7B00100 | Transplantation of kidney from live donor       |
| Mod/Severe Renal dis | 7B00111 | Allotransplantation of kidney from live donor   |
| Mod/Severe Renal dis | 7B00200 | Transplantation of kidney from cadaver          |
| Mod/Severe Renal dis | 7B00211 | Allotransplantation of kidney from cadaver      |
| Mod/Severe Renal dis | 7B00212 | Cadaveric renal transplant                      |

|                      |         |                                                           |
|----------------------|---------|-----------------------------------------------------------|
| Mod/Severe Renal dis | 7B00300 | Allotransplantation of kidney from cadaver, heart-beating |
| Mod/Severe Renal dis | 7B00400 | Allotransplantat kidney from cadaver, heart nonbeating    |
| Mod/Severe Renal dis | 7B00600 | Xenograft renal transplant                                |
| Mod/Severe Renal dis | 7B00y00 | Other specified transplantation of kidney                 |
| Mod/Severe Renal dis | 7B00z00 | Transplantation of kidney NOS                             |
| Mod/Severe Renal dis | 7B01500 | Transplant nephrectomy                                    |
| Mod/Severe Renal dis | 7B01511 | Excision of rejected transplanted kidney                  |
| Mod/Severe Renal dis | 7B0F.00 | Interventions associated with transplantation of kidney   |
| Mod/Severe Renal dis | 7B0F100 | Pre-transplantation of kidney work-up, recipient          |
| Mod/Severe Renal dis | 7B0F200 | Pre-transplantation of kidney work-up, live donor         |
| Mod/Severe Renal dis | 7B0F300 | Post-transplantation of kidney examination, recipient     |
| Mod/Severe Renal dis | 7B0F400 | Post-transplantation of kidney examination, live donor    |
| Mod/Severe Renal dis | 7B0Fy00 | OS interventions associa with transplantation of kidney   |
| Mod/Severe Renal dis | 7B0Fz00 | Interventions associated with transplantation of kidney   |
| Mod/Severe Renal dis | 7L1A.00 | Compensation for renal failure                            |
| Mod/Severe Renal dis | 7L1A.11 | Dialysis for renal failure                                |
| Mod/Severe Renal dis | 7L1A000 | Renal dialysis                                            |
| Mod/Severe Renal dis | 7L1A011 | Thomas intravascular shunt for dialysis                   |
| Mod/Severe Renal dis | 7L1A100 | Peritoneal dialysis                                       |
| Mod/Severe Renal dis | 7L1A200 | Haemodialysis NEC                                         |
| Mod/Severe Renal dis | 7L1A300 | Haemofiltration                                           |
| Mod/Severe Renal dis | 7L1A400 | Automated peritoneal dialysis                             |
| Mod/Severe Renal dis | 7L1A500 | Continuous ambulatory peritoneal dialysis                 |
| Mod/Severe Renal dis | 7L1A600 | Peritoneal dialysis NEC                                   |
| Mod/Severe Renal dis | 7L1Ay00 | Other specified compensation for renal failure            |
| Mod/Severe Renal dis | 7L1Az00 | Compensation for renal failure NOS                        |
| Mod/Severe Renal dis | 7L1B.00 | Placement ambulatory apparatus compensation renal fail    |
| Mod/Severe Renal dis | 7L1B.11 | Placemt ambulatory dialysis apparatus-compens ren fail    |
| Mod/Severe Renal dis | 7L1B000 | Insertion of ambulatory peritoneal dialysis catheter      |
| Mod/Severe Renal dis | 7L1B100 | Removal of ambulatory peritoneal dialysis catheter        |
| Mod/Severe Renal dis | 7L1B200 | Flushing of peritoneal dialysis catheter                  |
| Mod/Severe Renal dis | 7L1By00 | Placemt ambulatory apparatus-compensate renal fail OS     |
| Mod/Severe Renal dis | 7L1C.00 | Placement other apparatus for compensation for renal fail |
| Mod/Severe Renal dis | 7L1C000 | Insertion of temporary peritoneal dialysis catheter       |
| Mod/Severe Renal dis | 7L1Cy00 | Placement other apparatus- compensate for renal fail OS   |
| Mod/Severe Renal dis | 7L1Cz00 | Placement other apparatus- compensate for renal failure   |
| Mod/Severe Renal dis | 9Ot..00 | Chronic kidney dis monitoring administration              |
| Mod/Severe Renal dis | 9Ot0.00 | Chronic kidney dis monitoring first letter                |
| Mod/Severe Renal dis | 9Ot1.00 | Chronic kidney dis monitoring second letter               |
| Mod/Severe Renal dis | 9Ot2.00 | Chronic kidney dis monitoring third letter                |
| Mod/Severe Renal dis | 9Ot3.00 | Chronic kidney dis monitoring verbal invite               |
| Mod/Severe Renal dis | 9Ot4.00 | Chronic kidney dis monitoring telephone invite            |
| Mod/Severe Renal dis | 9Ot5.00 | Predicted stage chronic kidney dis                        |
| Mod/Severe Renal dis | D215000 | Anaemia secondary to chronic renal failure                |

|                      |         |                                                           |
|----------------------|---------|-----------------------------------------------------------|
| Mod/Severe Renal dis | F374A00 | Polyneuropathy in uraemia                                 |
| Mod/Severe Renal dis | G500400 | Acute pericarditis - uraemic                              |
| Mod/Severe Renal dis | G72C.00 | Ruptured aneurysm of dialysis vascular access             |
| Mod/Severe Renal dis | G72D.00 | Aneurysm of dialysis arteriovenous fistula                |
| Mod/Severe Renal dis | G72D100 | Aneurysm of needle site of dialysis arteriovenous fistula |
| Mod/Severe Renal dis | G72D200 | Aneurysm of anastomotic site of dialysis AV fistula       |
| Mod/Severe Renal dis | Gy1..00 | Stenosis of dialysis vascular access                      |
| Mod/Severe Renal dis | Gy10.00 | Stenosis of dialysis arteriovenous graft                  |
| Mod/Severe Renal dis | Gy21.00 | Thrombosis of dialysis arteriovenous fistula              |
| Mod/Severe Renal dis | Gy3..00 | Occlusion of dialysis vascular access                     |
| Mod/Severe Renal dis | Gy30.00 | Occlusion of dialysis arteriovenous graft                 |
| Mod/Severe Renal dis | Gy31.00 | Occlusion of dialysis arteriovenous fistula               |
| Mod/Severe Renal dis | Gy40.00 | Infection of dialysis arteriovenous graft                 |
| Mod/Severe Renal dis | Gy41.00 | Infection of dialysis arteriovenous fistula               |
| Mod/Severe Renal dis | Gy5..00 | Haemorrhage of dialysis vascular access                   |
| Mod/Severe Renal dis | Gy51.00 | Haemorrhage of dialysis arteriovenous fistula             |
| Mod/Severe Renal dis | Gy60.00 | Rupture of dialysis arteriovenous graft                   |
| Mod/Severe Renal dis | K02..00 | Chronic glomerulonephritis                                |
| Mod/Severe Renal dis | K02..11 | Nephritis - chronic                                       |
| Mod/Severe Renal dis | K02..12 | Nephropathy - chronic                                     |
| Mod/Severe Renal dis | K020.00 | Chronic proliferative glomerulonephritis                  |
| Mod/Severe Renal dis | K021.00 | Chronic membranous glomerulonephritis                     |
| Mod/Severe Renal dis | K022.00 | Chronic membranoproliferative glomerulonephritis          |
| Mod/Severe Renal dis | K023.00 | Chronic rapidly progressive glomerulonephritis            |
| Mod/Severe Renal dis | K02y.00 | Other chronic glomerulonephritis                          |
| Mod/Severe Renal dis | K02y000 | Chronic glomerulonephritis + diss EC                      |
| Mod/Severe Renal dis | K02y200 | Chronic focal glomerulonephritis                          |
| Mod/Severe Renal dis | K02y300 | Chronic diffuse glomerulonephritis                        |
| Mod/Severe Renal dis | K02yz00 | Other chronic glomerulonephritis NOS                      |
| Mod/Severe Renal dis | K02z.00 | Chronic glomerulonephritis NOS                            |
| Mod/Severe Renal dis | K05..00 | Chronic renal failure                                     |
| Mod/Severe Renal dis | K05..11 | Chronic uraemia                                           |
| Mod/Severe Renal dis | K05..12 | End stage renal failure                                   |
| Mod/Severe Renal dis | K05..13 | Chronic kidney dis                                        |
| Mod/Severe Renal dis | K050.00 | End stage renal failure                                   |
| Mod/Severe Renal dis | K051.00 | Chronic kidney dis stage 1                                |
| Mod/Severe Renal dis | K052.00 | Chronic kidney dis stage 2                                |
| Mod/Severe Renal dis | K053.00 | Chronic kidney dis stage 3                                |
| Mod/Severe Renal dis | K054.00 | Chronic kidney dis stage 4                                |
| Mod/Severe Renal dis | K055.00 | Chronic kidney dis stage 5                                |
| Mod/Severe Renal dis | K06..00 | Renal failure unspecified                                 |
| Mod/Severe Renal dis | K06..11 | Uraemia NOS                                               |
| Mod/Severe Renal dis | K06..12 | Kidney failure unspecified                                |
| Mod/Severe Renal dis | K060.00 | Renal impairment                                          |

|                      |         |                                                             |
|----------------------|---------|-------------------------------------------------------------|
| Mod/Severe Renal dis | K060.11 | Impaired renal function                                     |
| Mod/Severe Renal dis | K0A3.00 | Chronic nephritic synde                                     |
| Mod/Severe Renal dis | K0A3000 | Chronic nephritic synde, minor glomerular abnormality       |
| Mod/Severe Renal dis | K0A3100 | Chronic nephritic syndrm focal+segmental glomerular les     |
| Mod/Severe Renal dis | K0A3200 | Chron nephritic synd difuse membranous glomerulonephr       |
| Mod/Severe Renal dis | K0A3300 | Chron neph syn difus mesangial prolifrtiv glomerulonephr    |
| Mod/Severe Renal dis | K0A3500 | Chronic neph syn difus mesangiocapillary glomerulonephr     |
| Mod/Severe Renal dis | K0A3600 | Chronic nephritic synde, dense deposit dis                  |
| Mod/Severe Renal dis | K0A3700 | Chronic nephritic syn diffuse crescentic glomerulonephr     |
| Mod/Severe Renal dis | K0B5.00 | Renal tubulo-interstitial disordrs in transplant rejectn    |
| Mod/Severe Renal dis | K0D..00 | End-stage renal dis                                         |
| Mod/Severe Renal dis | K0E..00 | Acute-on-chronic renal failure                              |
| Mod/Severe Renal dis | K105.00 | Chronic infective interstitial nephritis                    |
| Mod/Severe Renal dis | K13C000 | Chronic cyclosporin A nephrotoxicity                        |
| Mod/Severe Renal dis | Kyu1000 | [X]Other chronic tubulo-interstitial nephritis              |
| Mod/Severe Renal dis | Kyu1C00 | [X]Renal tubulo-interstitial disorders/transplant rejection |
| Mod/Severe Renal dis | Kyu2.00 | [X]Renal failure                                            |
| Mod/Severe Renal dis | Kyu2100 | [X]Other chronic renal failure                              |
| Mod/Severe Renal dis | SP01500 | Mechanical complication of dialysis catheter                |
| Mod/Severe Renal dis | SP05613 | [X] Peritoneal dialysis associated peritonitis              |
| Mod/Severe Renal dis | SP06B00 | Continuous ambulatory peritoneal dialysis associat perit    |
| Mod/Severe Renal dis | SP07G00 | Stenosis of arteriovenous dialysis fistula                  |
| Mod/Severe Renal dis | SP08011 | Det.ren.func.after ren.transpl                              |
| Mod/Severe Renal dis | SP08300 | Kidney transplant failure and rejection                     |
| Mod/Severe Renal dis | SP08D00 | Acute-on-chronic rejection of renal transplant              |
| Mod/Severe Renal dis | SP08E00 | Acute rejection of renal transplant - grade I               |
| Mod/Severe Renal dis | SP08F00 | Acute rejection of renal transplant - grade II              |
| Mod/Severe Renal dis | SP08G00 | Acute rejection of renal transplant - grade III             |
| Mod/Severe Renal dis | SP08H00 | Acute rejection of renal transplant                         |
| Mod/Severe Renal dis | SP08J00 | Chronic rejection of renal transplant                       |
| Mod/Severe Renal dis | SP08N00 | Unexplained episode of renal transplant dysfunction         |
| Mod/Severe Renal dis | SP08P00 | Stenosis of vein of transplanted kidney                     |
| Mod/Severe Renal dis | SP08R00 | Renal transplant rejection                                  |
| Mod/Severe Renal dis | SP08T00 | Urological complication of renal transplant                 |
| Mod/Severe Renal dis | SP08V00 | Very mild acute rejection of renal transplant               |
| Mod/Severe Renal dis | SP08V11 | Borderline changes of acute rejection                       |
| Mod/Severe Renal dis | SP08W00 | Vascular complication of renal transplant                   |
| Mod/Severe Renal dis | SP0E.00 | Disorders associated with peritoneal dialysis               |
| Mod/Severe Renal dis | SPOF.00 | Haemodialysis first use synde                               |
| Mod/Severe Renal dis | SPOG.00 | Anaphylactoid reaction due to haemodialysis                 |
| Mod/Severe Renal dis | TA02000 | Accid cut,puncture,perf,h'ge - kidney dialysis              |
| Mod/Severe Renal dis | TA22000 | Failure of sterile precautions during kidney dialysis       |
| Mod/Severe Renal dis | TB00100 | Kidney transplant with complication, without blame          |
| Mod/Severe Renal dis | TB00111 | Renal transplant with complication, without blame           |

|                       |         |                                                              |
|-----------------------|---------|--------------------------------------------------------------|
| Mod/Severe Renal dis  | TB11.00 | Kidney dialysis with complication, without blame             |
| Mod/Severe Renal dis  | TB11.11 | Renal dialysis with complication, without blame              |
| Mod/Severe Renal dis  | ZV42000 | [V]Kidney transplanted                                       |
| Mod/Severe Renal dis  | ZV45100 | [V]Renal dialysis status                                     |
| Mod/Severe Renal dis  | ZV56.00 | [V]Aftercare involving intermittent dialysis                 |
| Mod/Severe Renal dis  | ZV56000 | [V]Aftercare involving extracorporeal dialysis               |
| Mod/Severe Renal dis  | ZV56011 | [V]Aftercare involving renal dialysis NOS                    |
| Mod/Severe Renal dis  | ZV56100 | [V]Preparatory care for dialysis                             |
| Mod/Severe Renal dis  | ZV56y00 | [V]Other specified aftercare involving intermittent dialysis |
| Mod/Severe Renal dis  | ZV56y11 | [V]Aftercare involving peritoneal dialysis                   |
| Mod/Severe Renal dis  | ZV56z00 | [V]Unspecified aftercare involving intermittent dialysis     |
| Myocardial infarction | 14A3.00 | H/O: myocardial infarct <60                                  |
| Myocardial infarction | 14A4.00 | H/O: myocardial infarct >60                                  |
| Myocardial infarction | 14AH.00 | H/O: Myocardial infarction in last year                      |
| Myocardial infarction | 14AT.00 | History of myocardial infarction                             |
| Myocardial infarction | G30..00 | Acute myocardial infarction                                  |
| Myocardial infarction | G30..11 | Attack - heart                                               |
| Myocardial infarction | G30..12 | Coronary thrombosis                                          |
| Myocardial infarction | G30..13 | Cardiac rupture following myocardial infarction (MI)         |
| Myocardial infarction | G30..14 | Heart attack                                                 |
| Myocardial infarction | G30..15 | MI - acute myocardial infarction                             |
| Myocardial infarction | G30..16 | Thrombosis - coronary                                        |
| Myocardial infarction | G30..17 | Silent myocardial infarction                                 |
| Myocardial infarction | G300.00 | Acute anterolateral infarction                               |
| Myocardial infarction | G301.00 | Other specified anterior myocardial infarction               |
| Myocardial infarction | G301000 | Acute anteroapical infarction                                |
| Myocardial infarction | G301100 | Acute anteroseptal infarction                                |
| Myocardial infarction | G301z00 | Anterior myocardial infarction NOS                           |
| Myocardial infarction | G302.00 | Acute inferolateral infarction                               |
| Myocardial infarction | G303.00 | Acute inferoposterior infarction                             |
| Myocardial infarction | G304.00 | Posterior myocardial infarction NOS                          |
| Myocardial infarction | G305.00 | Lateral myocardial infarction NOS                            |
| Myocardial infarction | G306.00 | True posterior myocardial infarction                         |
| Myocardial infarction | G307.00 | Acute subendocardial infarction                              |
| Myocardial infarction | G307000 | Acute non-Q wave infarction                                  |
| Myocardial infarction | G307100 | Acute non-ST segment elevation myocardial infarction         |
| Myocardial infarction | G308.00 | Inferior myocardial infarction NOS                           |
| Myocardial infarction | G309.00 | Acute Q-wave infarct                                         |
| Myocardial infarction | G30B.00 | Acute posterolateral myocardial infarction                   |
| Myocardial infarction | G30X.00 | Acute transmural myocardial infarction of unspecif site      |
| Myocardial infarction | G30X000 | Acute ST segment elevation myocardial infarction             |
| Myocardial infarction | G30y.00 | Other acute myocardial infarction                            |
| Myocardial infarction | G30y000 | Acute atrial infarction                                      |
| Myocardial infarction | G30y100 | Acute papillary muscle infarction                            |

|                       |         |                                                            |
|-----------------------|---------|------------------------------------------------------------|
| Myocardial infarction | G30y200 | Acute septal infarction                                    |
| Myocardial infarction | G30yz00 | Other acute myocardial infarction NOS                      |
| Myocardial infarction | G30z.00 | Acute myocardial infarction NOS                            |
| Myocardial infarction | G310.00 | Postmyocardial infarction synde                            |
| Myocardial infarction | G310.11 | Dressler's synde                                           |
| Myocardial infarction | G31y100 | Microinfarction of heart                                   |
| Myocardial infarction | G32..00 | Old myocardial infarction                                  |
| Myocardial infarction | G32..11 | Healed myocardial infarction                               |
| Myocardial infarction | G32..12 | Personal history of myocardial infarction                  |
| Myocardial infarction | G35..00 | Subsequent myocardial infarction                           |
| Myocardial infarction | G350.00 | Subsequent myocardial infarction of anterior wall          |
| Myocardial infarction | G351.00 | Subsequent myocardial infarction of inferior wall          |
| Myocardial infarction | G353.00 | Subsequent myocardial infarction of other sites            |
| Myocardial infarction | G35X.00 | Subsequent myocardial infarction of unspecified site       |
| Myocardial infarction | G36..00 | Current complication follow acute myocardial infarct       |
| Myocardial infarction | G360.00 | Haemopericard/currt comp folow acut myocard infarct        |
| Myocardial infarction | G361.00 | Atrial septal defect/curr comp folow acut myoc infarct     |
| Myocardial infarction | G362.00 | Ventric septal defect/curr comp fol acut myoc infarctn     |
| Myocardial infarction | G363.00 | Ruptur cardiac wall haemopericard/cur comp fol ac MI       |
| Myocardial infarction | G364.00 | Ruptur chordae tendinae/curr comp fol acute myoc infar     |
| Myocardial infarction | G365.00 | Ruptur papillary muscle/curr comp fol acte myocard infar   |
| Myocardial infarction | G366.00 | Thrbis atrium,auric append&vent/curr comp foll acte MI     |
| Myocardial infarction | G38..00 | Postoperative myocardial infarction                        |
| Myocardial infarction | G380.00 | Postoperative transmural myocard infarction anterior wall  |
| Myocardial infarction | G381.00 | Postoperative transmural myocard infarction inferior wall  |
| Myocardial infarction | G383.00 | Postoperative transmural myocardial infarction unspec si   |
| Myocardial infarction | G384.00 | Postoperative subendocardial myocardial infarction         |
| Myocardial infarction | G38z.00 | Postoperative myocardial infarction, unspecified           |
| Myocardial infarction | G501.00 | Post infarction pericarditis                               |
| Myocardial infarction | Gyu3400 | [X]Acute transmural myocardial infarction of unspecif site |
| Myocardial infarction | Gyu3500 | [X]Subsequent myocardial infarction of other sites         |
| Myocardial infarction | Gyu3600 | [X]Subsequent myocardial infarction of unspecified site    |
| Peptic ulcer dis      | J102.00 | Ulcer of oesophagus                                        |
| Peptic ulcer dis      | J102000 | Peptic ulcer of oesophagus                                 |
| Peptic ulcer dis      | J102100 | Fungal ulcer of oesophagus                                 |
| Peptic ulcer dis      | J102200 | Oesophageal ulcer due to aspirin                           |
| Peptic ulcer dis      | J102300 | Oesophageal ulcer due to chemicals                         |
| Peptic ulcer dis      | J102400 | Oesophageal ulcer due to medicines                         |
| Peptic ulcer dis      | J102500 | Barrett's ulcer of oesophagus                              |
| Peptic ulcer dis      | J102z00 | Ulcer of oesophagus NOS                                    |
| Peptic ulcer dis      | J11..00 | Gastric ulcer - (GU)                                       |
| Peptic ulcer dis      | J11..11 | Prepyloric ulcer                                           |
| Peptic ulcer dis      | J11..12 | Pyloric ulcer                                              |
| Peptic ulcer dis      | J110.00 | Acute gastric ulcer                                        |

|                  |         |                                                           |
|------------------|---------|-----------------------------------------------------------|
| Peptic ulcer dis | J110000 | Acute gastric ulcer without mention of complication       |
| Peptic ulcer dis | J110100 | Acute gastric ulcer with haemorrhage                      |
| Peptic ulcer dis | J110111 | Bleeding acute gastric ulcer                              |
| Peptic ulcer dis | J110200 | Acute gastric ulcer with perforation                      |
| Peptic ulcer dis | J110300 | Acute gastric ulcer with haemorrhage and perforation      |
| Peptic ulcer dis | J110y00 | Acute gastric ulcer unspecified                           |
| Peptic ulcer dis | J110z00 | Acute gastric ulcer NOS                                   |
| Peptic ulcer dis | J111.00 | Chronic gastric ulcer                                     |
| Peptic ulcer dis | J111000 | Chronic gastric ulcer without mention of complication     |
| Peptic ulcer dis | J111100 | Chronic gastric ulcer with haemorrhage                    |
| Peptic ulcer dis | J111111 | Bleeding chronic gastric ulcer                            |
| Peptic ulcer dis | J111200 | Chronic gastric ulcer with perforation                    |
| Peptic ulcer dis | J111211 | Perforated chronic gastric ulcer                          |
| Peptic ulcer dis | J111300 | Chronic gastric ulcer with haemorrhage and perforation    |
| Peptic ulcer dis | J111400 | Chronic gastric ulcer with obstruction                    |
| Peptic ulcer dis | J111y00 | Chronic gastric ulcer unspecified                         |
| Peptic ulcer dis | J111z00 | Chronic gastric ulcer NOS                                 |
| Peptic ulcer dis | J112.00 | Anti-platelet induced gastric ulcer                       |
| Peptic ulcer dis | J112z00 | Anti-platelet induced gastric ulcer NOS                   |
| Peptic ulcer dis | J113.00 | Non steroidal antiinflammatory drug induced gastric ulcer |
| Peptic ulcer dis | J113z00 | Non steroidal antiinflammatory drug induced gastric ulc   |
| Peptic ulcer dis | J11y.00 | Unspecified gastric ulcer                                 |
| Peptic ulcer dis | J11y000 | Unspecified gastric ulcer without mention of complication |
| Peptic ulcer dis | J11y100 | Unspecified gastric ulcer with haemorrhage                |
| Peptic ulcer dis | J11y200 | Unspecified gastric ulcer with perforation                |
| Peptic ulcer dis | J11y400 | Unspecified gastric ulcer with obstruction                |
| Peptic ulcer dis | J11yy00 | Unspec gastric ulcer, haemorrhage and/or perforation      |
| Peptic ulcer dis | J11yz00 | Unspecified gastric ulcer NOS                             |
| Peptic ulcer dis | J11z.00 | Gastric ulcer NOS                                         |
| Peptic ulcer dis | J11z.11 | Gastric erosions                                          |
| Peptic ulcer dis | J11z.12 | Multiple gastric ulcers                                   |
| Peptic ulcer dis | J12..00 | Duodenal ulcer - (DU)                                     |
| Peptic ulcer dis | J120.00 | Acute duodenal ulcer                                      |
| Peptic ulcer dis | J120000 | Acute duodenal ulcer without mention of complication      |
| Peptic ulcer dis | J120100 | Acute duodenal ulcer with haemorrhage                     |
| Peptic ulcer dis | J120200 | Acute duodenal ulcer with perforation                     |
| Peptic ulcer dis | J120300 | Acute duodenal ulcer with haemorrhage and perforation     |
| Peptic ulcer dis | J120400 | Acute duodenal ulcer with obstruction                     |
| Peptic ulcer dis | J120y00 | Acute duodenal ulcer unspecified                          |
| Peptic ulcer dis | J120z00 | Acute duodenal ulcer NOS                                  |
| Peptic ulcer dis | J121.00 | Chronic duodenal ulcer                                    |
| Peptic ulcer dis | J121000 | Chronic duodenal ulcer without mention of complication    |
| Peptic ulcer dis | J121100 | Chronic duodenal ulcer with haemorrhage                   |
| Peptic ulcer dis | J121111 | Bleeding chronic duodenal ulcer                           |

|                  |         |                                                          |
|------------------|---------|----------------------------------------------------------|
| Peptic ulcer dis | J121200 | Chronic duodenal ulcer with perforation                  |
| Peptic ulcer dis | J121211 | Perforated chronic duodenal ulcer                        |
| Peptic ulcer dis | J121300 | Chronic duodenal ulcer with haemorrhage/perforation      |
| Peptic ulcer dis | J121400 | Chronic duodenal ulcer with obstruction                  |
| Peptic ulcer dis | J121y00 | Chronic duodenal ulcer unspecified                       |
| Peptic ulcer dis | J121z00 | Chronic duodenal ulcer NOS                               |
| Peptic ulcer dis | J122.00 | Duodenal ulcer dis                                       |
| Peptic ulcer dis | J123.00 | Duodenal erosion                                         |
| Peptic ulcer dis | J124.00 | Recurrent duodenal ulcer                                 |
| Peptic ulcer dis | J125.00 | Anti-platelet induced duodenal ulcer                     |
| Peptic ulcer dis | J126.00 | Nonsteroidal antiinflammatory drug induced duodl ulcer   |
| Peptic ulcer dis | J12y.00 | Unspecified duodenal ulcer                               |
| Peptic ulcer dis | J12y000 | Unspecified duodenal ulcer without mention of complic    |
| Peptic ulcer dis | J12y100 | Unspecified duodenal ulcer with haemorrhage              |
| Peptic ulcer dis | J12y200 | Unspecified duodenal ulcer with perforation              |
| Peptic ulcer dis | J12y300 | Unspec duodenal ulcer with haemorrhage and perforation   |
| Peptic ulcer dis | J12y400 | Unspecified duodenal ulcer with obstruction              |
| Peptic ulcer dis | J12yy00 | Unspec duodenal ulcer, haemorrhage and/or perforation    |
| Peptic ulcer dis | J12yz00 | Unspecified duodenal ulcer NOS                           |
| Peptic ulcer dis | J12z.00 | Duodenal ulcer NOS                                       |
| Peptic ulcer dis | J13..00 | Peptic ulcer - (PU) site unspecified                     |
| Peptic ulcer dis | J13..11 | Stress ulcer NOS                                         |
| Peptic ulcer dis | J130.00 | Acute peptic ulcer                                       |
| Peptic ulcer dis | J130000 | Acute peptic ulcer without mention of complication       |
| Peptic ulcer dis | J130100 | Acute peptic ulcer with haemorrhage                      |
| Peptic ulcer dis | J130200 | Acute peptic ulcer with perforation                      |
| Peptic ulcer dis | J130300 | Acute peptic ulcer with haemorrhage and perforation      |
| Peptic ulcer dis | J130y00 | Acute peptic ulcer unspecified                           |
| Peptic ulcer dis | J130z00 | Acute peptic ulcer NOS                                   |
| Peptic ulcer dis | J131.00 | Chronic peptic ulcer                                     |
| Peptic ulcer dis | J131000 | Chronic peptic ulcer without mention of complication     |
| Peptic ulcer dis | J131100 | Chronic peptic ulcer with haemorrhage                    |
| Peptic ulcer dis | J131200 | Chronic peptic ulcer with perforation                    |
| Peptic ulcer dis | J131400 | Chronic peptic ulcer with obstruction                    |
| Peptic ulcer dis | J131y00 | Chronic peptic ulcer unspecified                         |
| Peptic ulcer dis | J131z00 | Chronic peptic ulcer NOS                                 |
| Peptic ulcer dis | J13y.00 | Unspecified peptic ulcer                                 |
| Peptic ulcer dis | J13y000 | Unspecified peptic ulcer without mention of complication |
| Peptic ulcer dis | J13y100 | Unspecified peptic ulcer with haemorrhage                |
| Peptic ulcer dis | J13y200 | Unspecified peptic ulcer with perforation                |
| Peptic ulcer dis | J13y300 | Unspecified peptic ulcer with haemorrhage/perforation    |
| Peptic ulcer dis | J13y400 | Unspecified peptic ulcer with obstruction                |
| Peptic ulcer dis | J13yz00 | Unspecified peptic ulcer NOS                             |
| Peptic ulcer dis | J13z.00 | Peptic ulcer NOS                                         |



|                         |         |                                                            |
|-------------------------|---------|------------------------------------------------------------|
| Peripheral vascular dis | 14AE.00 | H/O: aortic aneurysm                                       |
| Peripheral vascular dis | 14NB.00 | H/O: Peripheral vascular dis procedure                     |
| Peripheral vascular dis | 16L.00  | Claudication distance                                      |
| Peripheral vascular dis | 2I16.00 | O/E - gangrene                                             |
| Peripheral vascular dis | 662U.00 | Peripheral vascular dis monitoring                         |
| Peripheral vascular dis | 66f3.00 | Aortic aneurysm monitoring                                 |
| Peripheral vascular dis | 7A11.00 | Replacement of aneurysmal bifurcation of aorta             |
| Peripheral vascular dis | 7A11000 | Emg repl aneurysm bifurc aorta by anast aorta to fem art   |
| Peripheral vascular dis | 7A11100 | Repl aneurysm bifurc aorta by anast aorta to femoral art   |
| Peripheral vascular dis | 7A11200 | Emerg repl aneurysm bifurc aorta by anast aorta to iliac a |
| Peripheral vascular dis | 7A11211 | Y graft of abdominal Aortic aneurysm (emergency)           |
| Peripheral vascular dis | 7A11300 | Repl aneurysm bifurc aorta by anast aorta to iliac artery  |
| Peripheral vascular dis | 7A11311 | Y graft abdominal Aortic aneurysm                          |
| Peripheral vascular dis | 7A11y00 | Replacement of aneurysmal bifurcation of aorta OS          |
| Peripheral vascular dis | 7A11z00 | Replacement of aneurysmal bifurcation of aorta NOS         |
| Peripheral vascular dis | 7A13.00 | Emergency replacement of aneurysmal segment of aorta       |
| Peripheral vascular dis | 7A13.11 | Emergency repair of aortic aneurysm                        |
| Peripheral vascular dis | 7A13000 | Emerg repl aneurysm asc aorta by anastom aorta to aorta    |
| Peripheral vascular dis | 7A13100 | Emg repl aneurysm thor aorta by anastom aorta to aorta     |
| Peripheral vascular dis | 7A13300 | Emg repl aneurysm infrarenal aorta by anast aorta/aorta    |
| Peripheral vascular dis | 7A13400 | Emg repl aneurysm abdom aorta by anast aorta/aortaNEC      |
| Peripheral vascular dis | 7A13411 | Tube graft abdominal Aortic aneurysm (emergency)           |
| Peripheral vascular dis | 7A13y00 | Emergency replacement of aneurysmal segment of aorta       |
| Peripheral vascular dis | 7A13z00 | Emergency replacement of aneurysmal segment of aorta       |
| Peripheral vascular dis | 7A14.00 | Other replacement of aneurysmal segment of aorta           |
| Peripheral vascular dis | 7A14.11 | Aortic aneurysm repair                                     |
| Peripheral vascular dis | 7A14000 | Repl aneurysm ascend aorta by anast of aorta/aorta NEC     |
| Peripheral vascular dis | 7A14100 | Repl aneurysm thoracic aorta by anast of aorta/aorta NEC   |
| Peripheral vascular dis | 7A14200 | Repl aneurys suprarenal aorta by anast aorta to aorta NEC  |
| Peripheral vascular dis | 7A14300 | Repl aneurys infrarenal aorta by anast aorta to aorta NEC  |
| Peripheral vascular dis | 7A14400 | Repl aneurysm abdo aorta by anast aorta to aortaNEC        |
| Peripheral vascular dis | 7A14411 | Tube graft of Abdominal aortic aneurysm                    |
| Peripheral vascular dis | 7A14y00 | Other replacement of aneurysmal segment of aorta OS        |
| Peripheral vascular dis | 7A14z00 | Other replacement of aneurysmal segment of aorta NOS       |
| Peripheral vascular dis | 7A19400 | Operation on aneurysm of aorta NEC                         |
| Peripheral vascular dis | 7A1B.00 | Transluminal operations on aneurysmal segment of aorta     |
| Peripheral vascular dis | 7A1B000 | Endovasstenting infrarenal abdominal aortic aneurysm       |
| Peripheral vascular dis | 7A1B100 | Endovasstenting of suprarenal aortic aneurysm              |
| Peripheral vascular dis | 7A1B200 | Endovasstenting of thoracic aortic aneurysm                |
| Peripheral vascular dis | 7A1B500 | Endovasstenting of aorto-uniliac aneurysm                  |
| Peripheral vascular dis | 7A1B600 | Endovasc stenting for aortic aneurysm of bifurcationNEC    |
| Peripheral vascular dis | 7A1B700 | Endovasstenting for aorto-uniliac aneurysm                 |
| Peripheral vascular dis | 7A1B800 | Endovasc insert stent infrarenal abdo aortic aneurysm      |
| Peripheral vascular dis | 7A1B900 | Endovasc insertion stent for suprarenal aortic aneurysm    |

|                         |         |                                                             |
|-------------------------|---------|-------------------------------------------------------------|
| Peripheral vascular dis | 7A1BA00 | Endovasinertion of stent for thoracic aortic aneurysm       |
| Peripheral vascular dis | 7A1BC00 | Endovas insert stent for aortic aneurysm of bifurcatio NEC  |
| Peripheral vascular dis | 7A1BD00 | Endovasinertion of stent for aorto-uniiilic aneurysm        |
| Peripheral vascular dis | 7A1Bz00 | Transluminal operations on aneurysmal segment of aorta      |
| Peripheral vascular dis | 7A1C.00 | Translum insert stent graft for aneurysmal segmt of aort    |
| Peripheral vascular dis | 7A1C000 | Endovas ins stent graft for infrarenal abdom aortic aneurys |
| Peripheral vascular dis | 7A1C100 | Endovas inse of stent graft for suprarenal aortic aneurysm  |
| Peripheral vascular dis | 7A1C200 | Endov insertion of stent graft for thoracic aortic aneurysm |
| Peripheral vascular dis | 7A1C500 | Endovas insert of stent graft for aorto-uniiilic aneurysm   |
| Peripheral vascular dis | 7A1Cy00 | OS translum ins stent graft for aneurysm segment of aorta   |
| Peripheral vascular dis | 7A1Cz00 | Translum ins stent graft for aneurysmal segment of aorta    |
| Peripheral vascular dis | 7A41.00 | Other bypass of iliac artery                                |
| Peripheral vascular dis | 7A41.11 | Other bypass of iliac artery by anastomosis                 |
| Peripheral vascular dis | 7A41000 | Emerg bypass iliac art by iliac/femoral art anastomosisNE   |
| Peripheral vascular dis | 7A41100 | Bypass iliac artery by iliac/femoral artery anastomosis NE  |
| Peripheral vascular dis | 7A41200 | Emerg bypass iliac artery by femoral/femoral art anast NE   |
| Peripheral vascular dis | 7A41211 | Emergency femoro-femoral prosthetic cross over graft        |
| Peripheral vascular dis | 7A41300 | Bypass iliac artery by femoral/femoral art anastomosis NE   |
| Peripheral vascular dis | 7A41311 | Femoro-femoral prosthetic cross over graft                  |
| Peripheral vascular dis | 7A41400 | Emerg bypass comm iliac art by aorta/com iliac art anast    |
| Peripheral vascular dis | 7A41600 | Emerg bypass leg artery by aorta/com fem art anastom        |
| Peripheral vascular dis | 7A41900 | Bypass common iliac artery by aorta/com iliac art anast     |
| Peripheral vascular dis | 7A41B00 | Bypass leg artery by aorta/com femoral art anastomosis      |
| Peripheral vascular dis | 7A41C00 | Bypass leg artery by aorta/deep femoral art anastomosis     |
| Peripheral vascular dis | 7A41D00 | Bypass iliac artery by iliac/ilic artery anastomosis NEC    |
| Peripheral vascular dis | 7A41F00 | Ilio-femoral prosthetic cross over graft                    |
| Peripheral vascular dis | 7A41y00 | Other specified other bypass of iliac artery                |
| Peripheral vascular dis | 7A41z00 | Other bypass of iliac artery NOS                            |
| Peripheral vascular dis | 7A47.00 | Other emergenc bypass of femoral artery/popliteal artery    |
| Peripheral vascular dis | 7A47.11 | Other emerg bypass femoral or popliteal art by anastom      |
| Peripheral vascular dis | 7A47.12 | Other emergency bypass of common femoral artery             |
| Peripheral vascular dis | 7A47.13 | Other emergency bypass of deep femoral artery               |
| Peripheral vascular dis | 7A47.14 | Other emergency bypass of popliteal artery                  |
| Peripheral vascular dis | 7A47.15 | Other emergency bypass of superficial femoral artery        |
| Peripheral vascular dis | 7A47.16 | Other emergency bypass of femoral artery                    |
| Peripheral vascular dis | 7A47000 | Emerg bypass femoral art by fem/pop art anast c prosth      |
| Peripheral vascular dis | 7A47100 | Emerg bypass popliteal art by pop/pop art anast c prosth    |
| Peripheral vascular dis | 7A47200 | Emerg bypass femoral art by fem/pop a anast c vein graft    |
| Peripheral vascular dis | 7A47300 | Emerg bypass pop art by pop/pop art anast c vein graft      |
| Peripheral vascular dis | 7A47400 | Emerg bypass femoral art by fem/tib art anast c prosth N    |
| Peripheral vascular dis | 7A47600 | Emerg bypass femoral art by fem/tib a anast c vein graft N  |
| Peripheral vascular dis | 7A47700 | Emerg bypass pop art by pop/tib art anast c vein graft N    |
| Peripheral vascular dis | 7A47800 | Emerg bypass femoral art by fem/peron art anast c prosth    |
| Peripheral vascular dis | 7A47B00 | Emerg bypass pop art by pop/peron art anast c vein graft    |

|                         |         |                                                             |
|-------------------------|---------|-------------------------------------------------------------|
| Peripheral vascular dis | 7A47C00 | Emerg bypass femoral artery by fem/fem art anastomosis      |
| Peripheral vascular dis | 7A47D00 | Emerg bypass popliteal artery by pop/fem art anastomos      |
| Peripheral vascular dis | 7A47y00 | Other emergency bypass of femoral or popliteal artery OS    |
| Peripheral vascular dis | 7A47z00 | Other emergency bypass of femoral or popliteal artery       |
| Peripheral vascular dis | 7A48.00 | Other bypass of femoral artery or popliteal artery          |
| Peripheral vascular dis | 7A48.11 | Other bypass of femoral or popliteal artery by anastomos    |
| Peripheral vascular dis | 7A48.12 | Other bypass of common femoral artery                       |
| Peripheral vascular dis | 7A48.14 | Other bypass of femoral artery                              |
| Peripheral vascular dis | 7A48.15 | Other bypass of popliteal artery                            |
| Peripheral vascular dis | 7A48.16 | Other bypass of superficial femoral artery                  |
| Peripheral vascular dis | 7A48000 | Bypass femoral artery by fem/pop art anast c prosthesis     |
| Peripheral vascular dis | 7A48100 | Bypass popliteal artery by pop/pop a anast c prosthesis N   |
| Peripheral vascular dis | 7A48200 | Bypass femoral artery by fem/pop art anast c vein graft N   |
| Peripheral vascular dis | 7A48300 | Bypass popliteal artery by pop/pop a anast c vein graft N   |
| Peripheral vascular dis | 7A48400 | Bypass femoral artery by fem/tib art anast c prosthesis N   |
| Peripheral vascular dis | 7A48500 | Bypass popliteal artery by pop/tib a anast c prosthesis N   |
| Peripheral vascular dis | 7A48600 | Bypass femoral artery by fem/tib art anast c vein graft NE  |
| Peripheral vascular dis | 7A48700 | Bypass popliteal artery by pop/tib a anast c vein graft NEC |
| Peripheral vascular dis | 7A48800 | Bypass femoral artery by fem/peron a anast c prosthesis     |
| Peripheral vascular dis | 7A48900 | Bypass popliteal artery by pop/peron art anast c prosth N   |
| Peripheral vascular dis | 7A48A00 | Bypass femoral artery by fem/peron a anast c vein graft N   |
| Peripheral vascular dis | 7A48B00 | Bypass popliteal art by pop/peron art anast c vein graft N  |
| Peripheral vascular dis | 7A48C00 | Bypass femoral artery by femoral/femoral art anastomos      |
| Peripheral vascular dis | 7A48D00 | Bypass popliteal artery by pop/fem artery anastomosis N     |
| Peripheral vascular dis | 7A48E00 | Femoro-femoral prosthetic cross over graft                  |
| Peripheral vascular dis | 7A48y00 | Other bypass of femoral artery or popliteal artery OS       |
| Peripheral vascular dis | 7A48z00 | Other bypass of femoral artery or popliteal artery NOS      |
| Peripheral vascular dis | 9m1..00 | Peripheral vascular dis monitoring invitation               |
| Peripheral vascular dis | 9m10.00 | Peripheral vascular dis monitoring first letter             |
| Peripheral vascular dis | 9m11.00 | Peripheral vascular dis monitoring second letter            |
| Peripheral vascular dis | 9m12.00 | Peripheral vascular dis monitoring third letter             |
| Peripheral vascular dis | A3A0.00 | Gas gangrene                                                |
| Peripheral vascular dis | A3A0000 | Gas gangrene caused by clostridium histolyticum             |
| Peripheral vascular dis | A3A0100 | Gas gangrene caused by clostridium oedematiens              |
| Peripheral vascular dis | A3A0200 | Gas gangrene caused by clostridium perfringens              |
| Peripheral vascular dis | A3A0500 | Gas gangrene                                                |
| Peripheral vascular dis | A3A0B00 | Gas gangrene-hand                                           |
| Peripheral vascular dis | A3A0E00 | Gas gangrene-leg                                            |
| Peripheral vascular dis | A3A0F00 | Gas gangrene-foot                                           |
| Peripheral vascular dis | G71..00 | Aortic aneurysm                                             |
| Peripheral vascular dis | G710.00 | Dissecting aortic aneurysm                                  |
| Peripheral vascular dis | G711.00 | Thoracic aortic aneurysm which has ruptured                 |
| Peripheral vascular dis | G711.11 | Ruptured thoracic aortic aneurysm                           |
| Peripheral vascular dis | G712.00 | Thoracic aortic aneurysm without mention of rupture         |

|                         |         |                                                      |
|-------------------------|---------|------------------------------------------------------|
| Peripheral vascular dis | G713.00 | Abdominal aortic aneurysm which has ruptured         |
| Peripheral vascular dis | G713.11 | Ruptured abdominal aortic aneurysm                   |
| Peripheral vascular dis | G713000 | Ruptured suprarenal aortic aneurysm                  |
| Peripheral vascular dis | G714.00 | Abdominal aortic aneurysm without mention of rupture |
| Peripheral vascular dis | G714.11 | AAA - Abdominal aortic aneurysm without rupture      |
| Peripheral vascular dis | G714000 | Juxtarenal aortic aneurysm                           |
| Peripheral vascular dis | G714100 | Inflammatory abdominal aortic aneurysm               |
| Peripheral vascular dis | G714200 | Infrarenal abdominal aortic aneurysm                 |
| Peripheral vascular dis | G714300 | Aneurysm of suprarenal aorta                         |
| Peripheral vascular dis | G715.00 | Ruptured aortic aneurysm NOS                         |
| Peripheral vascular dis | G715000 | Thoracoabdominal aortic aneurysm, ruptured           |
| Peripheral vascular dis | G716.00 | Aortic aneurysm without mention of rupture NOS       |
| Peripheral vascular dis | G716000 | Thoracoabdominal aortic aneurysm, without rupture    |
| Peripheral vascular dis | G717.00 | Aortic aneurysm - syphilitic                         |
| Peripheral vascular dis | G718.00 | Leaking abdominal aortic aneurysm                    |
| Peripheral vascular dis | G71z.00 | Aortic aneurysm NOS                                  |
| Peripheral vascular dis | G73..00 | Other peripheral vascular dis                        |
| Peripheral vascular dis | G73..11 | Peripheral ischaemic vascular dis                    |
| Peripheral vascular dis | G73..12 | Ischaemia of legs                                    |
| Peripheral vascular dis | G73..13 | Peripheral ischaemia                                 |
| Peripheral vascular dis | G732.00 | Peripheral gangrene                                  |
| Peripheral vascular dis | G732000 | Gangrene of toe                                      |
| Peripheral vascular dis | G732100 | Gangrene of foot                                     |
| Peripheral vascular dis | G732200 | Gangrene of finger                                   |
| Peripheral vascular dis | G732300 | Gangrene of thumb                                    |
| Peripheral vascular dis | G732400 | Gangrene of hand                                     |
| Peripheral vascular dis | G733.00 | Ischaemic foot                                       |
| Peripheral vascular dis | G734.00 | Peripheral arterial dis                              |
| Peripheral vascular dis | G73y.00 | Other specified peripheral vascular dis              |
| Peripheral vascular dis | G73y100 | Peripheral angiopathic dis EC NOS                    |
| Peripheral vascular dis | G73yz00 | Other specified peripheral vascular dis NOS          |
| Peripheral vascular dis | G73z.00 | Peripheral vascular dis NOS                          |
| Peripheral vascular dis | G73z000 | Intermittent claudication                            |
| Peripheral vascular dis | G73z011 | Claudication                                         |
| Peripheral vascular dis | G73z012 | Vascular claudication                                |
| Peripheral vascular dis | G73zz00 | Peripheral vascular dis NOS                          |
| Peripheral vascular dis | G76A.00 | Arterial insufficiency                               |
| Peripheral vascular dis | Gyu7100 | [X]Aortic aneurysm of unspecified site, ruptured     |
| Peripheral vascular dis | Gyu7200 | [X]Aortic aneurysm of unspecified site, nonruptured  |
| Peripheral vascular dis | Gyu7400 | [X]Other specified peripheral vascular dis           |
| Peripheral vascular dis | Gyu7800 | [X]Aneurysm of aorta in dis classified elsewhere     |
| Peripheral vascular dis | R054.00 | [D]Gangrene                                          |
| Peripheral vascular dis | R054000 | [D]Gangrene, spreading cutaneous                     |
| Peripheral vascular dis | R054200 | [D]Gangrene of toe in diabetic                       |

|                         |         |                                      |
|-------------------------|---------|--------------------------------------|
| Peripheral vascular dis | R054300 | [D]Widespread diabetic foot gangrene |
| Peripheral vascular dis | R054z00 | [D]Gangrene NOS                      |
